# Supplementary material for: Catalyst-free dehydrocoupling of amines, alcohols, and thiols with pinacol borane and 9-borabicyclononane (9-BBN)
Source: Royal Society of Chemistry journal article supplement (doi:10.1039/c6cc06096j), 2016-01-01
Supplement: c6cc06096j1.pdf [file c6cc06096j1.pdf]

# ***Catalyst-Free Dehydrocoupling of Amines, Alcohols, and Thiols with Pinacol Borane and 9- Borabicyclononane (9-BBN)***

Erik A. Romero, Jesse L. Peltier, Rodolphe Jazzar, Guy Bertrand\*

UCSD-CNRS Joint Research Laboratory (UMI 3555), Department of Chemistry and Biochemistry, University of California, San Diego, La Jolla, California 92093-0358, United States

|                                                                           |    |
|---------------------------------------------------------------------------|----|
| A. General Considerations .....                                           | 2  |
| B. Kinetics for Concentration Dependence.....                             | 3  |
| C. Time dependant dehydrocoupling of Allyl Amine and Pinacol borane ..... | 3  |
| D. General Procedures for Formation of Dehydrocoupling Products.....      | 4  |
| E. Compounds 1a-1s.....                                                   | 4  |
| F. Compounds 2a-w .....                                                   | 7  |
| G. Compounds 3a-d.....                                                    | 10 |
| H. Spectra .....                                                          | 11 |
| I. X-ray .....                                                            | 56 |

## A. General Considerations

All reactions were performed under an atmosphere of argon using standard Schlenk or dry box techniques; solvents were dried over Na metal, or CaH<sub>2</sub>. **Reagents of analytical grade were obtained from commercial suppliers and used without drying, degassing, or purification** of any kind. New glassware and new stir bars were used to mitigate trace metal involvement. <sup>1</sup>H, <sup>13</sup>C, <sup>11</sup>B and <sup>19</sup>F NMR spectra were obtained using either a Bruker Avance 300 MHz, a Varian INOVA 500 MHz spectrometer or JOEL 500 MHz. Chemical shifts (δ) are reported in parts per million (ppm) relative to TMS, and were referenced to the residual solvent peak. NMR multiplicities are abbreviated as follows: s = singlet, d = doublet, t = triplet, q = quartet, quin = quintet, sex = sextet, sept = septet, m = multiplet, br = broad signal. NB: We were unable to obtain HRMS data analysis using the facility available at UCSD; Hence all substrates were submitted either low-resolution ESI (Micromass Quattro Ultima Triple Quadrupole MS) or to GCMS analysis (Agilent GCMS: 7820A). Corresponding LRMS are reported as obtained. Regarding the GCMS analysis, please find an example hereafter of a typical GC trace and MS spectra (here **2v**).

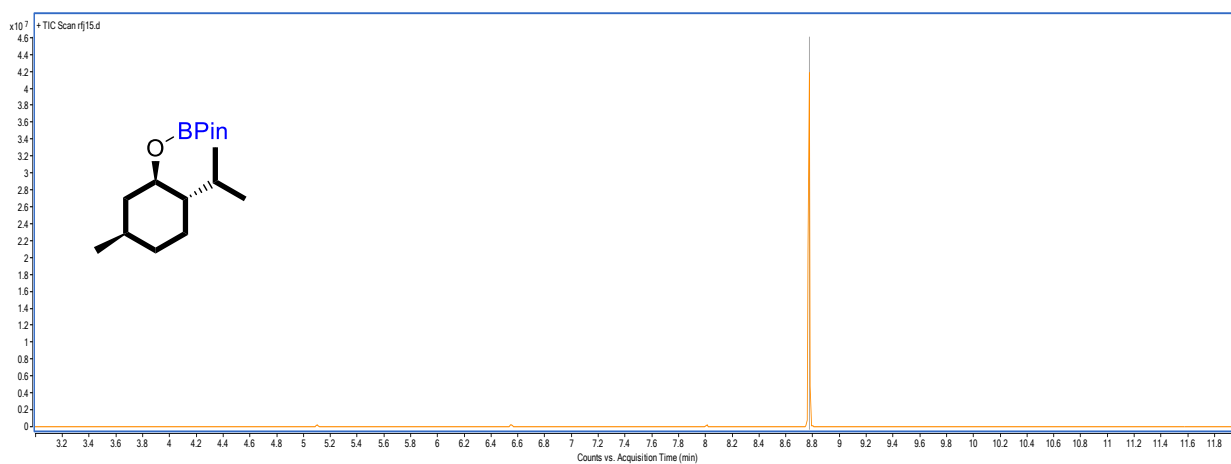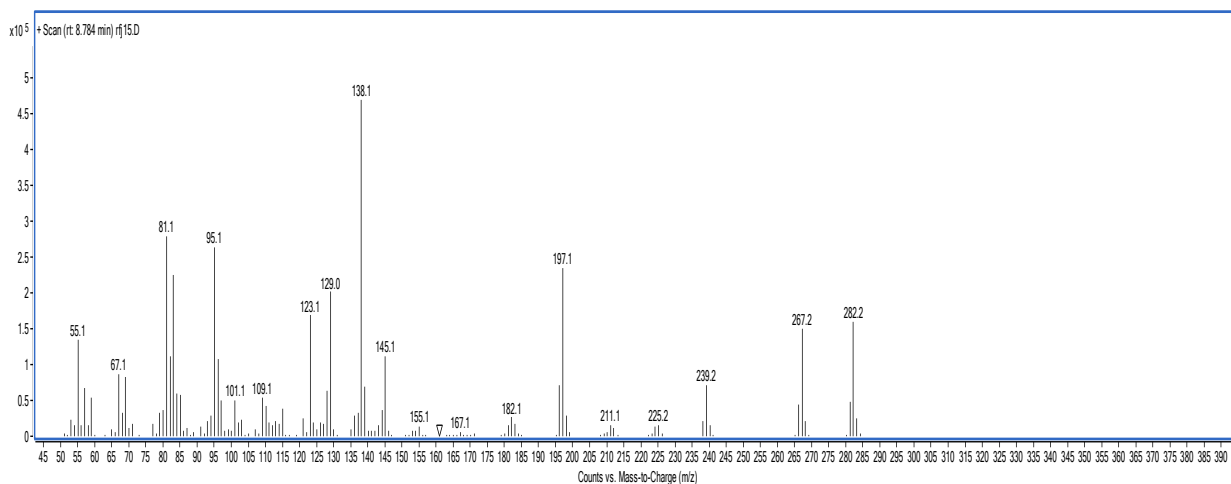

## B. Kinetics for Concentration Dependence

All the kinetic measurements were performed in a J-Young NMR tube at room temperature on a Bruker 300 MHz NMR machine using the multi\_zgvd command. Conversions were measured following the growth of the characteristic signals for **1a** with respect to the depleting signals for the starting aniline. In each kinetic run, 0.4 mmol (0.036 mL) of aniline and 0.4 mmol (0.058 mL) of PinBH were used in combination with CD<sub>3</sub>CN (x mL used to attain concentrations listed below).

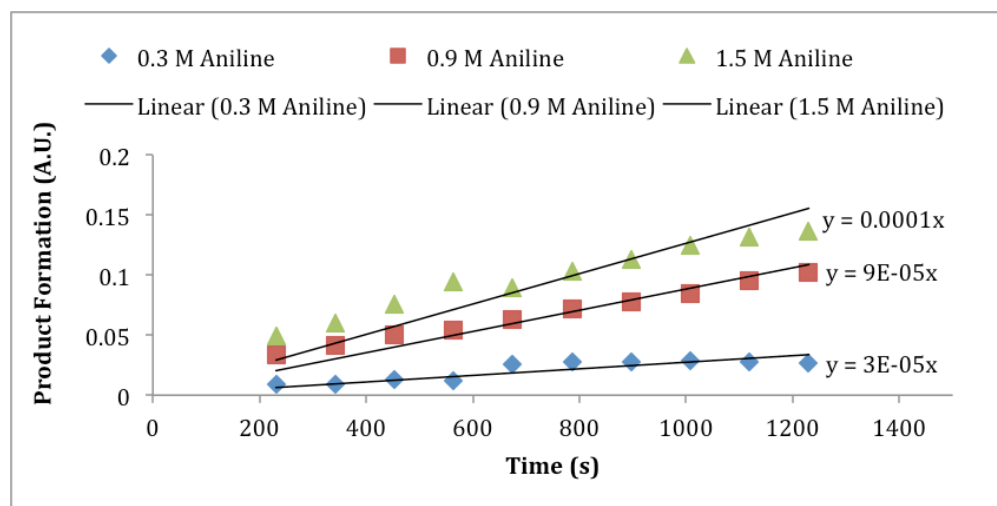

**Fig. S1.** Concentration dependence plot of the aniline dehydrocoupling reaction with pinacol borane in acetonitrile.

## C. Time dependant dehydrocoupling of Allyl Amine and Pinacol borane

This experiment was performed in a J-Young NMR tube at room temperature on a Bruker 300 MHz NMR machine. The growth of the characteristic signals for **1g** were followed with respect to the depleting signals for the starting allyl amine. Typically 0.08 mmol (0.006 mL) of allyl amine and 0.08 mmol (0.012 mL) of PinBH were used in combination with CD<sub>3</sub>CN.

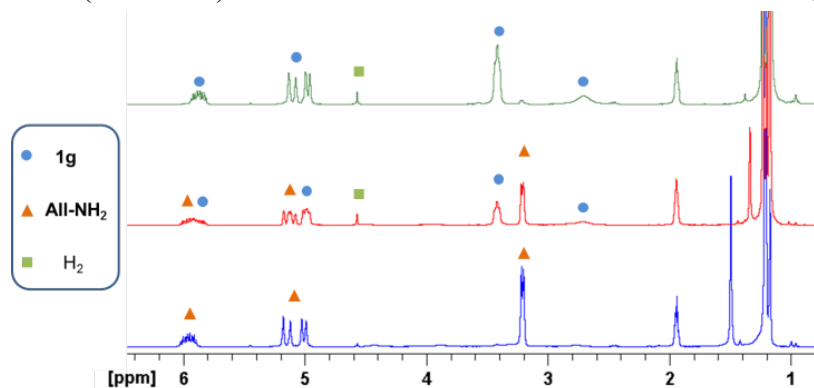

**Fig. S2.** <sup>1</sup>H NMR spectra of allylamine and pinacol borane in acetonitrile at t<sub>0</sub> (bottom), 12 h (middle), and 24 h (top).

## D. General Procedures for Formation of Dehydrocoupling Products

**Protocol 1:** Under an argon atmosphere, CD<sub>3</sub>CN (if amine/alcohol/thiol is solid at RT to achieve 3 M solution), and the amine (0.8 mmol) were added to a 1 dram vial equipped with a magnetic stir bar. Then, pinacol borane (0.116 mL, 0.8 mmol) was added to the reaction mixture and the reaction was left stirring at room temperature until the reaction was complete. Evaporation of the volatiles under vacuum afforded the corresponding product.

**Protocol 2:** Under an argon atmosphere, C<sub>6</sub>D<sub>6</sub> (0.5 mL) and 9-BBN (97.6 mg, 0.4 mmol) were added to a 1 dram vial equipped with a magnetic stir bar. Then, the amine or alcohol (0.8 mmol) was added to the reaction mixture, and the reaction was left stirring at room temperature until the reaction was complete. Evaporation of the volatiles under vacuum afforded the corresponding product.

**Protocol 3:** Under an argon atmosphere, CD<sub>3</sub>CN (to achieve 3 M solution), the aniline or phenol (0.8 mmol), pinacol borane (0.8 mmol), and 1 mol % Et<sub>3</sub>N were added to a J-Young NMR tube. The reaction was sealed and heated to 120°C until the reaction was complete. Evaporation of the volatiles under vacuum afforded the corresponding product.

## E. Compounds 1a-1s

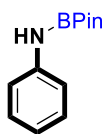

**1a: Protocol 1.** White solid (96% yield). <sup>1</sup>H NMR (CDCl<sub>3</sub>, 300 MHz) δ = 1.34 (s, 12H), 4.67 (s, br, 1H), 6.88 (t, J = 7.2 Hz, 1H), 7.11 (d, J = 7.2 Hz, 2H), 7.22 (d, J = 7.4 Hz, 2H) ppm. <sup>13</sup>C NMR (CDCl<sub>3</sub>, 75 MHz) δ = 24.7, 82.9, 117.7, 120.2, 129.1, 143.4 ppm. <sup>11</sup>B NMR (CDCl<sub>3</sub>, 96 MHz) δ = 23.9 ppm. GCMS (m/z : Calc : 219.1; Exp : 219.2).

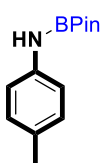

**1b: Protocol 1.** White solid (97% yield). <sup>1</sup>H NMR (CDCl<sub>3</sub>, 300 MHz) δ = 1.36 (s, 12H), 2.34 (s, 3H), 4.67 (s, br, 1H), 7.05 (s, 4H) ppm. <sup>13</sup>C NMR (CDCl<sub>3</sub>, 75 MHz) δ = 20.5, 24.6, 82.7, 117.6, 129.1, 129.5, 140.8 ppm. <sup>11</sup>B NMR (CDCl<sub>3</sub>, 96 MHz) δ = 23.8 ppm. GCMS (m/z : Calc : 233.2; Exp : 233.2).

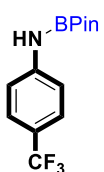

**1c: Protocol 1.** Colorless oil (97% yield). <sup>1</sup>H NMR (CDCl<sub>3</sub>, 300 MHz) δ = 1.32 (s, 12H), 4.85 (s, br, 1H), 7.15 (d, J = 8.8 Hz, 2H), 7.44 (d, J = 8.7 Hz, 2H) ppm. <sup>13</sup>C NMR (CDCl<sub>3</sub>, 75 MHz) δ = 24.7, 83.4, 114.3, 117.4, 122.3, 126.4, 146.8 ppm. <sup>11</sup>B NMR (CDCl<sub>3</sub>, 96 MHz) δ = 24.0 ppm. <sup>19</sup>F NMR (CDCl<sub>3</sub>, 283 MHz) δ = -61.5 ppm. GCMS (m/z : Calc : 287.1; Exp : 287.1).

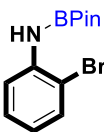

**1d: Protocol 1.** White solid (92% yield). <sup>1</sup>H NMR (CDCl<sub>3</sub>, 500 MHz) δ = 1.37 (s, 12H), 5.37 (s, br, 1H), 6.75 (m, 1H), 7.23 (m, 1H), 7.48 (dt, br, J = 1.4 Hz, 7.9 Hz, 1H), 7.71 (dt, br, J = 1.5 Hz, 8.2 Hz, 1H) ppm. <sup>13</sup>C NMR (CDCl<sub>3</sub>, 125 MHz) δ = 24.8, 83.2, 112.5, 118.7, 121.1, 128.4, 132.3, 141.4 ppm. <sup>11</sup>B NMR (CDCl<sub>3</sub>, 160 MHz) δ = 23.2 ppm. ESI-MS (M+K) (m/z : Calc : 336.0; Exp : 336.2).

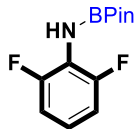

**1e: Protocol 1.** Colorless oil (97% yield).  $^1\text{H}$  NMR ( $\text{CDCl}_3$ , 300 MHz)  $\delta$  = 1.26 (s, 12H), 4.35 (s, 1H), 6.80-6.82 (m, 3H) ppm.  $^{13}\text{C}$  NMR ( $\text{CDCl}_3$ , 75 MHz)  $\delta$  = 24.4, 83.2, 111.3 (m), 120.0 (t,  $J_{\text{C-F}}$  = 15.9 Hz), 121.9 (t,  $J_{\text{C-F}}$  = 9.52 Hz), 156.0 (dd,  $J_{\text{C-F}}$  = 5.6 Hz, 246.4 Hz) ppm.  $^{11}\text{B}$  NMR ( $\text{CDCl}_3$ , 96 MHz)  $\delta$  = 23.9 ppm.  $^{19}\text{F}$  NMR ( $\text{CDCl}_3$ , 283 MHz)  $\delta$  = -122.9 ppm. GCMS (m/z : Calc : 255.1; Exp : 255.2).

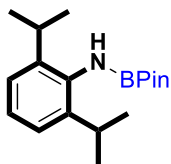

**1f: Protocol 3.** White solid (97% yield).  $^1\text{H}$  NMR ( $\text{CDCl}_3$ , 300 MHz)  $\delta$  = 1.23 (d,  $J$  = 6.8 Hz, 12H), 1.27 (s, 12H), 3.39 (m, 2H), 3.78 (s, br, 1H), 7.14 (m, 3H) ppm.  $^{13}\text{C}$  NMR ( $\text{CDCl}_3$ , 75 MHz)  $\delta$  = 23.7, 24.8, 28.4, 82.7, 123.1, 125.7, 135.5, 145.3 ppm.  $^{11}\text{B}$  NMR ( $\text{CDCl}_3$ , 96 MHz)  $\delta$  = 24.2 ppm. ESI-MS (m/z : Calc : 304.3; Exp : 304.3).

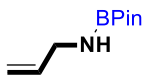

**1g: Protocol 1.** Deliquescent solid (96% yield).  $^1\text{H}$  NMR ( $\text{CD}_3\text{CN}$ , 300 MHz)  $\delta$  = 1.17 (s, 12H), 2.71 (s, br, 1H), 3.42 (m, br, 2H), 4.98 (dd,  $J$  = 1.7 Hz, 10.4 Hz, 1H), 5.10 (dd,  $J$  = 1.9 Hz, 17.2 Hz, 1H), 5.87 (m, 1H) ppm.  $^{13}\text{C}$  NMR ( $\text{CD}_3\text{CN}$ , 75 MHz)  $\delta$  = 24.9, 44.1, 82.7, 113.2, 140.5 ppm.  $^{11}\text{B}$  NMR ( $\text{CD}_3\text{CN}$ , 96 MHz)  $\delta$  = 24.6 ppm. ESI-MS (m/z : Calc : 184.1; Exp : 184.1).

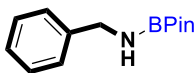

**1h: Protocol 1.** Deliquescent solid (97% yield).  $^1\text{H}$  NMR ( $\text{CDCl}_3$ , 300 MHz)  $\delta$  = 1.22 (s, 12H), 2.52 (s, br, 1H), 4.08 (d,  $J$  = 7.9 Hz, 2H), 7.25 (m, 5H) ppm.  $^{13}\text{C}$  NMR ( $\text{CDCl}_3$ , 75 MHz)  $\delta$  = 24.6, 45.2, 82.2, 116.5, 126.7, 128.3, 142.3 ppm.  $^{11}\text{B}$  NMR ( $\text{CDCl}_3$ , 96 MHz)  $\delta$  = 24.5 ppm. GCMS (m/z : Calc : 233.2; Exp : 233.2).

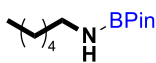

**1i: Protocol 1.** Deliquescent solid (96% yield).  $^1\text{H}$  NMR ( $\text{CDCl}_3$ , 300 MHz)  $\delta$  = 0.85 (t,  $J$  = 7.3 Hz, 3H), 1.19 (s, 12H), 1.22-1.41 (m, 8H), 2.13 (s, br, 1H), 2.84 (q,  $J$  = 6.6 Hz, 2H) ppm.  $^{13}\text{C}$  NMR ( $\text{CDCl}_3$ , 75 MHz)  $\delta$  = 14.1, 22.7, 24.6, 26.3, 31.7, 33.6, 41.1, 81.9 ppm.  $^{11}\text{B}$  NMR ( $\text{CDCl}_3$ , 96 MHz)  $\delta$  = 24.3 ppm. GCMS (m/z : Calc : 227.2; Exp : 227.2).

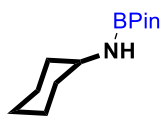

**1j: Protocol 1.** White Solid (96% yield).  $^1\text{H}$  NMR ( $\text{CDCl}_3$ , 300 MHz)  $\delta$  = 0.85-1.05 (m, 4H), 1.12 (s, 12H), 1.30-1.64 (m, 4H), 1.74 (dd (br),  $J$  = 3.0 Hz, 12.6 Hz, 2H), 2.09 (s, br, 1H), 2.81 (m, 1H) ppm.  $^{13}\text{C}$  NMR ( $\text{CDCl}_3$ , 75 MHz)  $\delta$  = 24.6, 25.3, 25.8, 37.2, 49.5, 81.8 ppm.  $^{11}\text{B}$  NMR ( $\text{CDCl}_3$ , 96 MHz)  $\delta$  = 24.6 ppm. GCMS (m/z : Calc : 225.2; Exp : 225.2).

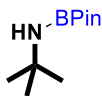

**1k: Protocol 1.** Deliquescent solid (95% yield).  $^1\text{H}$  NMR ( $\text{CDCl}_3$ , 300 MHz)  $\delta$  = 1.15 (s, 9H), 1.17 (s, 12H), 2.37 (s, br, 1H) ppm.  $^{13}\text{C}$  NMR ( $\text{CDCl}_3$ , 75 MHz)  $\delta$  = 24.6, 32.2, 47.8, 81.4 ppm.  $^{11}\text{B}$  NMR ( $\text{CDCl}_3$ , 96 MHz)  $\delta$  = 23.7 ppm. ESI-MS (m/z : Calc : 200.2; Exp : 200.2).

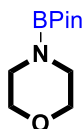

**1l: Protocol 1.** White solid (93% yield).  $^1\text{H}$  NMR ( $\text{CDCl}_3$ , 300 MHz)  $\delta$  = 1.20 (s, 12H), 3.06 (t,  $J$  = 4.3 Hz, 4H), 3.55 (t,  $J$  = 4.6 Hz, 4H) ppm.  $^{13}\text{C}$  NMR ( $\text{CDCl}_3$ , 75 MHz)  $\delta$  = 24.7, 44.6, 68.5, 82.3 ppm.  $^{11}\text{B}$  NMR ( $\text{CDCl}_3$ , 96 MHz)  $\delta$  = 23.4 ppm. GC/ESI-MS could not be obtained.

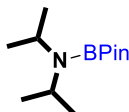

**1m: Protocol 1.** White solid (90% yield).  $^1\text{H}$  NMR ( $\text{CDCl}_3$ , 500 MHz)  $\delta$  = 1.09 (d,  $J$  = x.x Hz, 12H), 1.18 (s, 12H), 3.34 (m, 2H) ppm.  $^{13}\text{C}$  NMR ( $\text{CDCl}_3$ , 125 MHz)  $\delta$  = 23.3, 24.6, 44.6, 81.0 ppm.  $^{11}\text{B}$  NMR ( $\text{CDCl}_3$ , 160 MHz)  $\delta$  = 24.2 ppm. GCMS ( $m/z$  : Calc : 227.2; Exp : 227.1).

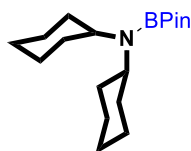

**1n: Protocol 1.** White solid (96% yield).  $^1\text{H}$  NMR ( $\text{CDCl}_3$ , 300 MHz)  $\delta$  = 1.07 (m, 2H), 1.16 (s, 12H), 1.26 (m, 5H), 1.52 (m, 9H), 1.70 (m, 4H), 2.80 (m, 2H) ppm.  $^{13}\text{C}$  NMR ( $\text{CDCl}_3$ , 75 MHz)  $\delta$  = 24.6, 25.9, 26.7, 33.8, 54.1, 80.9 ppm.  $^{11}\text{B}$  NMR ( $\text{CDCl}_3$ , 96 MHz)  $\delta$  = 23.9 ppm. GCMS ( $m/z$  : Calc : 307.3; Exp : 307.4).

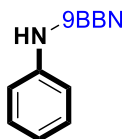

**1o** Error! Bookmark not defined. **Protocol 2.** Deliquescent solid (97% yield).  $^1\text{H}$  MR ( $\text{CDCl}_3$ , 300 MHz)  $\delta$  = 1.07 (s, br, 2H), 1.40 (m, 4H), 1.79 (m, 8H), 6.05 (s, br, 1H), 7.00 (d,  $J$  = 8.1 Hz, 3H), 7.24 (t,  $J$  = 8.1 Hz, 2H) ppm.  $^{13}\text{C}$  NMR ( $\text{CDCl}_3$ , 75 MHz)  $\delta$  = 23.5, 33.0, 33.8, 122.4, 122.9, 129.0, 143.7 ppm.  $^{11}\text{B}$  NMR ( $\text{CDCl}_3$ , 96 MHz)  $\delta$  = 51.2 ppm. GC/ESI-MS could not be obtained.

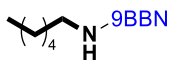

**1p: Protocol 2.** Deliquescent solid (98% yield).  $^1\text{H}$  NMR ( $\text{CDCl}_3$ , 300 MHz)  $\delta$  = 0.91 (s, br, 3H), 1.31 (s, 8H), 1.61-1.90 (m, 14H), 3.03 (q,  $J$  = 6.8 Hz, 2H), 3.92 (s, br, 1H) ppm.  $^{13}\text{C}$  NMR ( $\text{CDCl}_3$ , 75 MHz)  $\delta$  = 14.1, 22.8, 23.8, 26.5, 31.8, 33.1, 33.7, 33.9, 42.6 ppm.  $^{11}\text{B}$  NMR ( $\text{CDCl}_3$ , 96 MHz)  $\delta$  = 48.5 ppm. GC/ESI-MS could not be obtained.

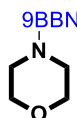

**1q: Protocol 2.** White solid (97% yield).  $^1\text{H}$  NMR ( $\text{CDCl}_3$ , 300 MHz)  $\delta$  = 1.20-1.99 (m, br, 14H), 3.32 (t,  $J$  = 4.4 Hz, 2H), 3.60 (t,  $J$  = 4.4 Hz, 2H) ppm.  $^{13}\text{C}$  NMR ( $\text{CDCl}_3$ , 75 MHz)  $\delta$  = 23.5, 33.4, 47.6, 69.5 ppm, C[B] could not be detected.  $^{11}\text{B}$  NMR ( $\text{CDCl}_3$ , 96 MHz)  $\delta$  = 47.3 ppm. GC/ESI-MS ( $m/z$  : Calc : 208.2; Exp : 208.1).

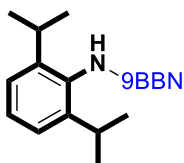

**1r: Protocol 2.** Deliquescent solid (97% yield).  $^1\text{H}$  NMR ( $\text{CDCl}_3$ , 300 MHz)  $\delta$  = 1.29 (d,  $J$  = 6.6 Hz, 12H), 1.50 (m, br, 2H), 1.74 (m, 4H) 1.97 (m, br, 8H), 3.50 (m, 2H), 5.31 (s, br, 1H), 7.24 (m, 3H) ppm.  $^{13}\text{C}$  NMR ( $\text{CDCl}_3$ , 75 MHz)  $\delta$  = 22.6, 23.5, 28.0, 33.0, 33.8, 123.0, 125.9, 137.2, 145.2 ppm.  $^{11}\text{B}$  NMR ( $\text{CDCl}_3$ , 96 MHz)  $\delta$  = 50.5 ppm. GC/ESI-MS could not be obtained.

## F. Compounds 2a-w

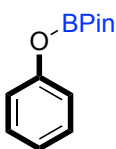

**2a: Protocol 1.** White solid 0.169 g (98% yield).  $^1\text{H}$  NMR ( $\text{CDCl}_3$ , 300 MHz)  $\delta$  = 1.35 (s, 12H), 7.05-7.13 (m, 3H), 7.28-7.33 (m, 2H) ppm.  $^{13}\text{C}$  NMR ( $\text{CDCl}_3$ , 75 MHz)  $\delta$  = 25.3, 84.5, 116.4, 122.1, 133.0, 153.3 ppm.  $^{11}\text{B}$  NMR ( $\text{CDCl}_3$ , 96 MHz)  $\delta$  = 21.8 ppm. GCMS (m/z : Calc : 220.13 ; Exp : 220.1).

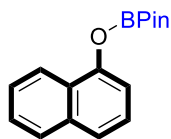

**2b: Protocol 1.** White solid 0.211 g (96% yield).  $^1\text{H}$  NMR ( $\text{CDCl}_3$ , 300 MHz)  $\delta$  = 1.38 (s, 12 H), 7.31 (d,  $J$  = 9 Hz, 1H), 7.40-7.42 (m, 1H), 7.45-7.52 (m, 2H), 7.61 (d,  $J$  = 9 Hz, 1H), 7.85 (m, 1H), 8.22-8.23 (m, 1H) ppm.  $^{13}\text{C}$  NMR ( $\text{CDCl}_3$ , 75 MHz)  $\delta$  = 24.8, 83.8, 114.1, 122.2, 123.2, 125.7, 125.9, 126.4, 126.9, 127.8, 134.8, 149.4 ppm.  $^{11}\text{B}$  NMR ( $\text{CDCl}_3$ , 96 MHz)  $\delta$  = 22.2 ppm. GCMS (m/z : Calc : 270.14 ; Exp : 270.2).

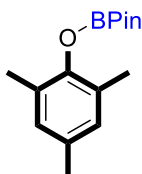

**2c: Protocol 1.** Colorless oil 0.203 g (97% yield).  $^1\text{H}$  NMR ( $\text{CDCl}_3$ , 300 MHz)  $\delta$  = 1.40 (s, 12H), 2.31 (s, 6H), 2.34 (s, 3H), 6.92 (s, 2H) ppm.  $^{13}\text{C}$  NMR ( $\text{CDCl}_3$ , 75 MHz)  $\delta$  = 16.4, 20.7, 24.5, 83.4, 127.9, 129.0, 132.4, 148.4 ppm.  $^{11}\text{B}$  NMR ( $\text{CDCl}_3$ , 96 MHz)  $\delta$  = 21.6 ppm. GCMS (m/z : Calc : 262.2 ; Exp : 262.2).

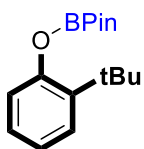

**2d: Protocol 1.** Colorless oil 0.214 g (97% yield).  $^1\text{H}$  NMR ( $\text{CDCl}_3$ , 300 MHz)  $\delta$  = 1.39 (s, 12H), 1.48 (s, 9H), 7.08-7.11 (m, 2H), 7.19-7.22 (m, 1H), 7.38 (d,  $J$  = 9 Hz, 1H) ppm.  $^{13}\text{C}$  NMR ( $\text{CDCl}_3$ , 75 MHz)  $\delta$  = 24.7, 29.7, 30.1, 34.7, 83.6, 121.5, 123.3, 126.8, 127.0, 139.8, 152.2 ppm.  $^{11}\text{B}$  NMR ( $\text{CDCl}_3$ , 96 MHz)  $\delta$  = 21.9 ppm. GCMS (m/z : Calc : 276.2 ; Exp : 276.2).

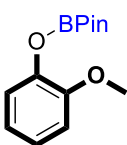

**2e: Protocol 1.** Colorless oil 10.98 g (99% yield).  $^1\text{H}$  NMR ( $\text{CDCl}_3$ , 300 MHz)  $\delta$  = 1.34 (s, 12H), 3.85 (s, 3H), 6.87-6.94 (m, 2H), 7.03-7.11 (m, 2H) ppm.  $^{13}\text{C}$  NMR ( $\text{CDCl}_3$ , 75 MHz)  $\delta$  = 24.5, 55.5, 83.4, 112.1, 120.4, 120.8, 123.8, 143.0, 150.1 ppm.  $^{11}\text{B}$  NMR ( $\text{CDCl}_3$ , 96 MHz)  $\delta$  = 22.0 ppm. GCMS (m/z : Calc : 250.1 ; Exp : 250.1).

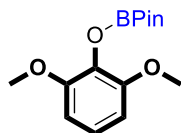

**2f: Protocol 1.** Colorless oil 0.221 g (99% yield).  $^1\text{H}$  NMR ( $\text{CDCl}_3$ , 300 MHz)  $\delta$  = 1.31 (s, 12H), 3.84 (s, 6H), 6.59 (d,  $J$  = 6 Hz, 2H), 6.96 (t,  $J$  = 9 Hz, 1H) ppm.  $^{13}\text{C}$  NMR ( $\text{CDCl}_3$ , 75 MHz)  $\delta$  = 24.6, 56.2, 83.5, 105.3, 122.9, 151.2 ppm.  $^{11}\text{B}$  NMR ( $\text{CDCl}_3$ , 96 MHz)  $\delta$  = 22.1 ppm. GCMS (m/z : Calc : 280.1 ; Exp : 280.1).

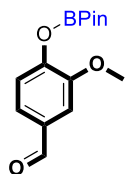

**2g: Protocol 1.** Colorless oil 0.211 g (95% yield).  $^1\text{H}$  NMR ( $\text{C}_6\text{D}_6$ , 500 MHz)  $\delta$  = 1.01 (s, 12H), 3.29 (s, 3H), 6.41 (d,  $J$  = 9Hz, 1H), 7.29 (d,  $J$  = 0Hz, 1H), 7.47 (s, 1H), 9.49 (s, 1H) ppm.  $^{13}\text{C}$  NMR ( $\text{C}_6\text{D}_6$ , 125 MHz)  $\delta$  = 24.6, 55.6, 83.8, 111.7, 121.0, 127.3, 130.5, 144.0, 155.7, 190.7 ppm.  $^{11}\text{B}$  NMR ( $\text{CDCl}_3$ , 96 MHz)  $\delta$  = 22.0 ppm. GCMS (m/z : Calc : 278.1 ; Exp : 278.1).

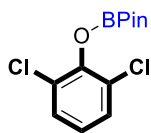

**2h: Protocol 1.** White solid 0.228 g (99% yield).  $^1\text{H}$  NMR ( $\text{CDCl}_3$ , 300 MHz)  $\delta$  = 1.33 (s, 12H), 6.99 (t,  $J$  = 7.5 Hz, 1H), 7.30 (d,  $J$  = 9 Hz, 2H) ppm.  $^{13}\text{C}$  NMR ( $\text{CDCl}_3$ , 75 MHz)  $\delta$  = 24.6, 84.5, 124.6, 17.3, 128.6, 146.8 ppm.  $^{11}\text{B}$  NMR ( $\text{CDCl}_3$ , 96 MHz)  $\delta$  = 21.6 ppm. GCMS (m/z : Calc : 289.0 ; Exp : 289.0).

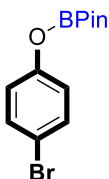

**2i: Protocol 1.** White solid 0.234 g (98% yield).  $^1\text{H}$  NMR ( $\text{CDCl}_3$ , 300 MHz)  $\delta$  = 1.34 (s, 12H), 7.00 (d,  $J$  = 9 Hz, 2H), 7.39 (d,  $J$  = 6 Hz, 2H) ppm.  $^{13}\text{C}$  NMR ( $\text{CDCl}_3$ , 75 MHz)  $\delta$  = 24.7, 83.9, 115.8, 121.5, 132.4, 152.7 ppm.  $^{11}\text{B}$  NMR ( $\text{CDCl}_3$ , 96 MHz)  $\delta$  = 21.7 ppm. GCMS (m/z : Calc : 299.0 ; Exp : 299.0).

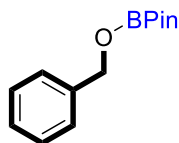

**2j: Protocol 1.** Colorless oil 0.178 g (95% yield).  $^1\text{H}$  NMR ( $\text{CDCl}_3$ , 300 MHz)  $\delta$  = 1.31 (s, 12H), 4.99 (s, 2H), 7.40 (m, 5H) ppm.  $^{13}\text{C}$  NMR ( $\text{CDCl}_3$ , 75 MHz)  $\delta$  = 24.7, 66.7, 83.0, 126.8, 127.4, 128.3, 139.3 ppm.  $^{11}\text{B}$  NMR ( $\text{CDCl}_3$ , 96 MHz)  $\delta$  = 22.5 ppm. GCMS (m/z : Calc : 234.1 ; Exp : 234.1).

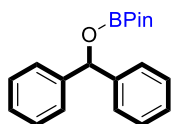

**2k: Protocol 1.** White solid 0.243 g (98% yield).  $^1\text{H}$  NMR ( $\text{CDCl}_3$ , 300 MHz)  $\delta$  = 1.28 (s, 12H), 6.29 (s, 1H), 7.30-7.49 (m, 10H) ppm.  $^{13}\text{C}$  NMR ( $\text{CDCl}_3$ , 75 MHz)  $\delta$  = 24.6, 83.1, 126.6, 127.4, 128.3, 143.2 ppm.  $^{11}\text{B}$  NMR ( $\text{CDCl}_3$ , 96 MHz)  $\delta$  = 22.5 ppm. GCMS (m/z : Calc : 310.2 ; Exp : 310.2).

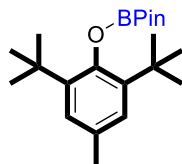

**2l: Protocol 3.** White solid 0.270 g (98% yield).  $^1\text{H}$  NMR ( $\text{CDCl}_3$ , 300 MHz)  $\delta$  = 1.29 (s, 12H), 1.42 (s, 18H), 2.29 (s, 3H), 7.04 (s, 2H) ppm.  $^{13}\text{C}$  NMR ( $\text{CDCl}_3$ , 75 MHz)  $\delta$  = 21.6, 25.4, 31.8, 35.3, 83.7, 126.5, 131.7, 140.7, 149.2 ppm.  $^{11}\text{B}$  NMR ( $\text{CDCl}_3$ , 96 MHz)  $\delta$  = 21.4 ppm. GCMS (m/z : Calc : 346.3 ; Exp : 346.3).

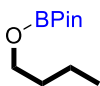

**2m: Protocol 1.** Colorless oil 0.150 g (99% yield).  $^1\text{H}$  NMR ( $\text{CDCl}_3$ , 300 MHz)  $\delta$  = 0.87 (t,  $J$  = 7.5 Hz, 3H), 1.21 (s, 12H), 1.29-1.34 (m, 2H), 1.37-1.53 (m, 2H), 3.80 (t,  $J$  = 6 Hz, 2H) ppm.  $^{13}\text{C}$  NMR ( $\text{CDCl}_3$ , 75 MHz)  $\delta$  = 13.7, 18.8, 24.6, 33.6, 64.6, 82.6 ppm.  $^{11}\text{B}$  NMR ( $\text{CDCl}_3$ , 96 MHz)  $\delta$  = 22.0 ppm. GCMS (m/z : Calc : 200.2 ; Exp : 200.2).

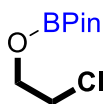

**2n: Protocol 1.** Colorless oil 0.163 g (99% yield).  $^1\text{H}$  NMR ( $\text{CDCl}_3$ , 300 MHz)  $\delta$  = 1.24 (s, 12H), 3.58 (t,  $J$  = 4.5 Hz, 2H), 4.05 (t,  $J$  = 4.5 Hz, 2H) ppm.  $^{13}\text{C}$  NMR ( $\text{CDCl}_3$ , 75 MHz)  $\delta$  = ppm.  $^{11}\text{B}$  NMR ( $\text{CDCl}_3$ , 96 MHz)  $\delta$  = ppm. GCMS (m/z : Calc : 206.1 ; Exp : 206.1).

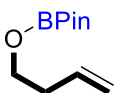

**2o: Protocol 1.** Colorless oil 0.155 g (98% yield).  $^1\text{H}$  NMR ( $\text{CDCl}_3$ , 300 MHz)  $\delta$  = 1.22 (s, 12H), 2.29-2.31 (m, 2H), 3.86 (m, 2H), 4.99-5.09 (m, 2H), 5.77-5.79 (m, 1H) ppm.  $^{13}\text{C}$  NMR ( $\text{CDCl}_3$ , 75 MHz)  $\delta$  = 24.6, 36.0, 64.1, 82.7, 116.9, 134.7 ppm.  $^{11}\text{B}$  NMR ( $\text{CDCl}_3$ , 96 MHz)  $\delta$  = 22.0 ppm. GCMS (m/z : Calc : 182.1 ; Exp : 182.1).



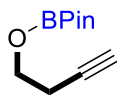

**2p: Protocol 1.** Colorless oil 0.150 g (96% yield).  $^1\text{H}$  NMR ( $\text{CDCl}_3$ , 300 MHz)  $\delta$  = 1.22, (s, 12H), 1.94 (s, 1H), 2.42 (m, 2H), 3.91 (t,  $J$  = 7.5 Hz, 2H) ppm.  $^{13}\text{C}$  NMR ( $\text{CDCl}_3$ , 75 MHz)  $\delta$  = 21.6, 24.6, 63.0, 69.7, 80.6, 83.0 ppm.  $^{11}\text{B}$  NMR ( $\text{CDCl}_3$ , 96 MHz)  $\delta$  = 22.1 ppm. GCMS (m/z : Calc : 196.1 ; Exp : 196.1).

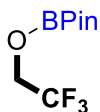

**2q: Protocol 1.** Colorless oil 0.173 g (95% yield).  $^1\text{H}$  NMR ( $\text{CDCl}_3$ , 300 MHz)  $\delta$  = 1.28 (s, 12H), 4.18 (q,  $J_{\text{H-F}}$  = 8 Hz, 2H) ppm.  $^{13}\text{C}$  NMR ( $\text{CDCl}_3$ , 75 MHz)  $\delta$  = 24.6, 62.8 (q,  $J_{\text{C-F}}$  = 35 Hz), 84.0, 123.8 (q,  $J_{\text{C-F}}$  = 272.5 Hz) ppm.  $^{11}\text{B}$  NMR ( $\text{CDCl}_3$ , 96 MHz)  $\delta$  = 22.4 ppm.  $^{19}\text{F}$  ( $\text{CDCl}_3$ , 96 MHz)  $\delta$  = 76.57 ppm. GCMS (m/z : Calc : 226.1 ; Exp : 226.1).

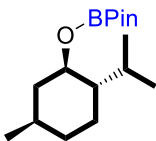

**2r: Protocol 1.** White solid 0.216 g (96% yield).  $^1\text{H}$  NMR ( $\text{CDCl}_3$ , 300 MHz)  $\delta$  = 0.75-1.08 (m, 12H), 1.22 (s, 12H), 1.43-1.64 (1.88-2.03 (m, 2H), 3.80 (q,  $J$  = 5 Hz, 1H) ppm.  $^{13}\text{C}$  NMR ( $\text{CDCl}_3$ , 75 MHz)  $\delta$  = 1.61, 21.1, 22.3, 23.0, 24.5, 24.7, 25.9, 31.5, 34.6, 43.8, 48.9, 74.3, 82.4 ppm.  $^{11}\text{B}$  NMR ( $\text{CDCl}_3$ , 96 MHz)  $\delta$  = 22.0 ppm. GCMS (m/z : Calc : 282.2 ; Exp : 282.2).

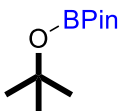

**2s: Protocol 1.** Colorless oil 0.153 g (96% yield).  $^1\text{H}$  NMR ( $\text{CDCl}_3$ , 300 MHz)  $\delta$  = 1.17 (s, 12H), 1.28 (s, 9H) ppm.  $^{13}\text{C}$  NMR ( $\text{CDCl}_3$ , 75 MHz)  $\delta$  = 24.5, 29.9, 73.8, 81.9 ppm.  $^{11}\text{B}$  NMR ( $\text{CDCl}_3$ , 96 MHz)  $\delta$  = 21.2 ppm. GCMS (m/z : Calc : 200.1 ; Exp : 200.1).

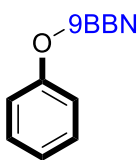

**2t: Protocol 1.** Colorless oil 0.152 g (96% yield).  $^1\text{H}$  NMR ( $\text{CDCl}_3$ , 300 MHz)  $\delta$  = 1.34 (m, 2H), 1.48-1.52 (m, 2H), 1.94 (m, br, 10H), 7.01 (d,  $J$  = 6 Hz, 2H), 7.17 (t,  $J$  = 6 Hz, 1H), 7.35 (t,  $J$  = 9 Hz, 2H) ppm.  $^{13}\text{C}$  NMR ( $\text{CDCl}_3$ , 75 MHz)  $\delta$  = 23.3, 24.6, 33.6, 120.4, 123.6, 129.5, 155.7 ppm.  $^{11}\text{B}$  NMR ( $\text{CDCl}_3$ , 96 MHz)  $\delta$  = 58.7 ppm. GCMS (m/z : Calc : 198.2 ; Exp : 198.2).

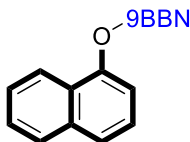

**2u: Protocol 1.** White solid 0.186 g (94% yield).  $^1\text{H}$  NMR ( $\text{CDCl}_3$ , 300 MHz)  $\delta$  = 1.36 (m, br, 2H), 1.54 (m, br, 2H), 1.97 (m, br, 12H), 7.06 (d, br,  $J$  = 6 Hz, 1H), 7.48-7.69 (m, 4H), 7.93 (d, br, 1H), 8.13 (d, br, 1H) ppm.  $^{13}\text{C}$  NMR ( $\text{CDCl}_3$ , 75 MHz)  $\delta$  = 23.4, 24.8, 33.8, 115.1, 121.9, 123.6, 125.9, 126.0, 126.5, 127.1, 128.0, 134.9, 151.9 ppm.  $^{11}\text{B}$  NMR ( $\text{CDCl}_3$ , 96 MHz)  $\delta$  = 59.4 ppm. GCMS (m/z : Calc : 248.2 ; Exp : 248.2).

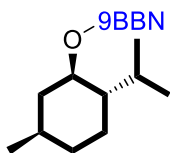

**2v: Protocol 1.** White solid 0.201 g (97% yield).  $^1\text{H}$  NMR ( $\text{CDCl}_3$ , 300 MHz)  $\delta$  = 0.76-1.11 (m, 11H), 1.15-1.43 (m, 7H), 1.69-2.08 (m, 14H), 3.96 (m, 1H) ppm.  $^{13}\text{C}$  NMR ( $\text{CDCl}_3$ , 75 MHz)  $\delta$  = 16.1, 21.0, 22.3, 23.4, 24.5, 25.9, 31.7, 33.3, 33.6, 34.6, 44.9, 48.6, 75.2 ppm.  $^{11}\text{B}$  NMR ( $\text{CDCl}_3$ , 96 MHz)  $\delta$  = 55.9 ppm. GCMS (m/z : Calc : 248.2 ; Exp : 248.2).

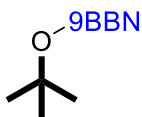

**2w: Protocol 1.** Colorless oil 0.134 g (95% yield).  $^1\text{H}$  NMR ( $\text{CDCl}_3$ , 300 MHz)  $\delta$  = 1.32 (m, br, 3H), 1.42 (s, 9H), 1.82-1.88 (m, br, 11H) ppm.  $^{13}\text{C}$  NMR ( $\text{CDCl}_3$ , 75 MHz)  $\delta$  = 23.2, 26.4, 31.2, 33.3, 74.9 ppm.  $^{11}\text{B}$  NMR ( $\text{CDCl}_3$ , 96 MHz)  $\delta$  = 55.6 ppm. GCMS (m/z : Calc : 178.1 ; Exp : 178.1).

## G. Compounds 3a-d

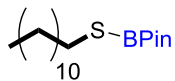

**3a: Protocol 3.** Colorless oil (95% yield).  $^1\text{H}$  NMR ( $\text{C}_6\text{D}_6$ , 500 MHz)  $\delta$  = 0.93 (t,  $J$  = 5 Hz, 3H), 1.02 (s, 12H), 1.17-1.39 (m, 19H), 1.41 (quint,  $J$  = 5 Hz, 19H), 2.22 (q, 5 Hz, 2 H) ppm.  $^{13}\text{C}$  NMR ( $\text{C}_6\text{D}_6$ , 125 MHz)  $\delta$  = 14.9, 23.7, 25.5, 29.3, 30.1, 30.4, 30.6, 30.7, 35.0, 83.7.  $^{11}\text{B}$  NMR ( $\text{CDCl}_3$ , 96 MHz)  $\delta$  = 33.5 ppm. GCMS ( $m/z$  : Calc : 328.3 ; Exp : 328.3).

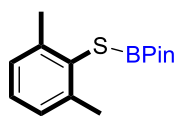

**3b: Protocol 3.** Colorless oil (95% yield).  $^1\text{H}$  NMR ( $\text{C}_6\text{D}_6$ , 500 MHz)  $\delta$  = 1.32 (s, 12 H), 2.53 (s, 6H), 7.16 (m, 3H) ppm.  $^{13}\text{C}$  NMR ( $\text{C}_6\text{D}_6$ , 125 MHz)  $\delta$  = 22.9, 24.5, 85.1, 127.5, 127.9, 142.2 ppm.  $^{11}\text{B}$  NMR ( $\text{CDCl}_3$ , 96 MHz)  $\delta$  = 32.4 ppm. GCMS ( $m/z$  : Calc : 264.1 ; Exp : 264.1).

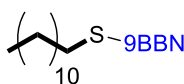

**3c: Protocol 3.** Colorless oil (95% yield).  $^1\text{H}$  NMR ( $\text{C}_6\text{D}_6$ , 500 MHz)  $\delta$  = 0.88 (bt,  $J$  = 5 Hz, 3H), 1.26 (s, 16H), 1.38 (m, 4H), 1.58 (m, 3H), 1.74 (m, 4H), 1.80-1.95 (m, 7H) ppm.  $^{13}\text{C}$  NMR ( $\text{C}_6\text{D}_6$ , 125 MHz)  $\delta$  = 14.3, 22.9, 23.3, 26.6, 28.7, 28.9, 29.4, 29.6, 29.7, 29.8, 29.8, 29.9, 32.1, 32.6, 33.5, 33.9 ppm.  $^{11}\text{B}$  NMR ( $\text{CDCl}_3$ , 96 MHz)  $\delta$  = 77.7 ppm. GCMS ( $m/z$  : Calc : 322.3 ; Exp : 322.3).

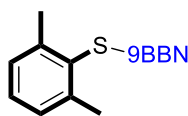

**3d: Protocol 3.** White solid (95% yield).  $^1\text{H}$  NMR ( $\text{CDCl}_3$ , 500 MHz)  $\delta$  = 1.39 (m, 2H), 1.62 (m, 2H), 1.70 (m, 2H) 1.89-1.94 (m, 8H), 2.41 (s, 6H), 7.13 (s, 3H) ppm.  $^{13}\text{C}$  NMR ( $\text{C}_6\text{D}_6$ , 125 MHz)  $\delta$  = 22.9, 23.1, 27.4, 29.7, 33.5, 34.0, 127.5, 128.0, 132.4, 141.1 ppm.  $^{11}\text{B}$  NMR ( $\text{CDCl}_3$ , 96 MHz)  $\delta$  = 77.7 ppm. GCMS ( $m/z$  : Calc : 258.2 ; Exp : 258.2).

## H. Spectra

1a

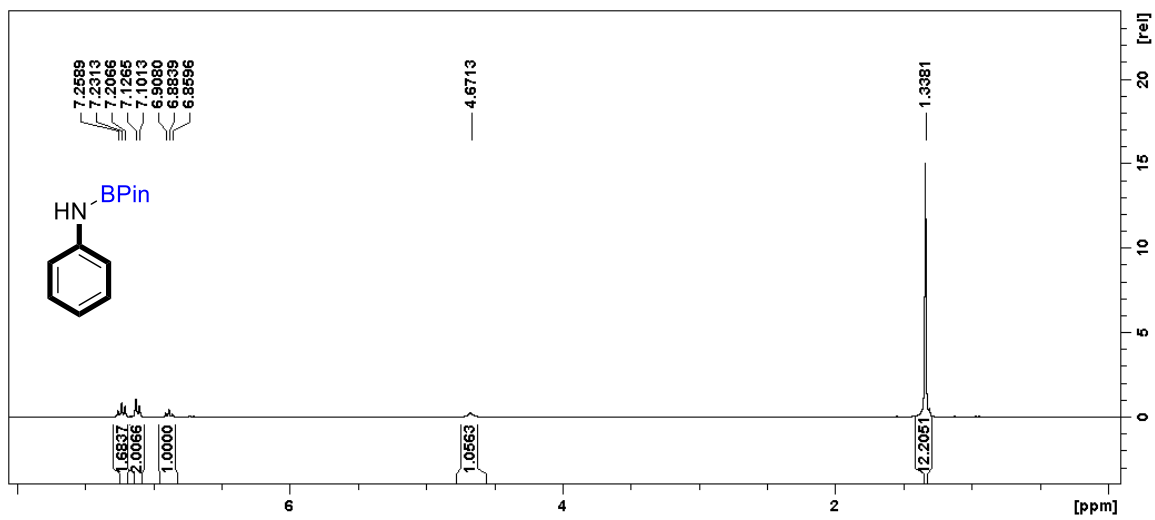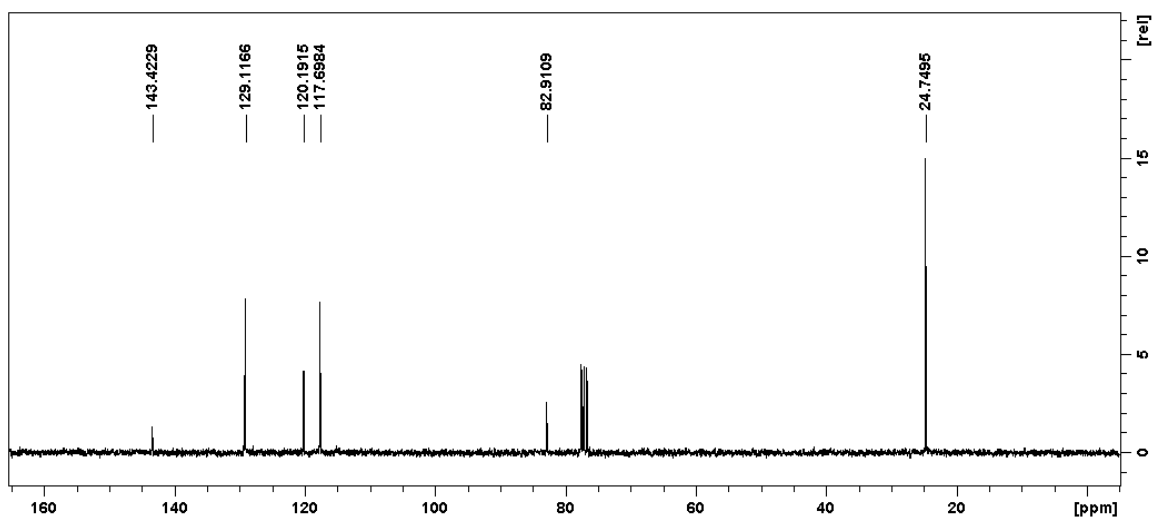

1b

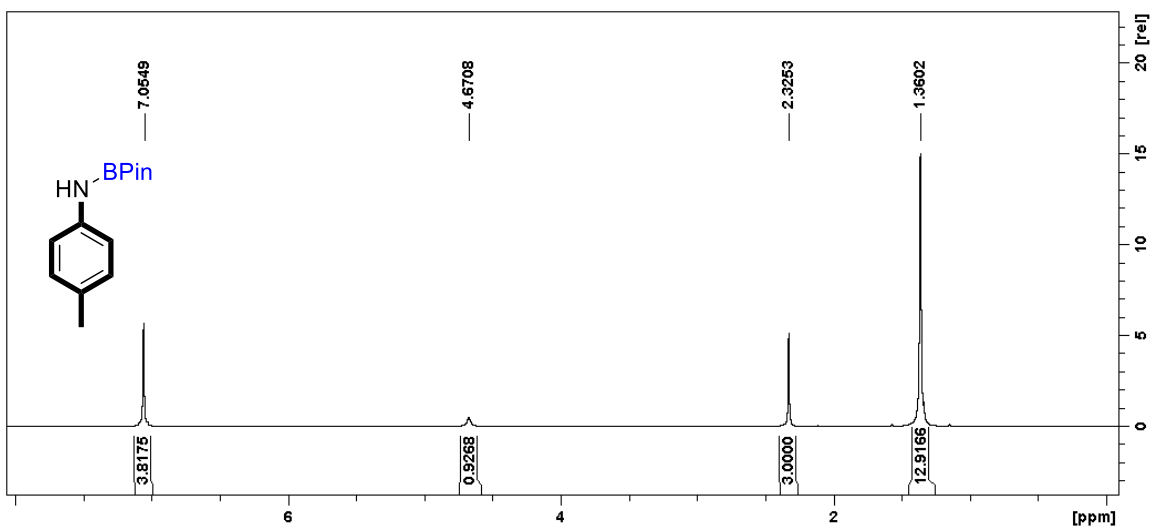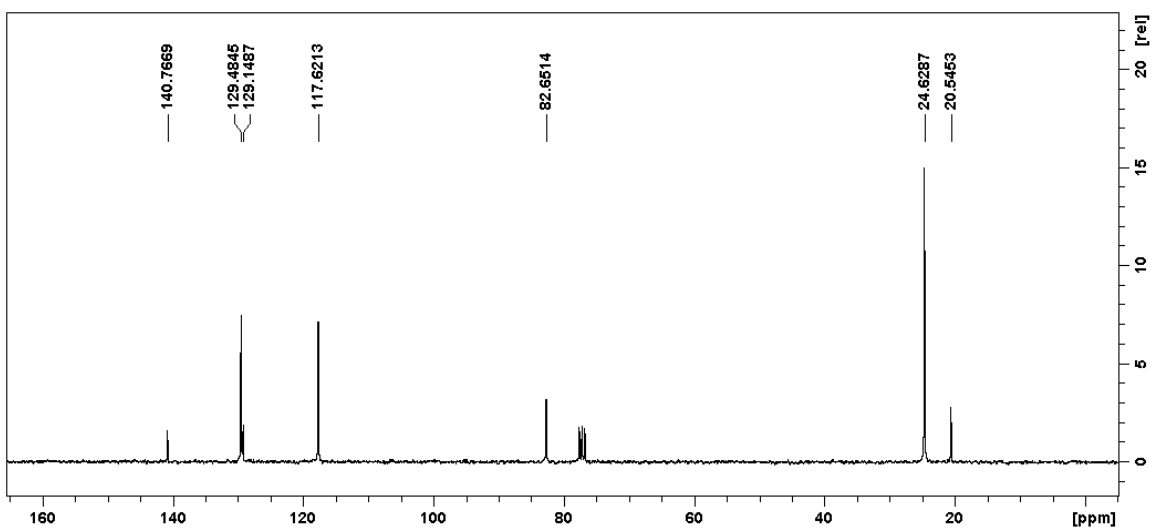

1c

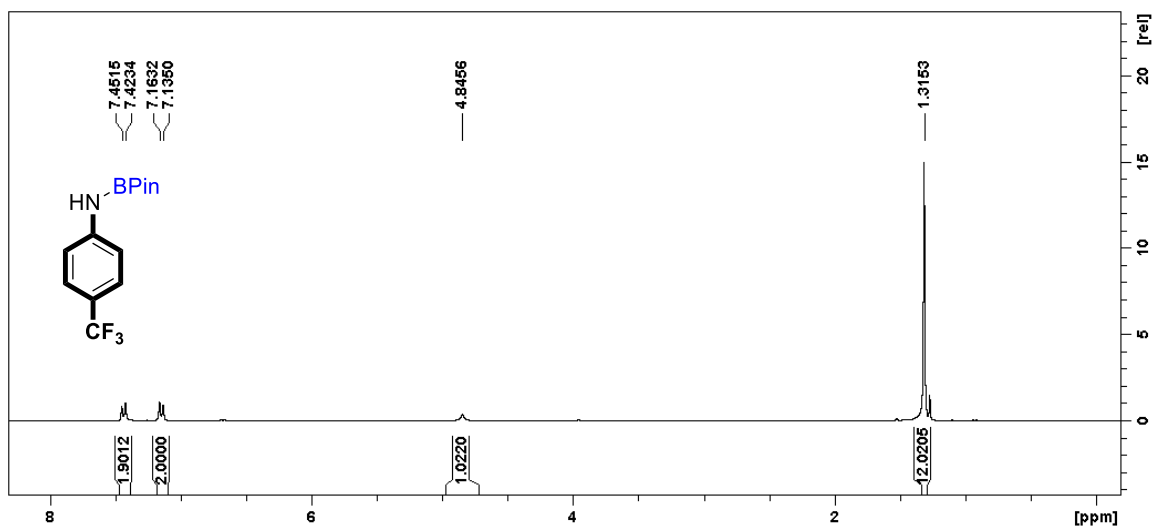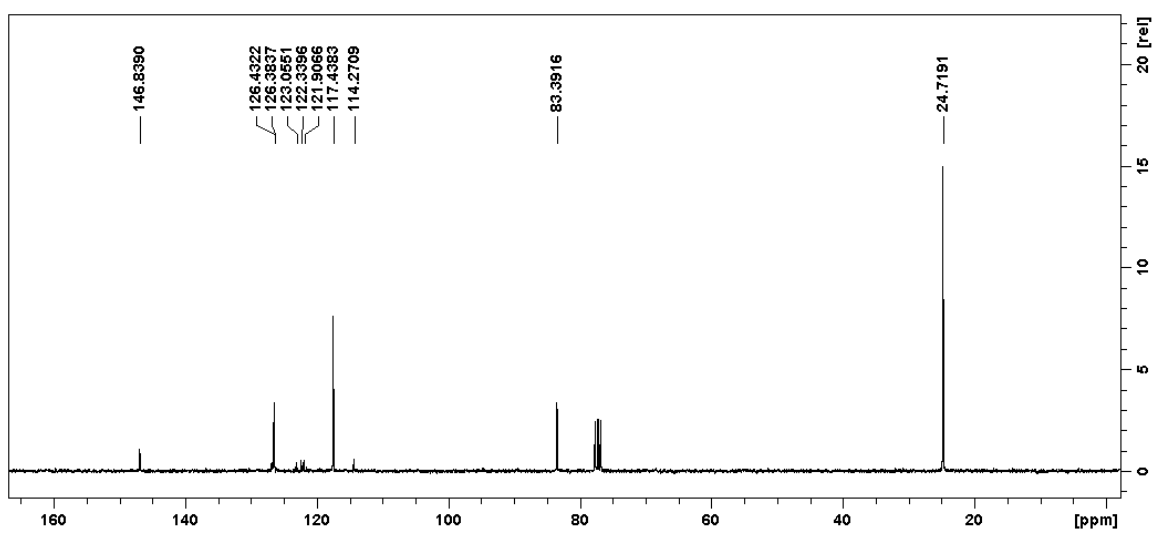

1d

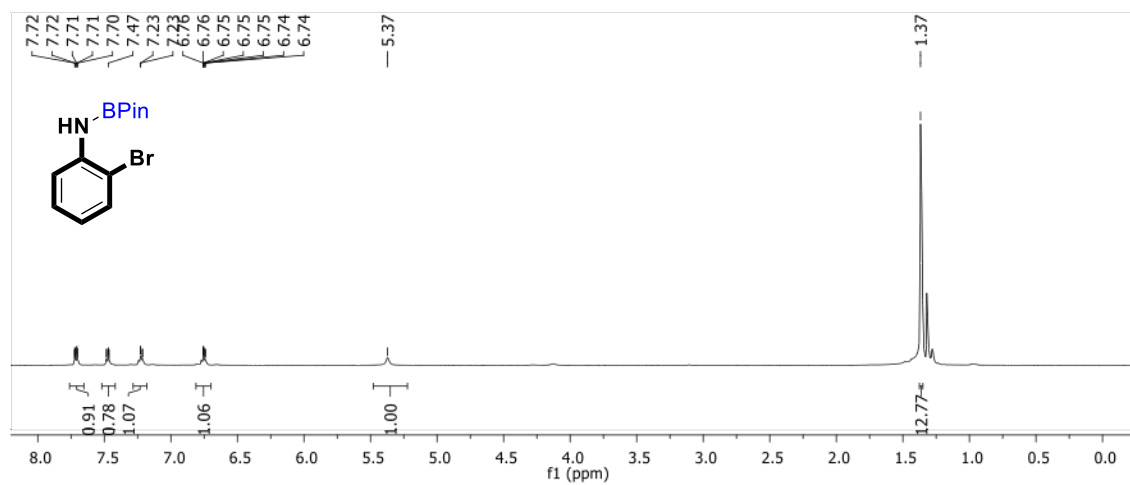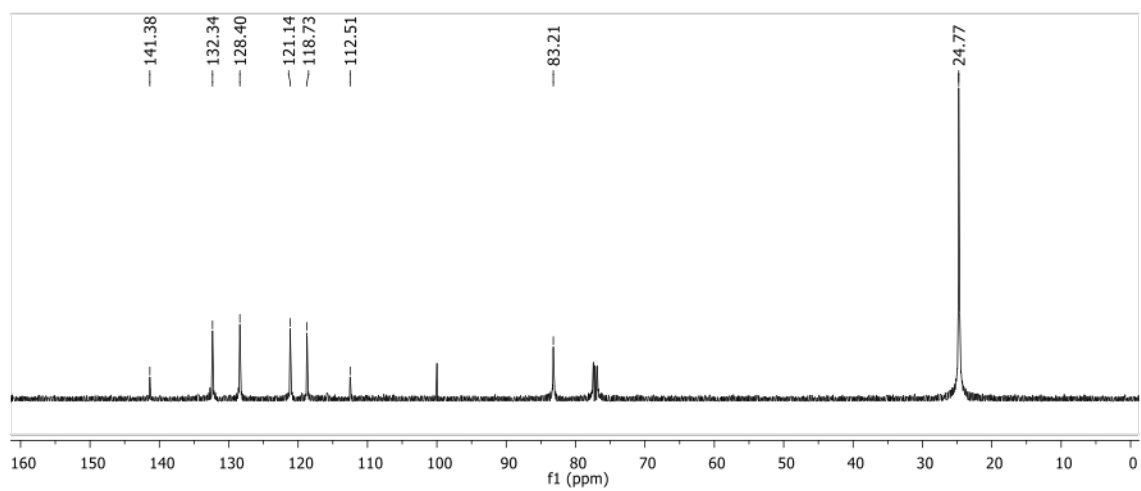

1e

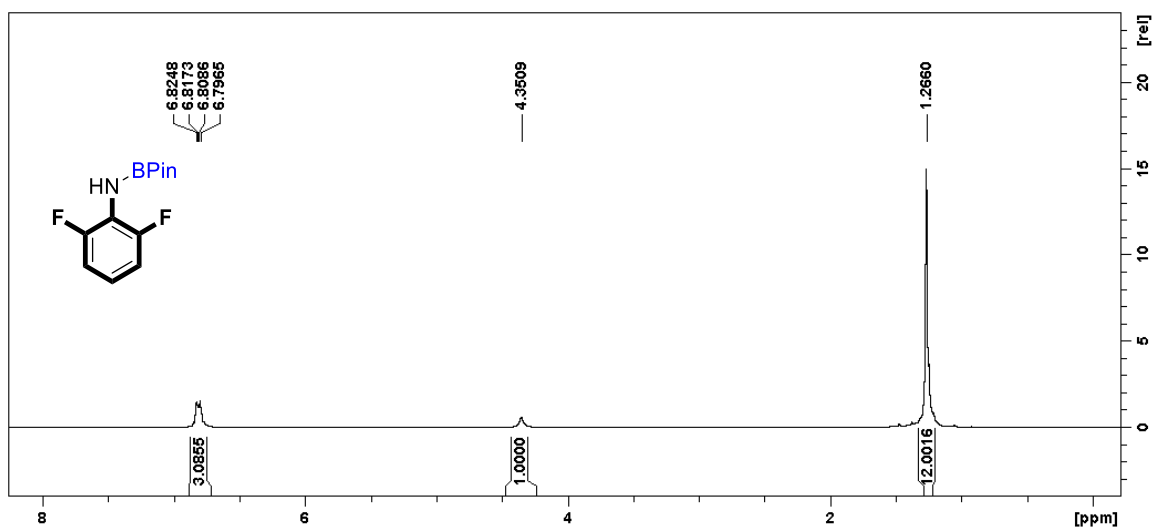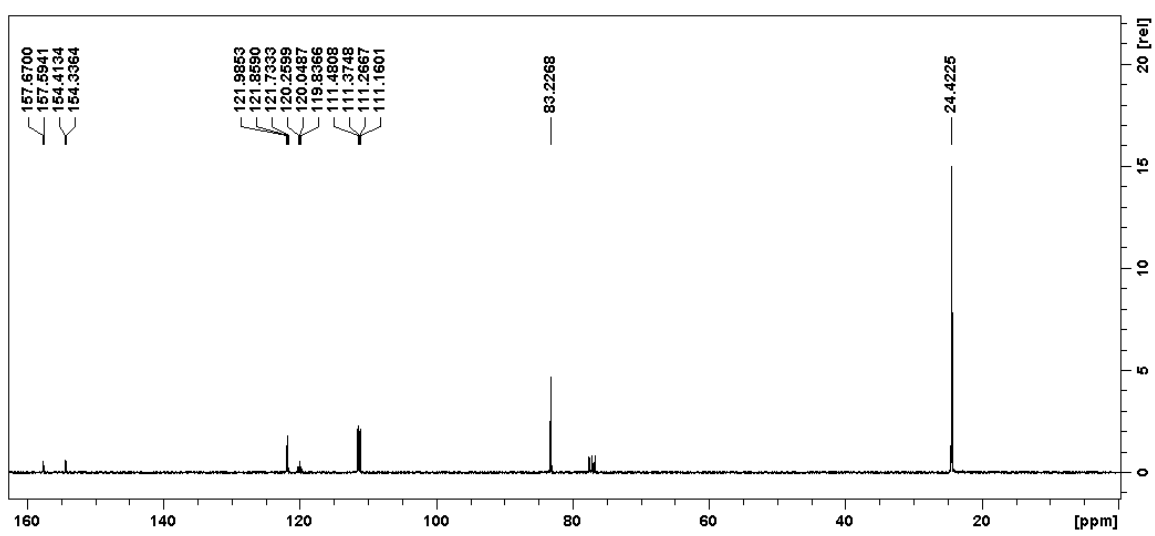

1f

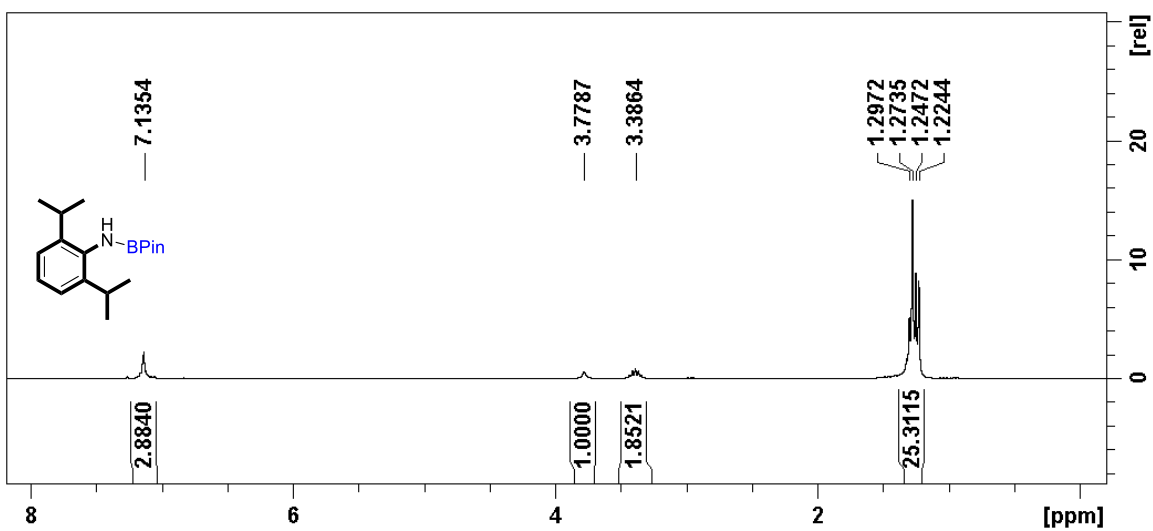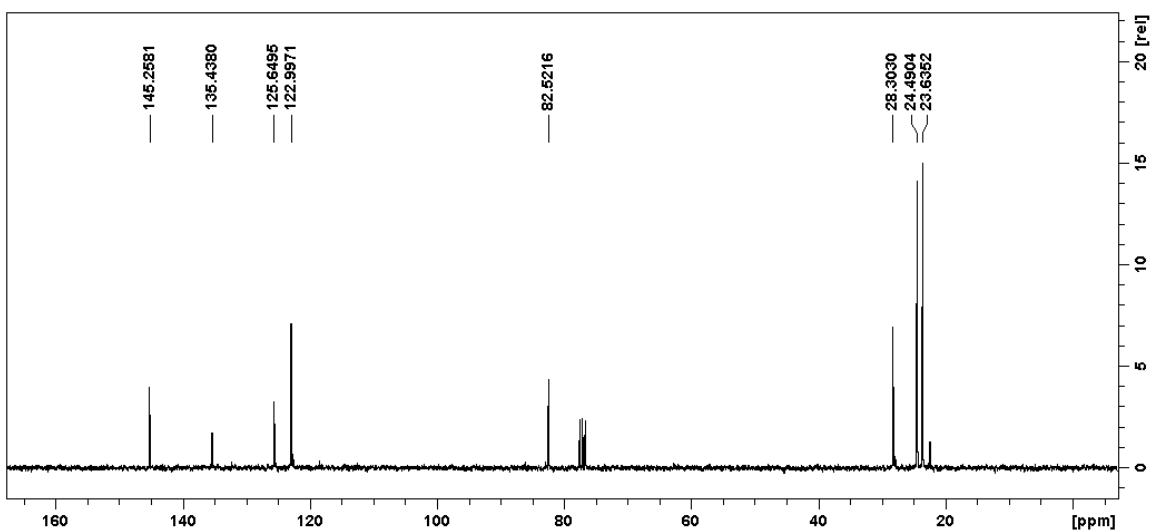



1g

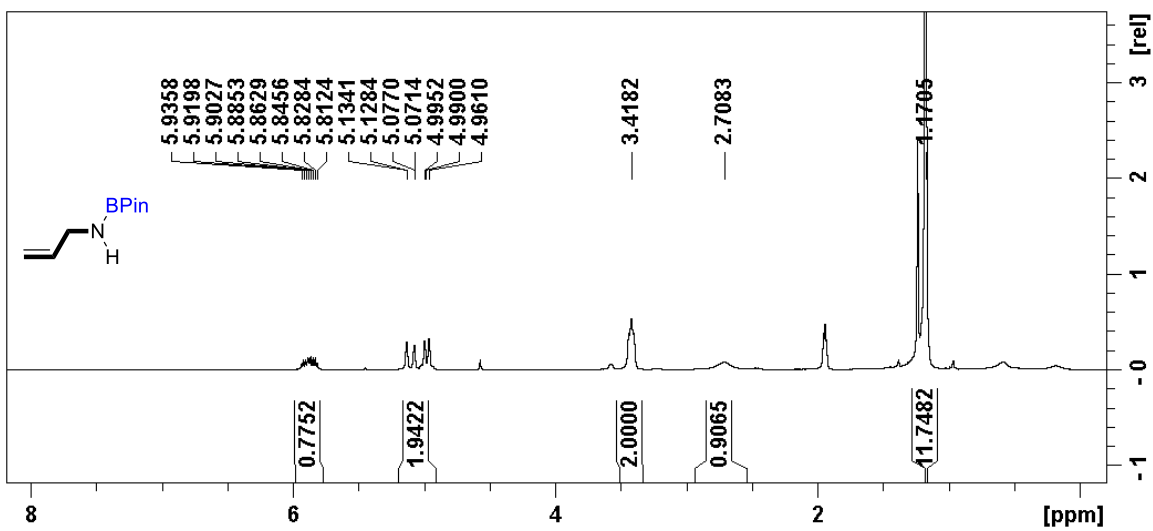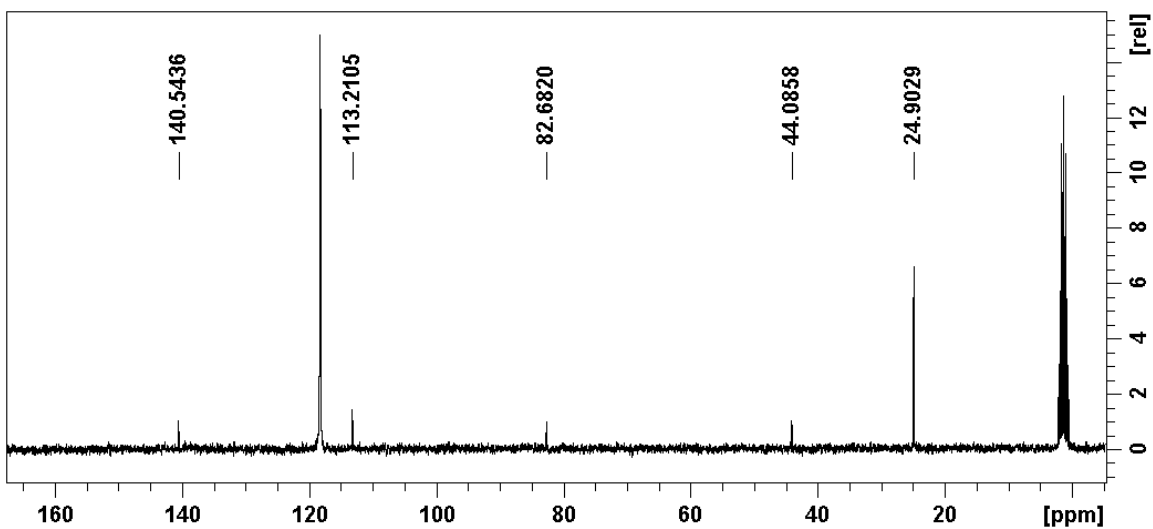

1h

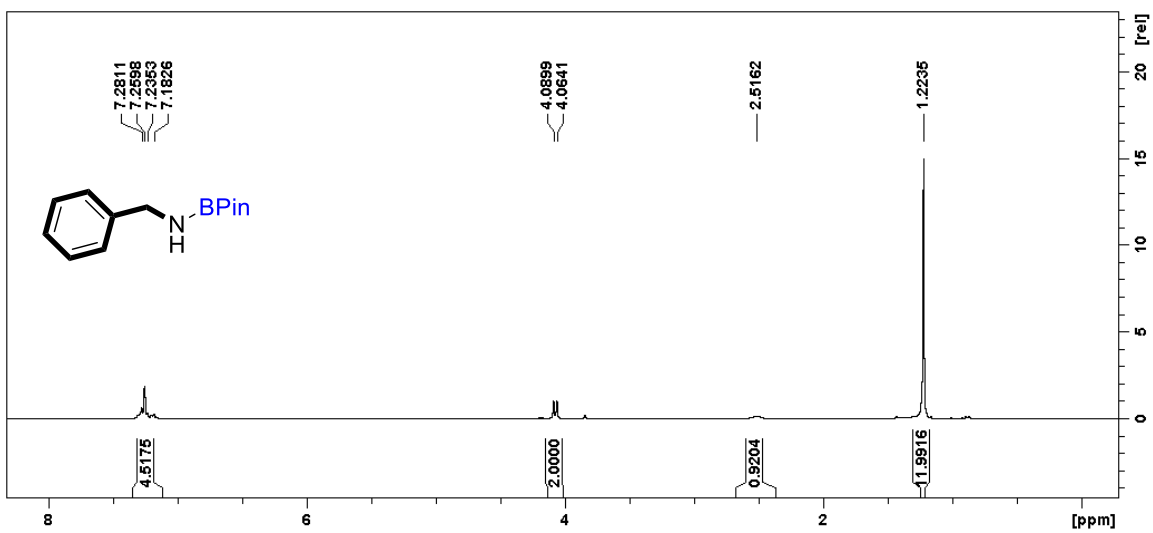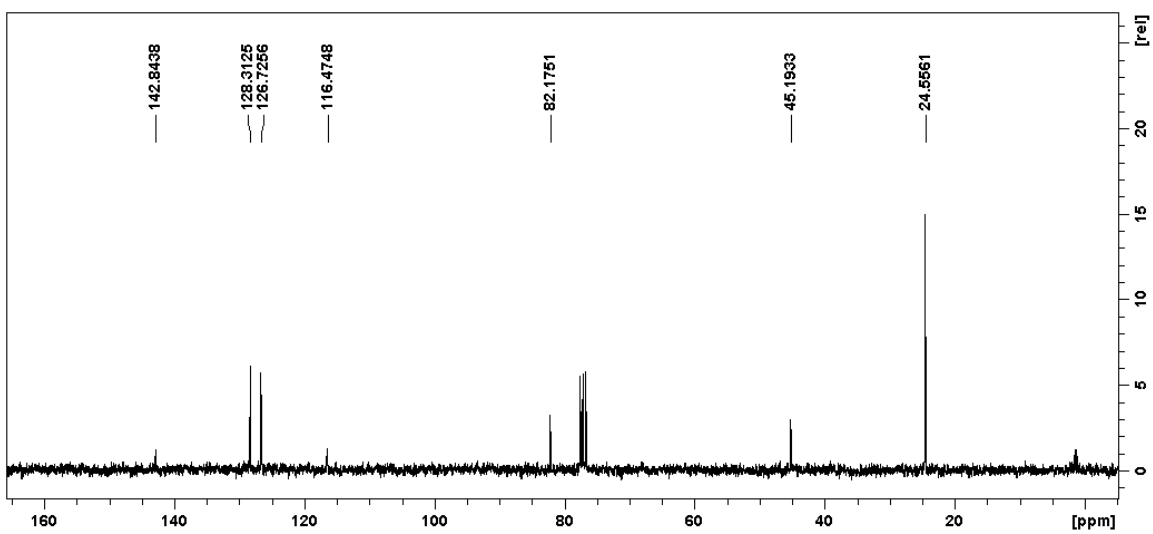

1i

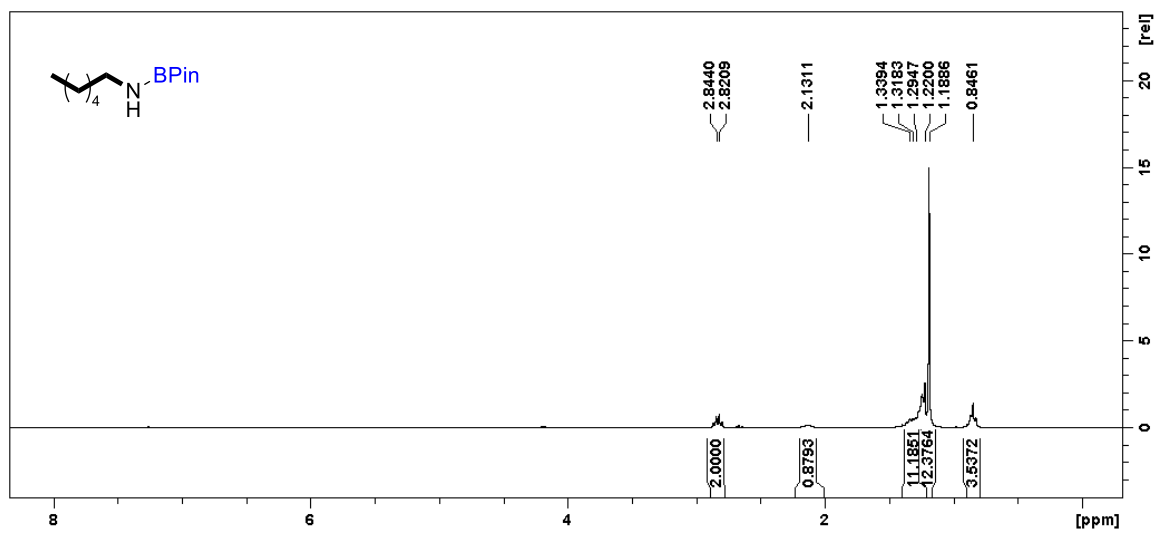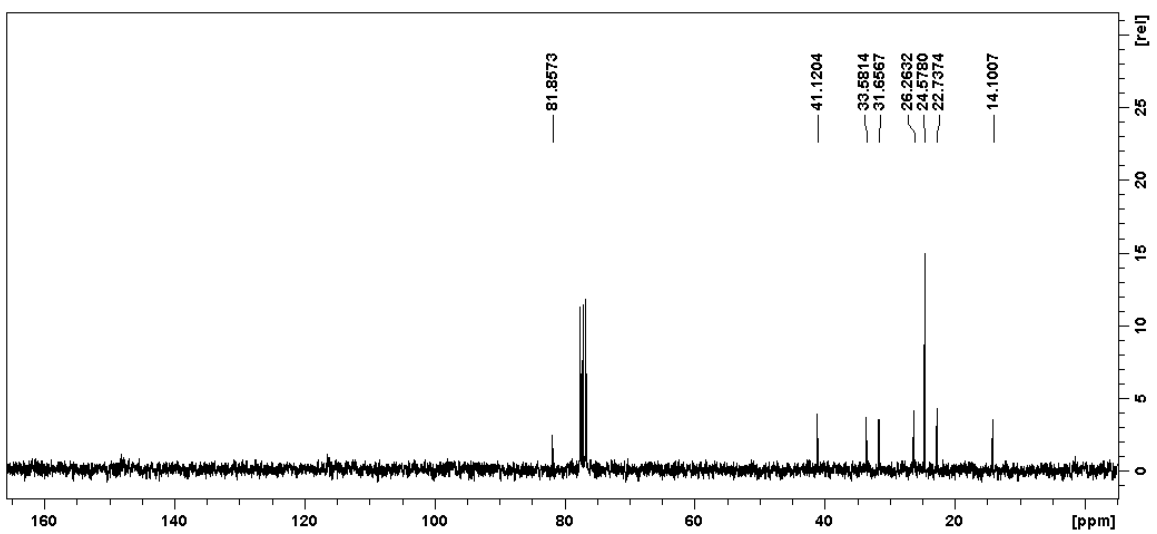

1j

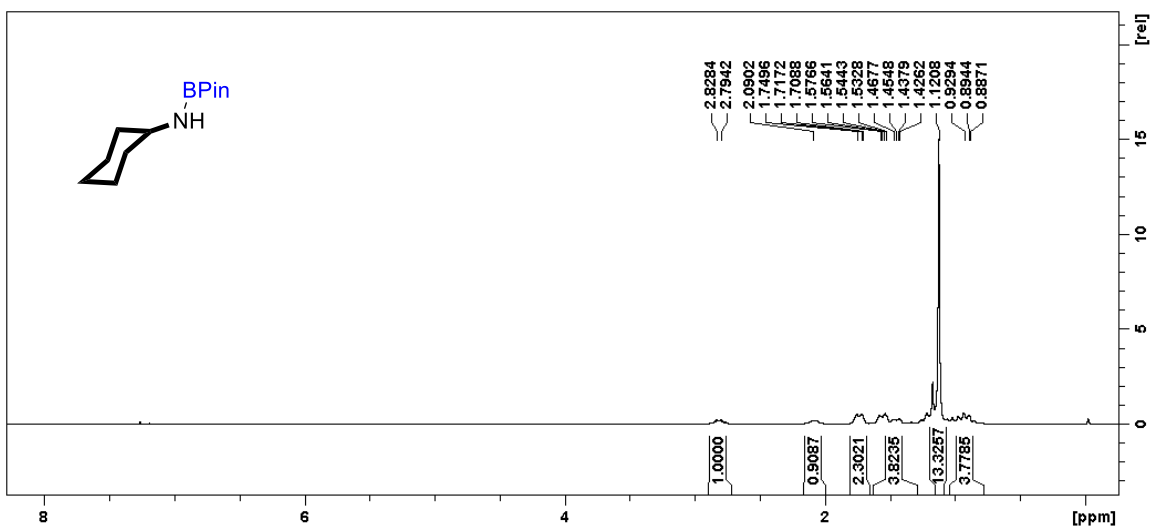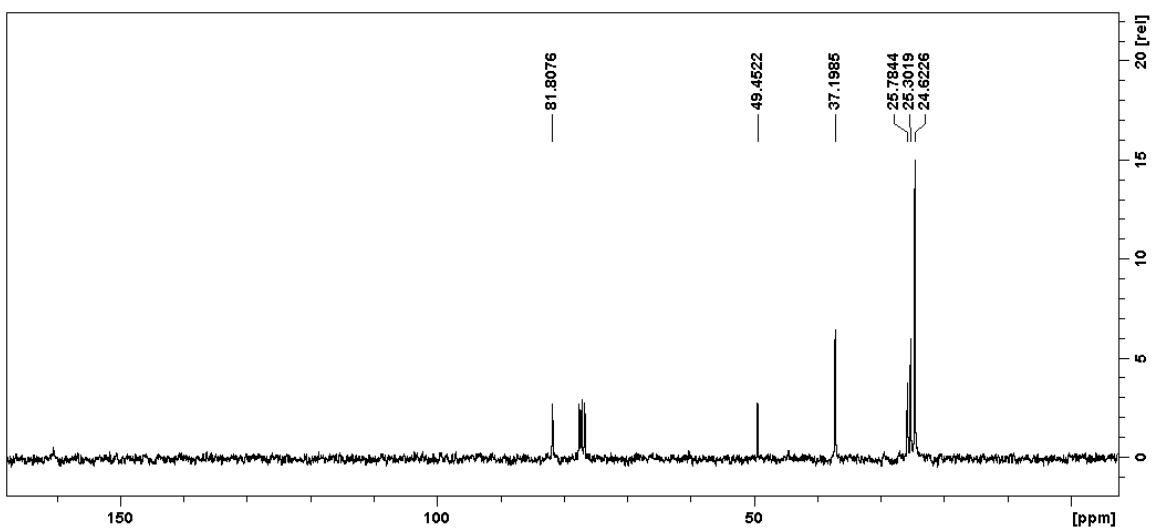

1k

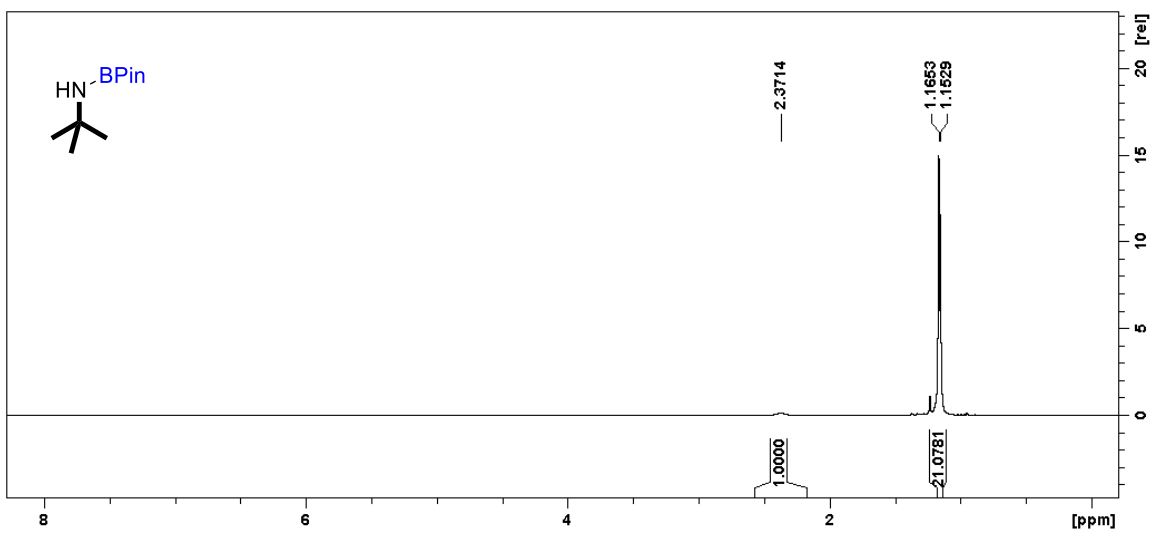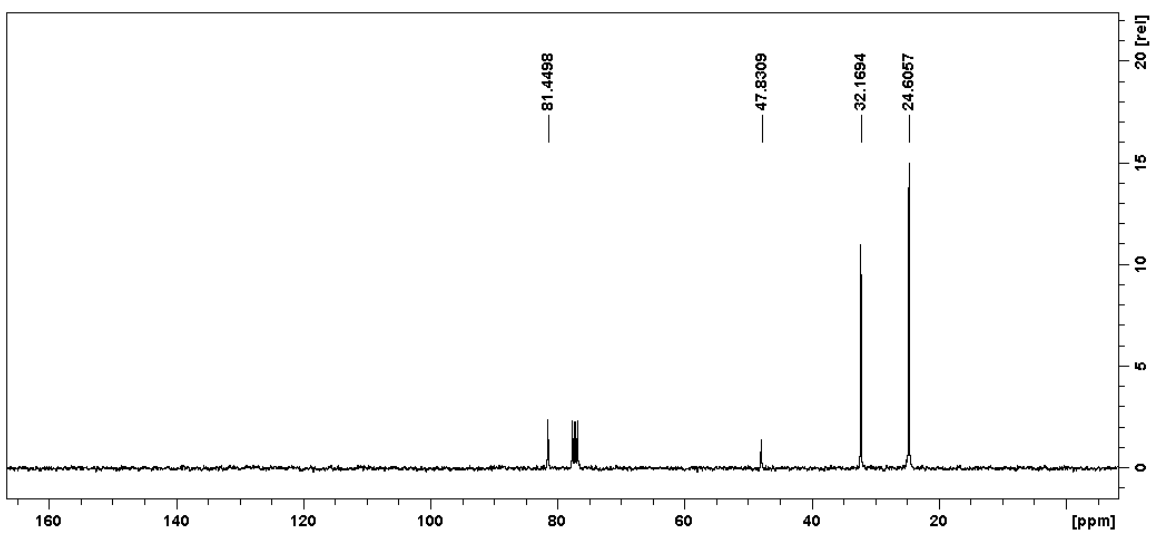

11

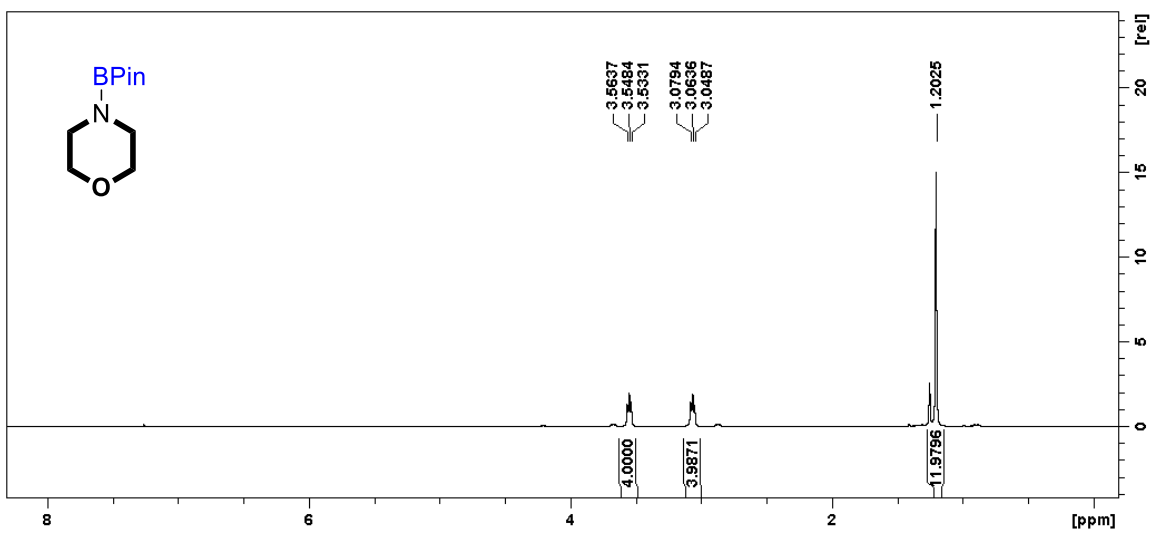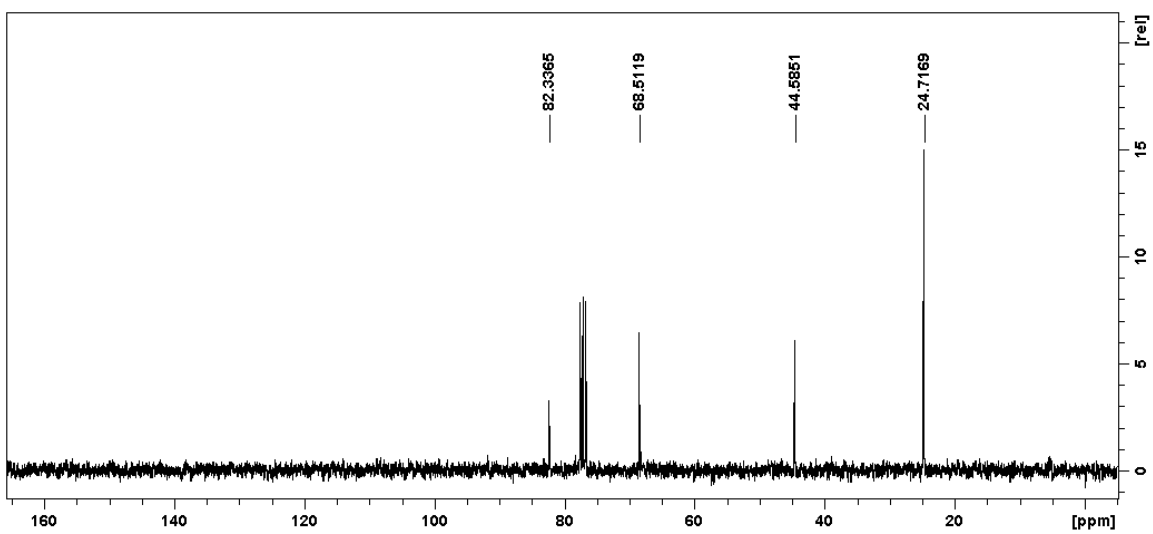

1m

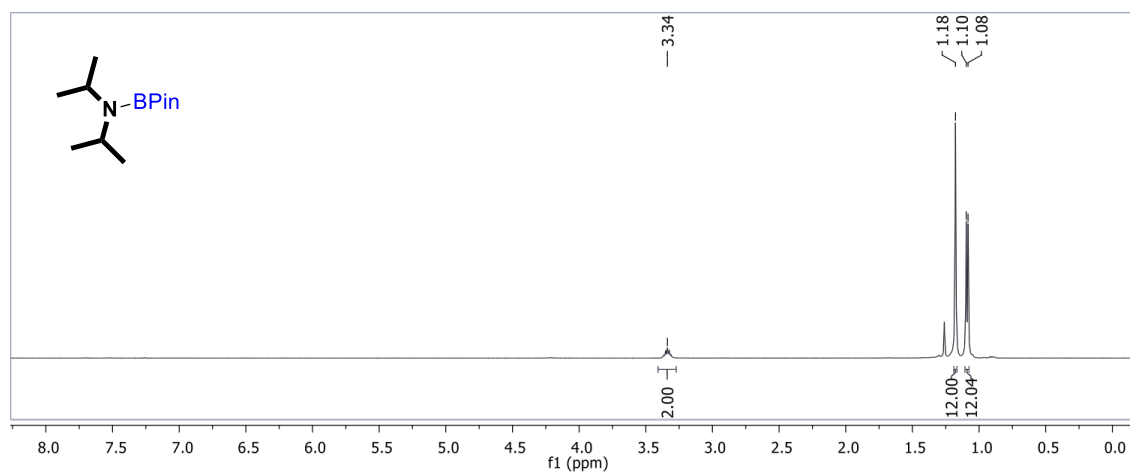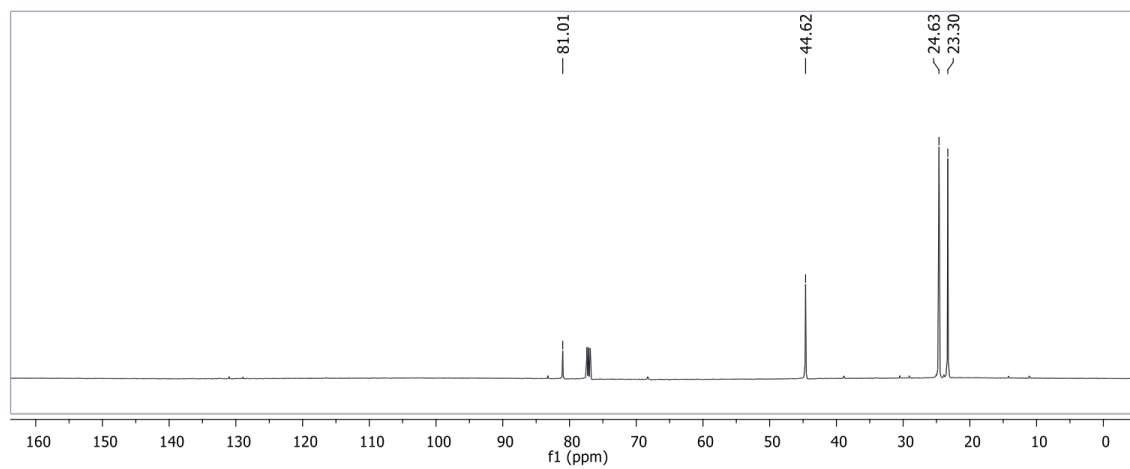

1n

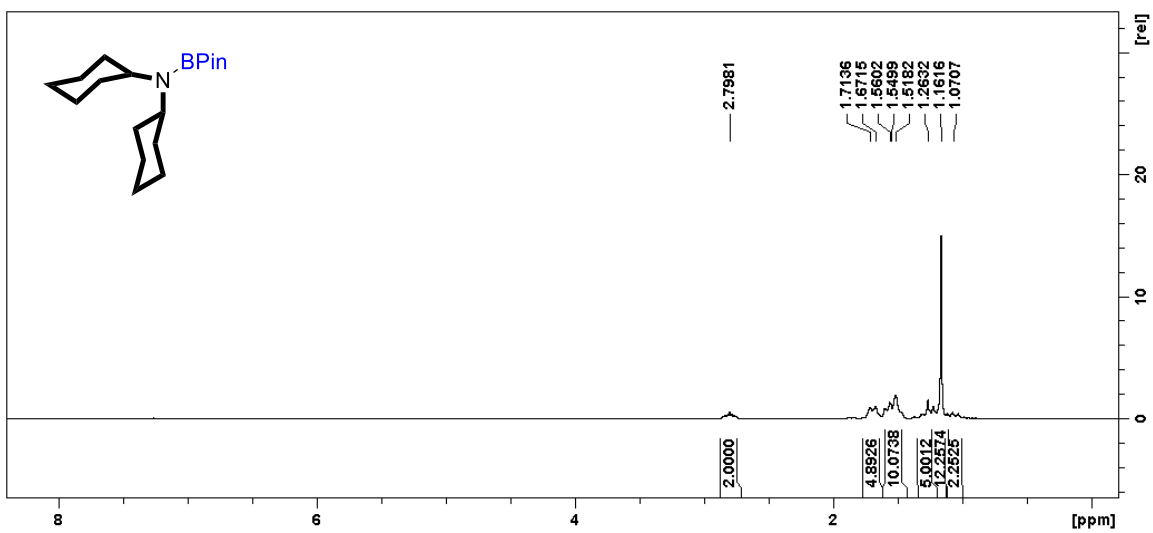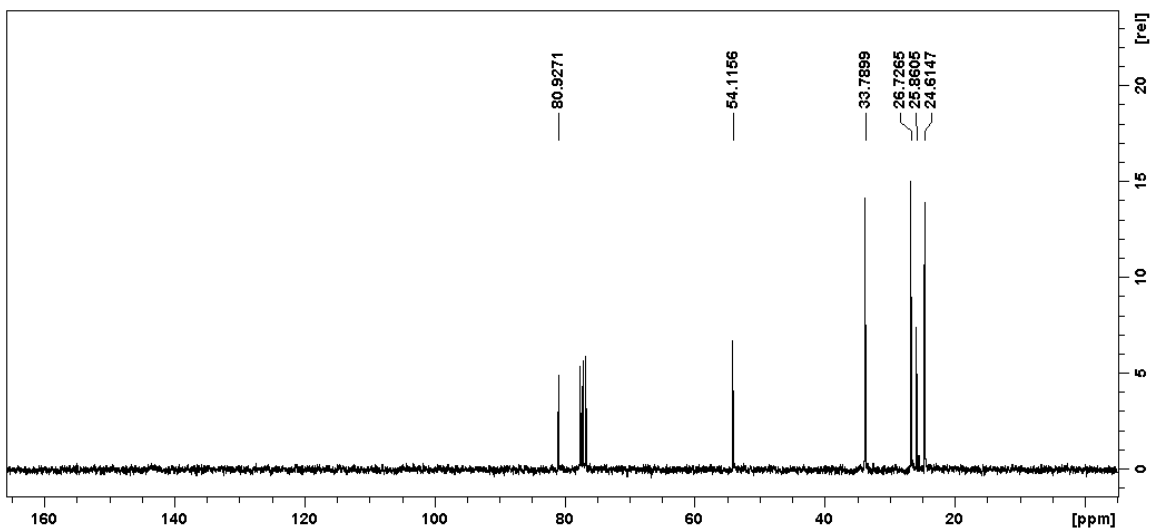



10

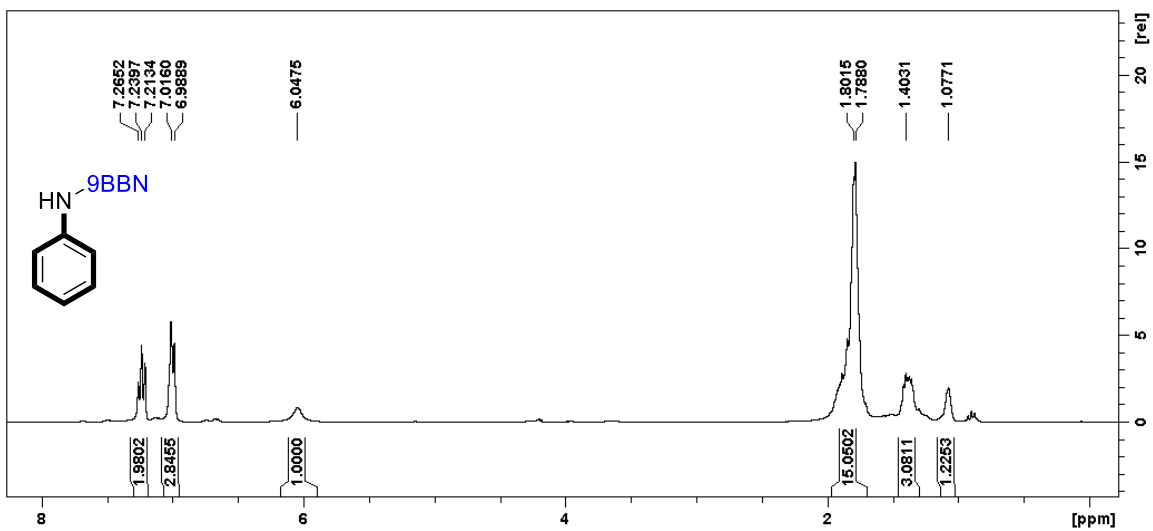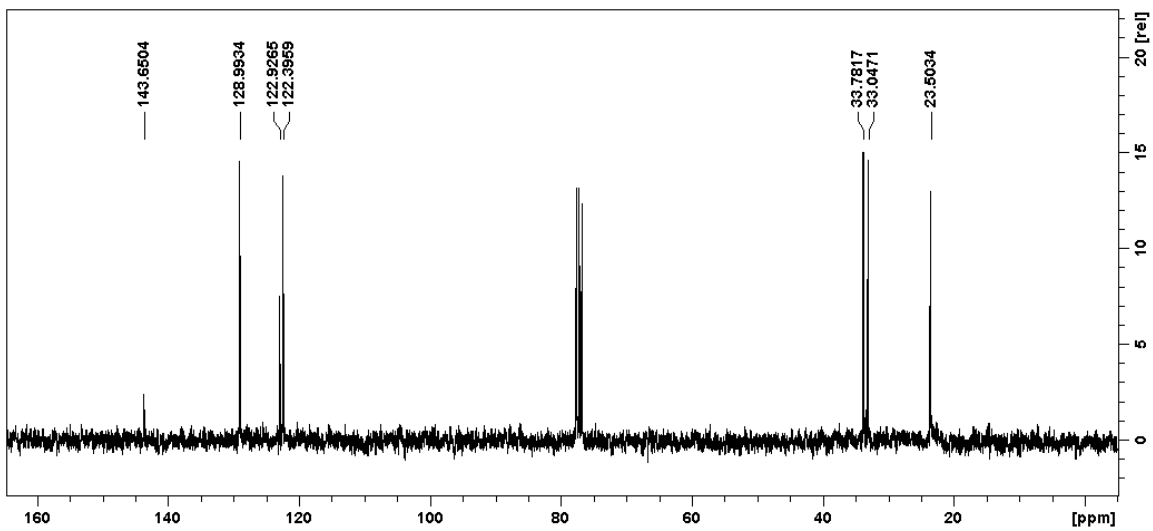

1p

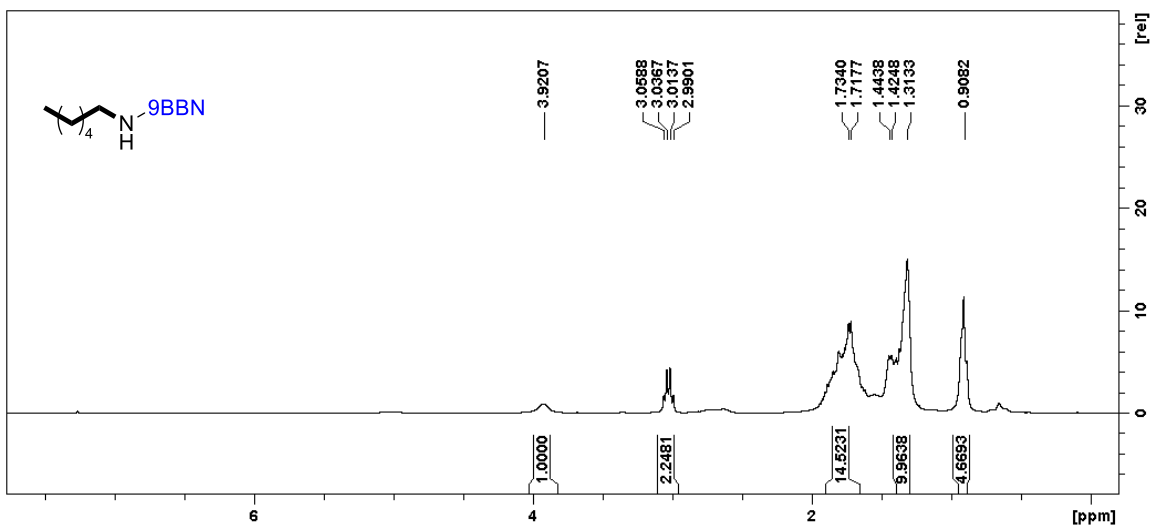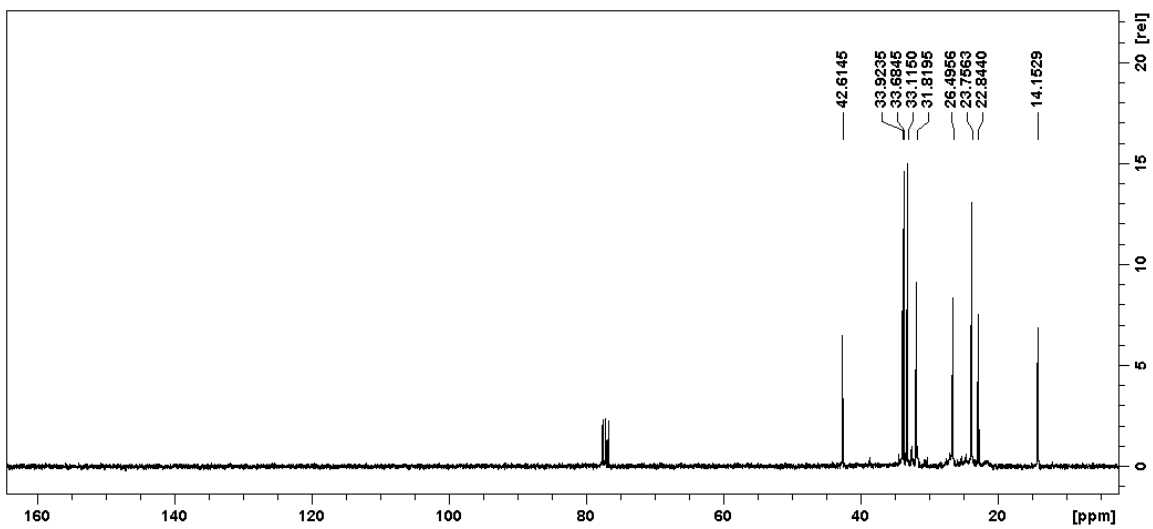

1q

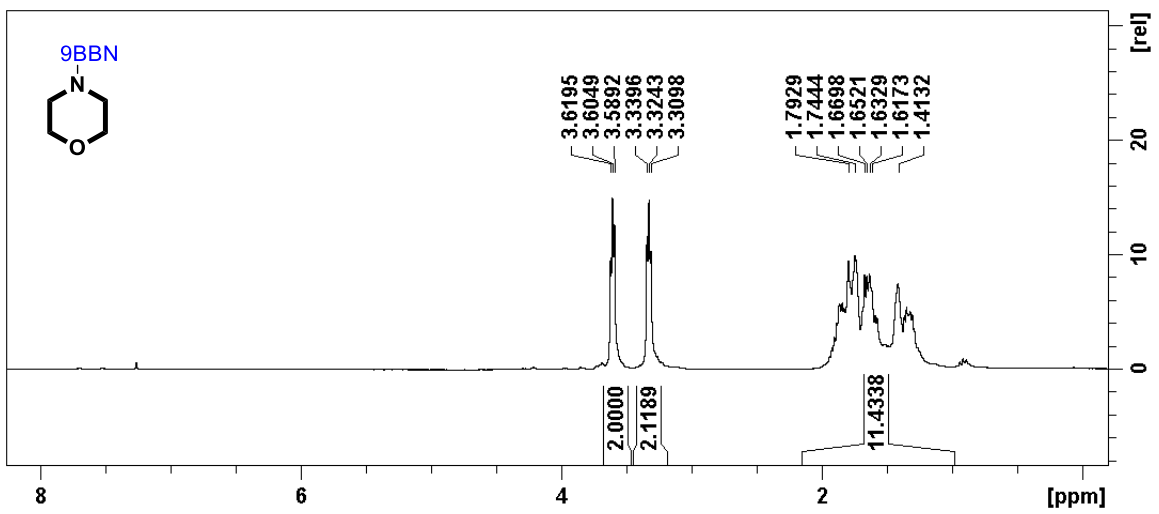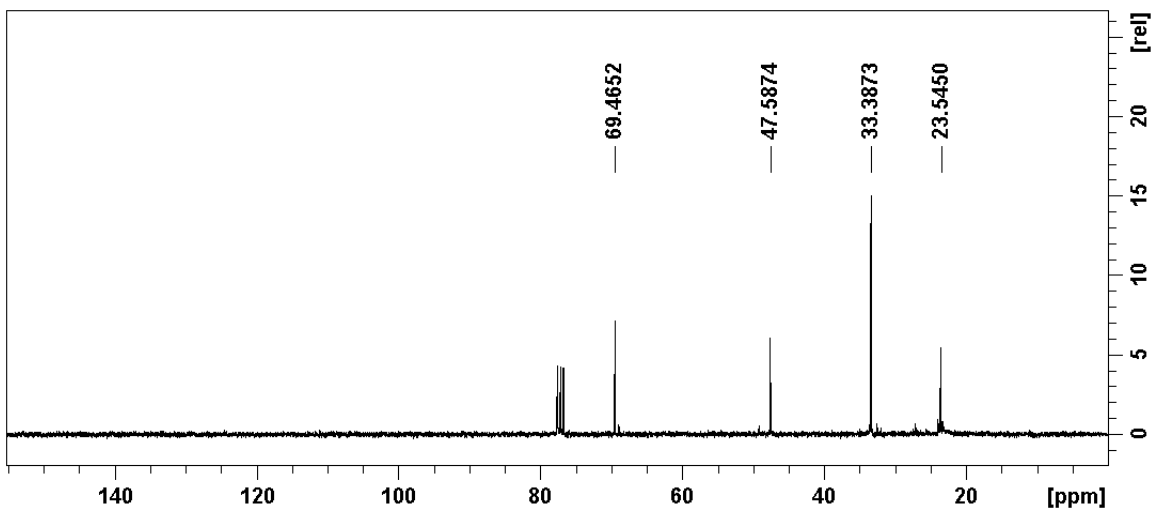

1r

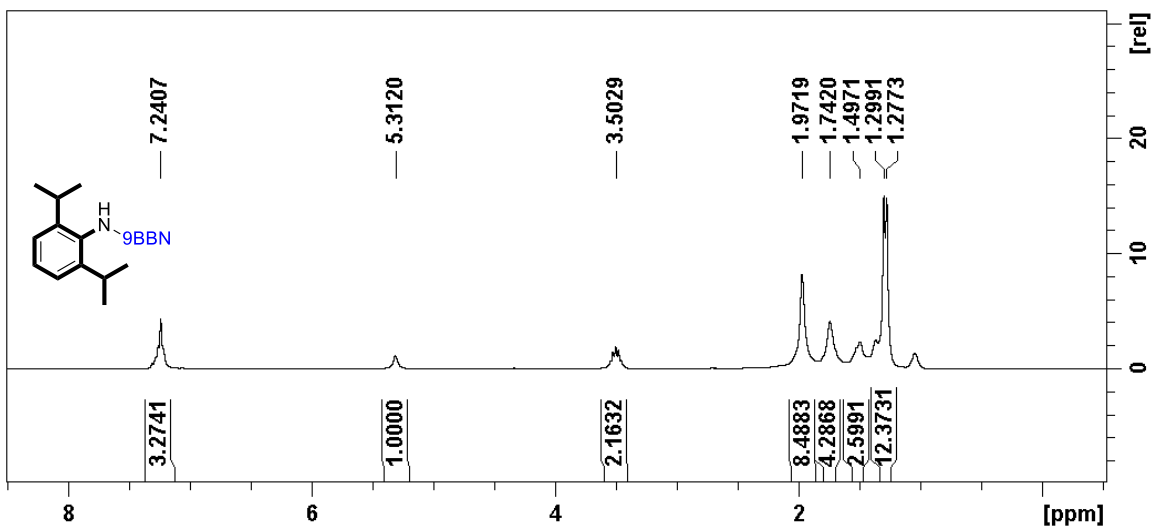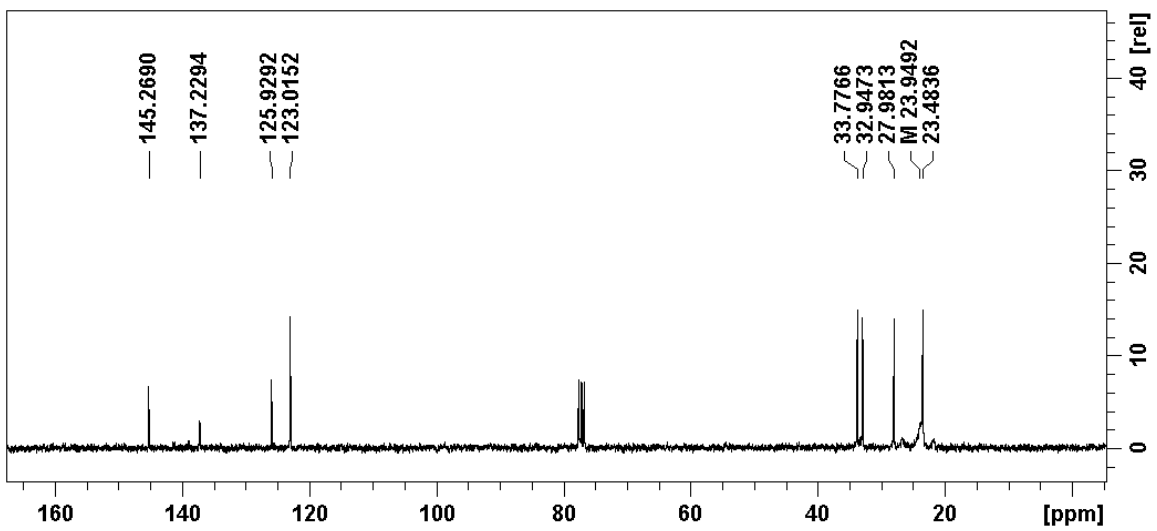

2a

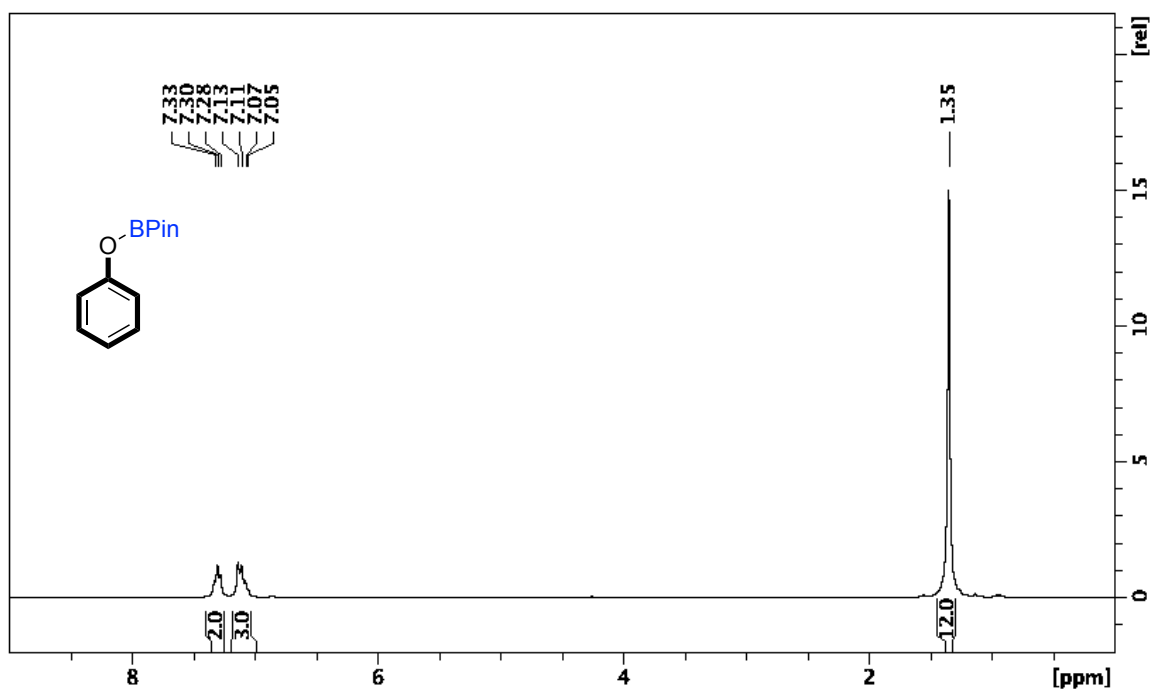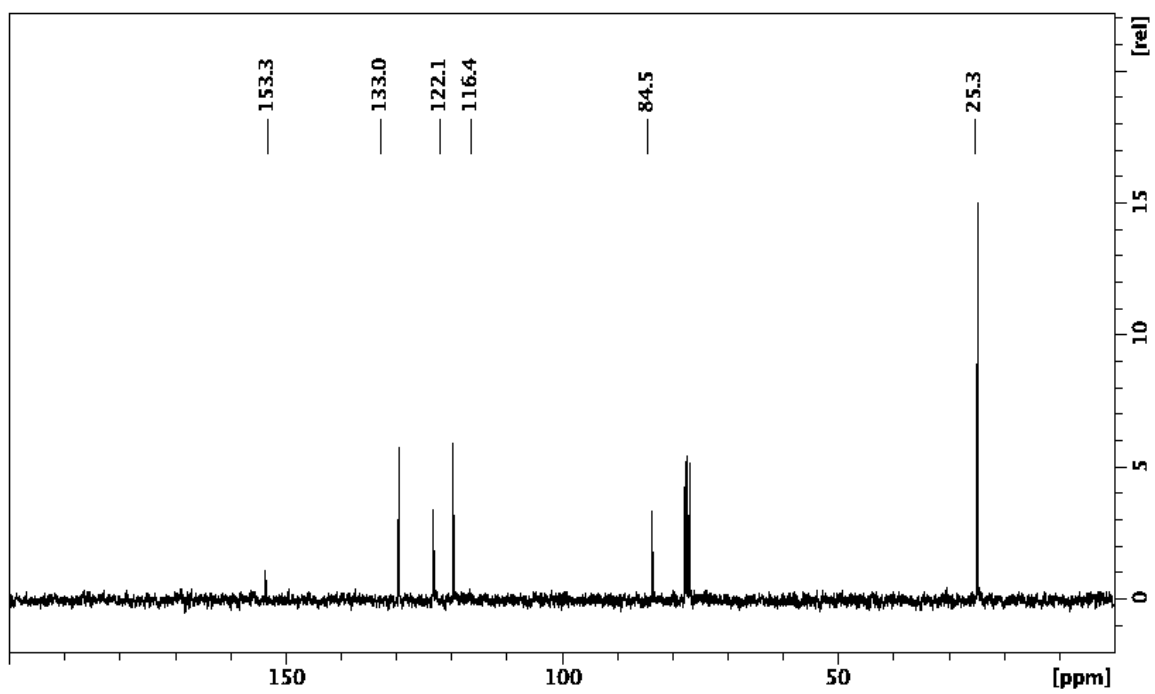

2b

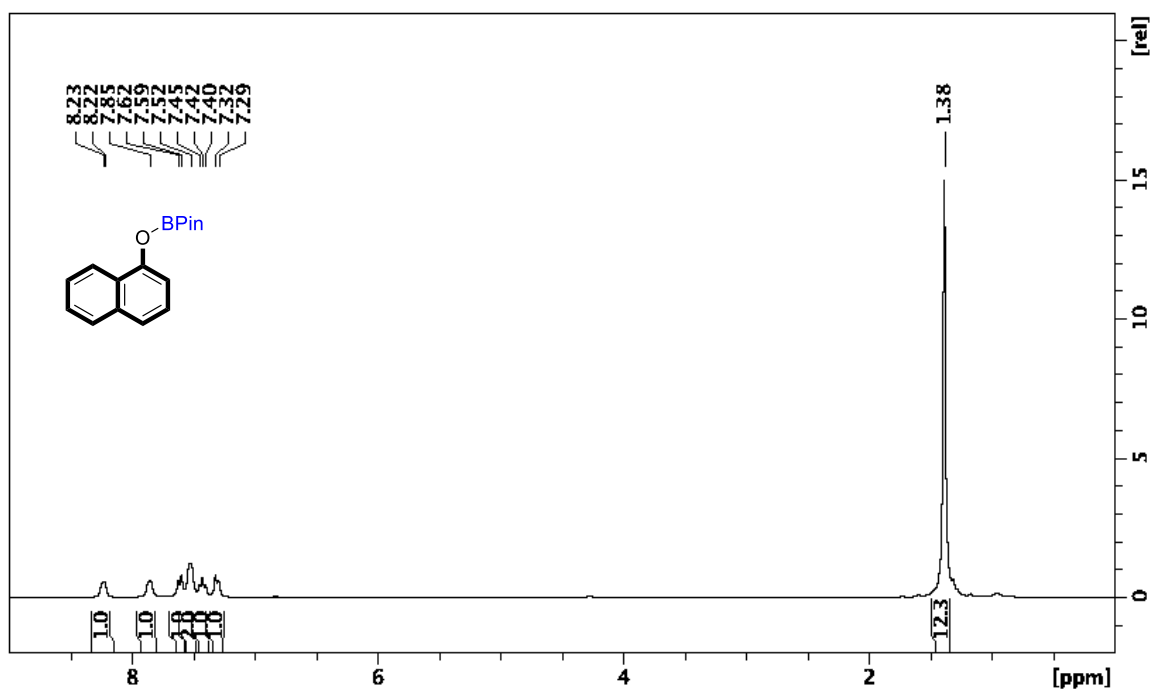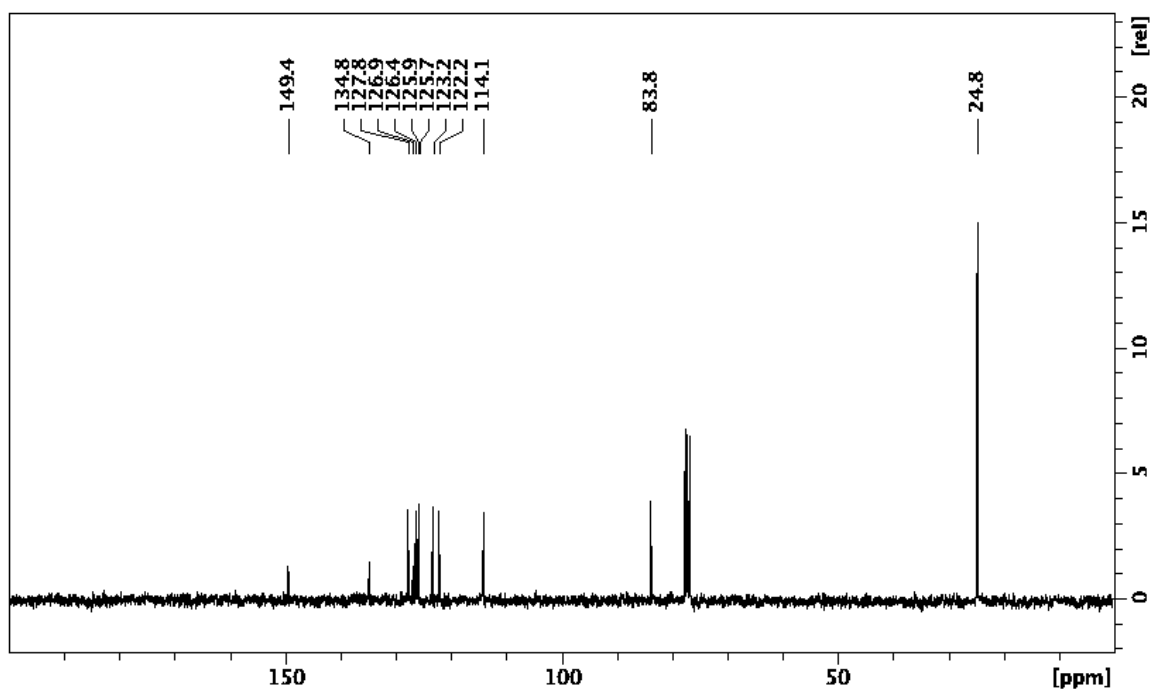

2c

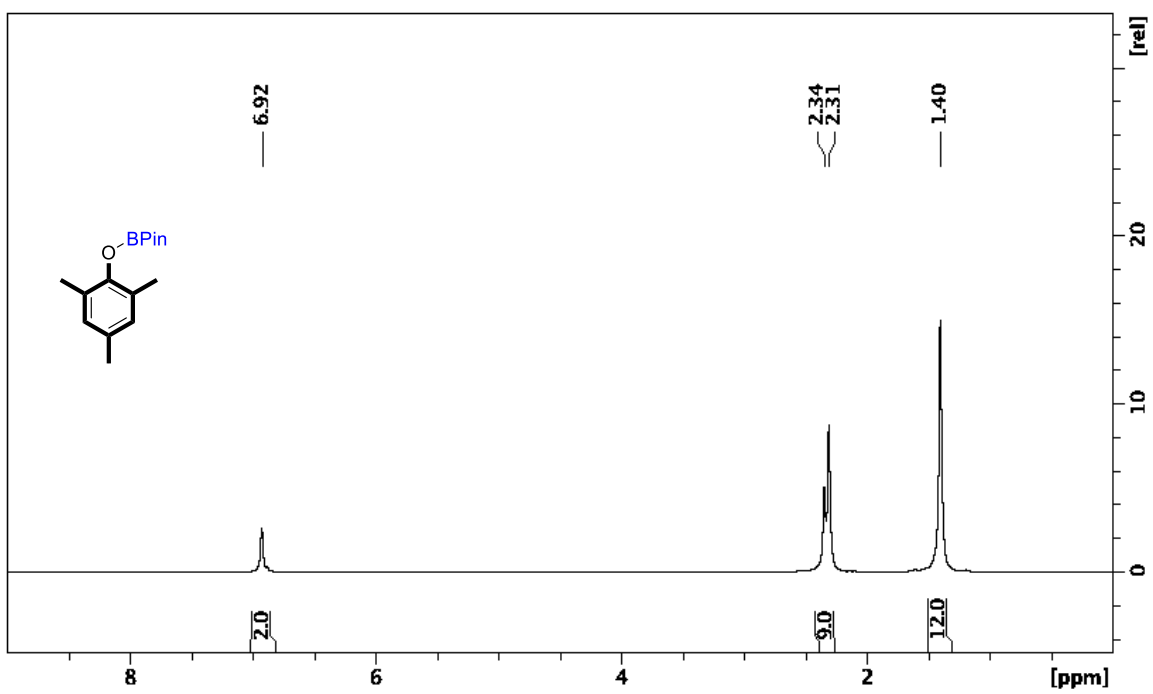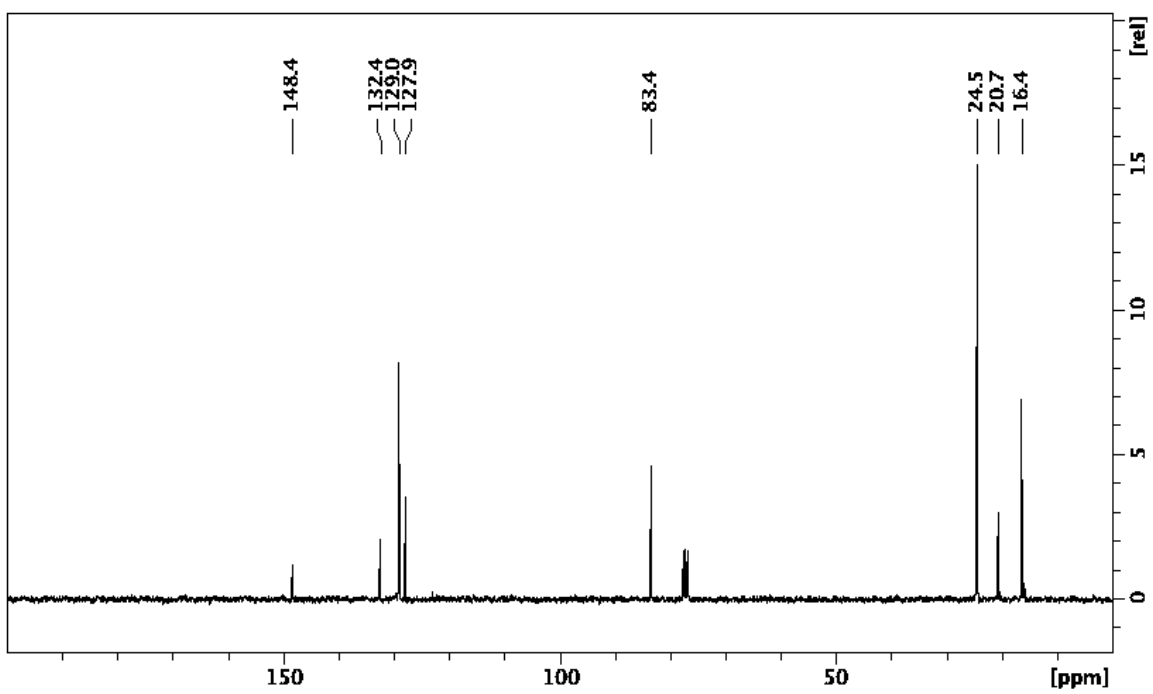

2d

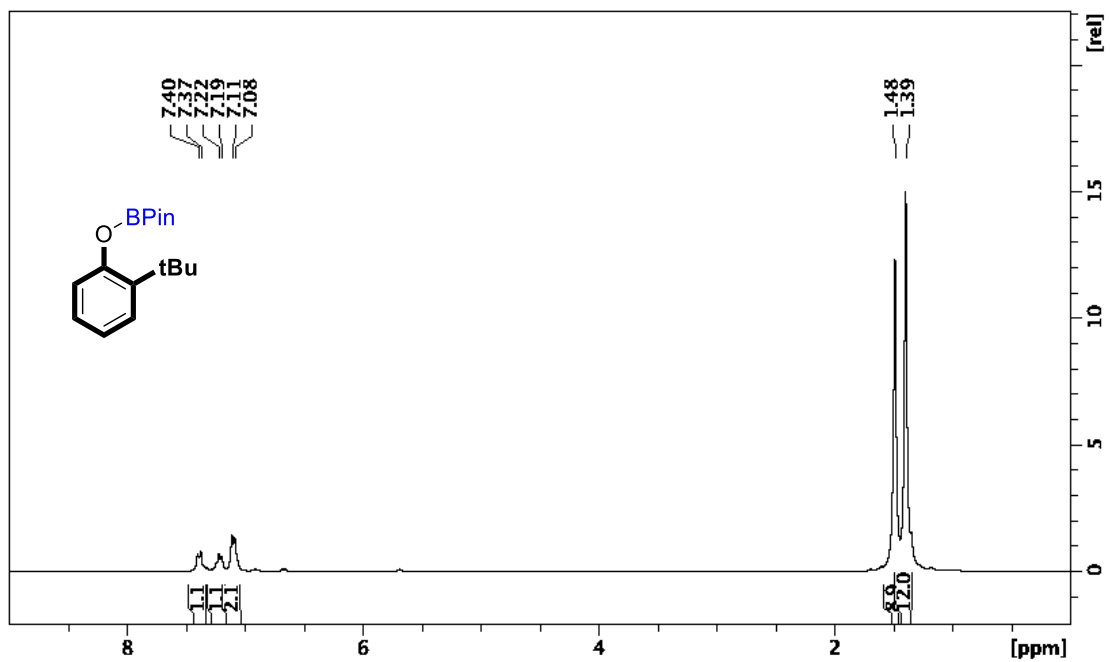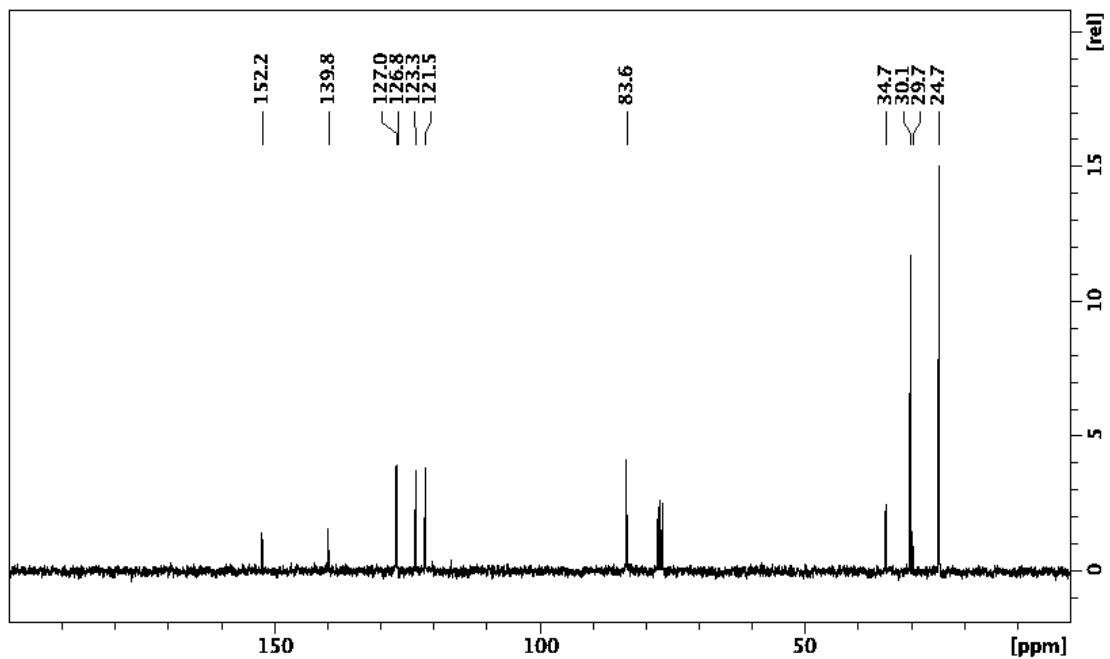



2e

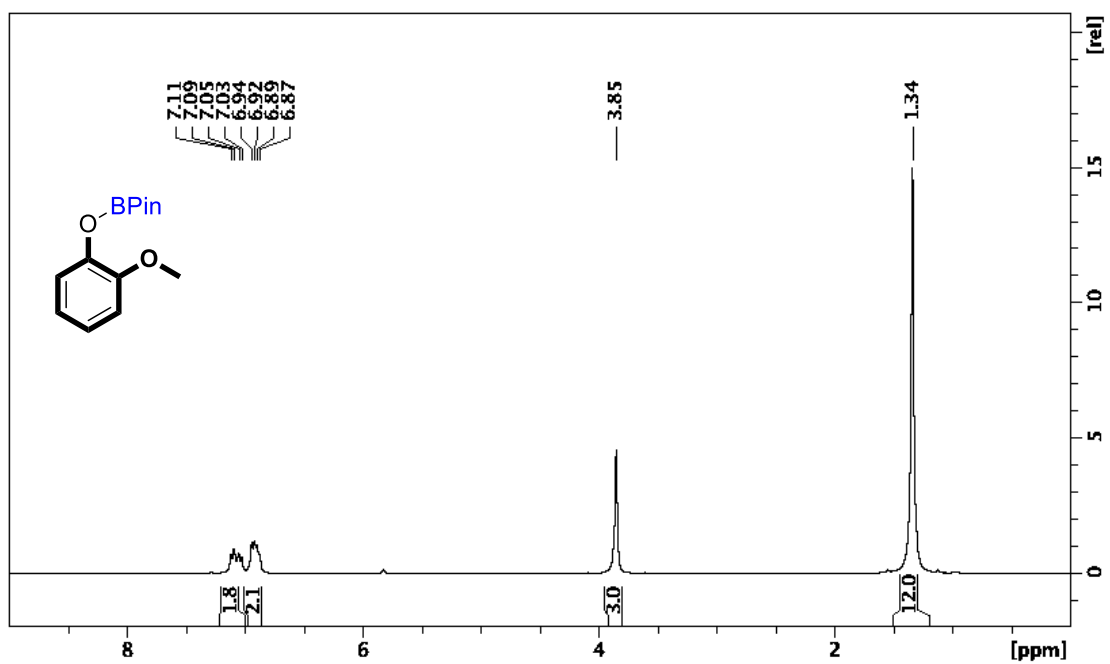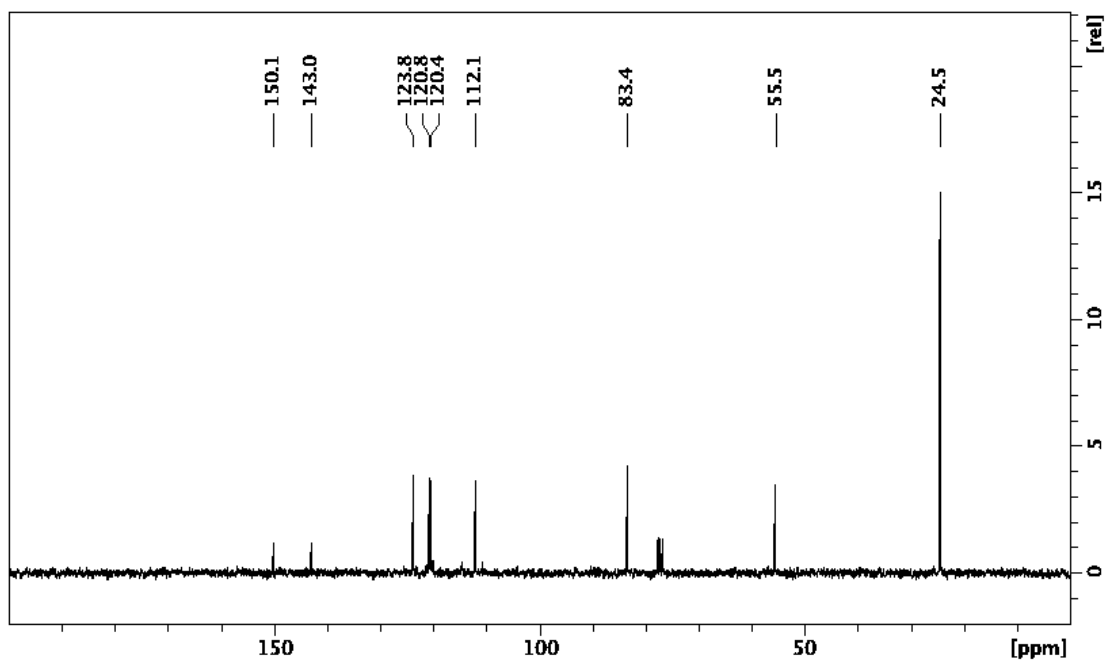

2f

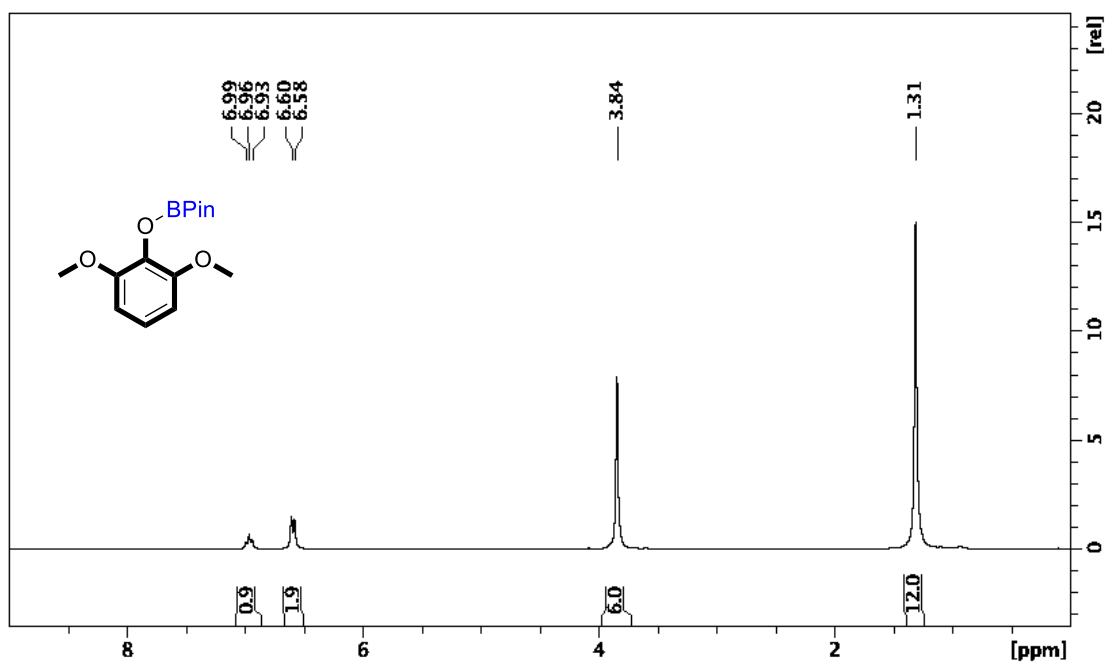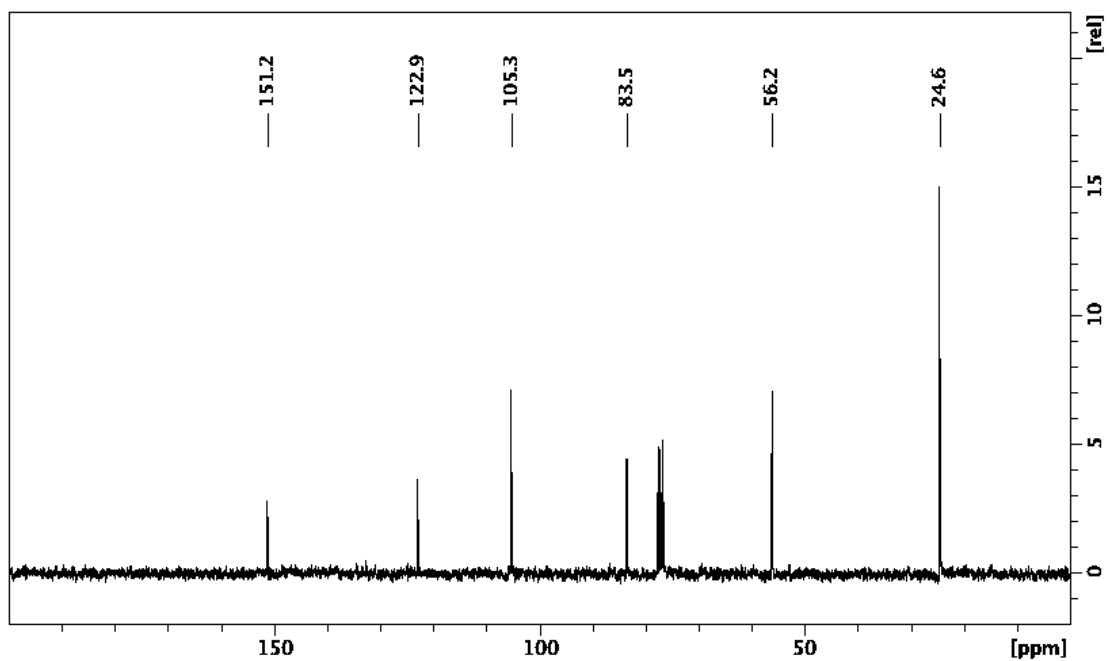

2g

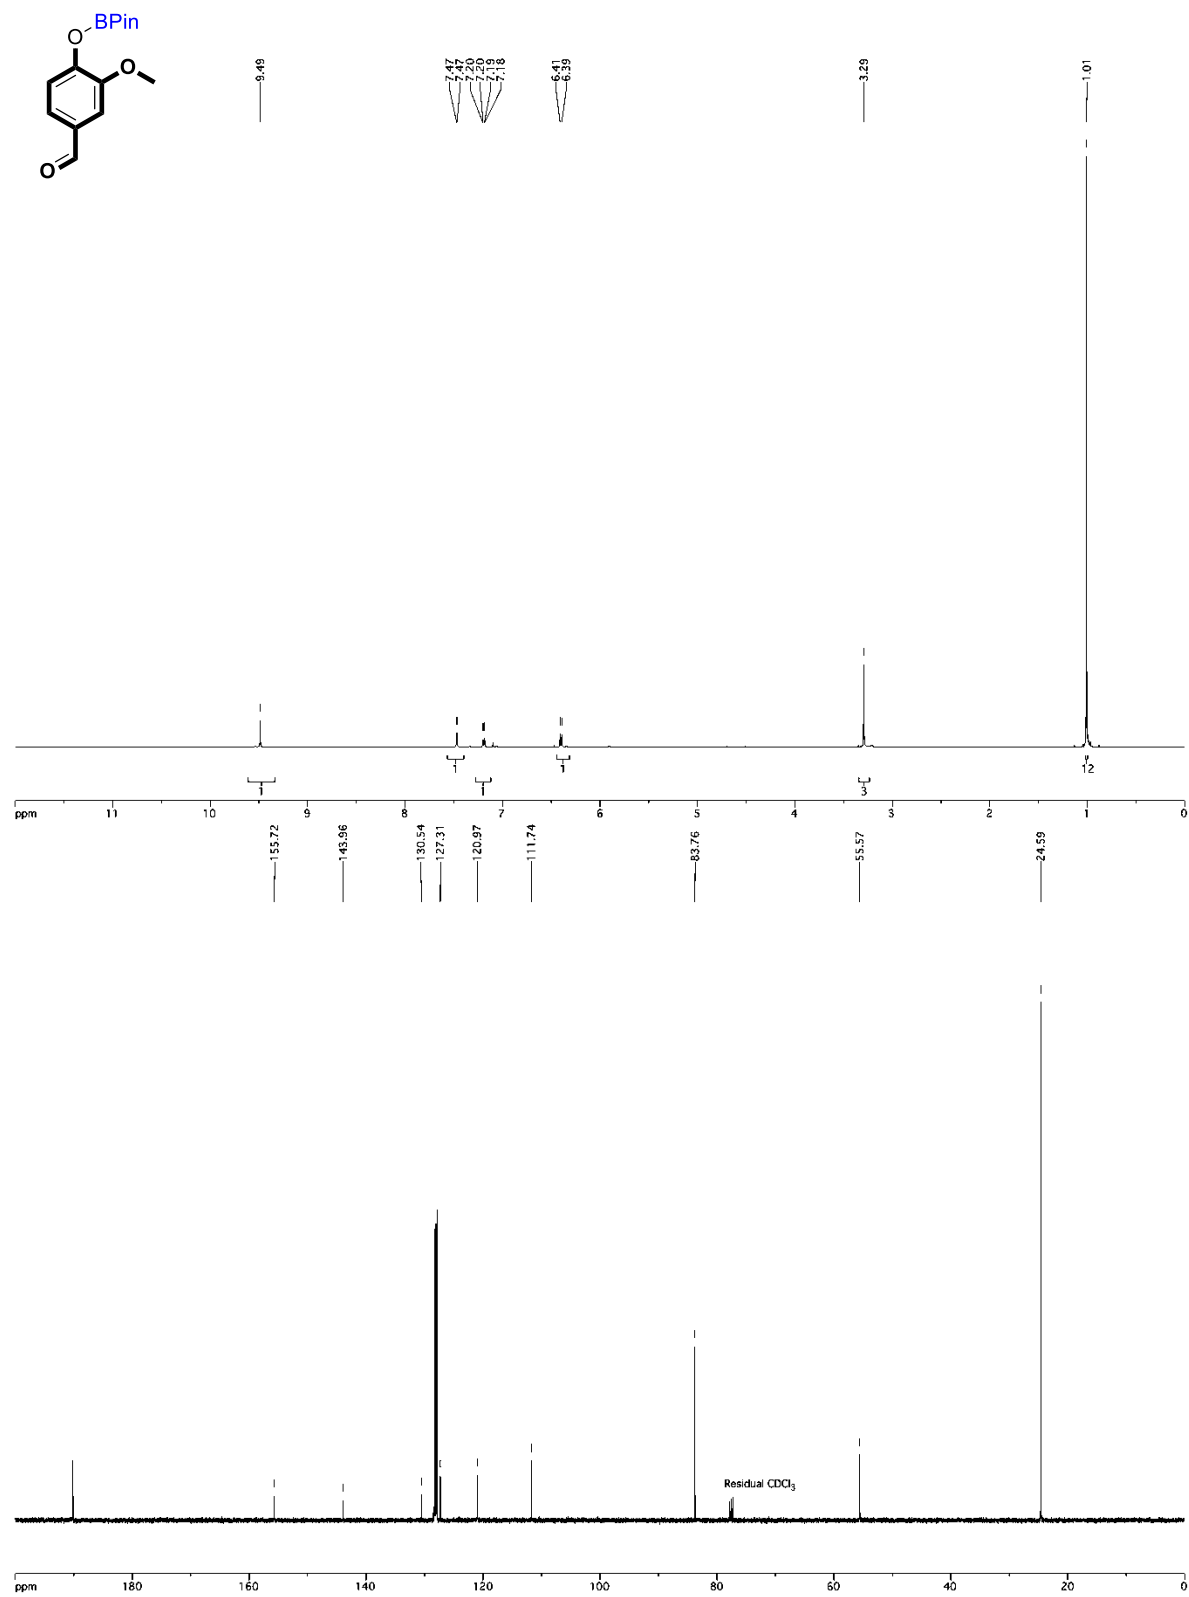

2h

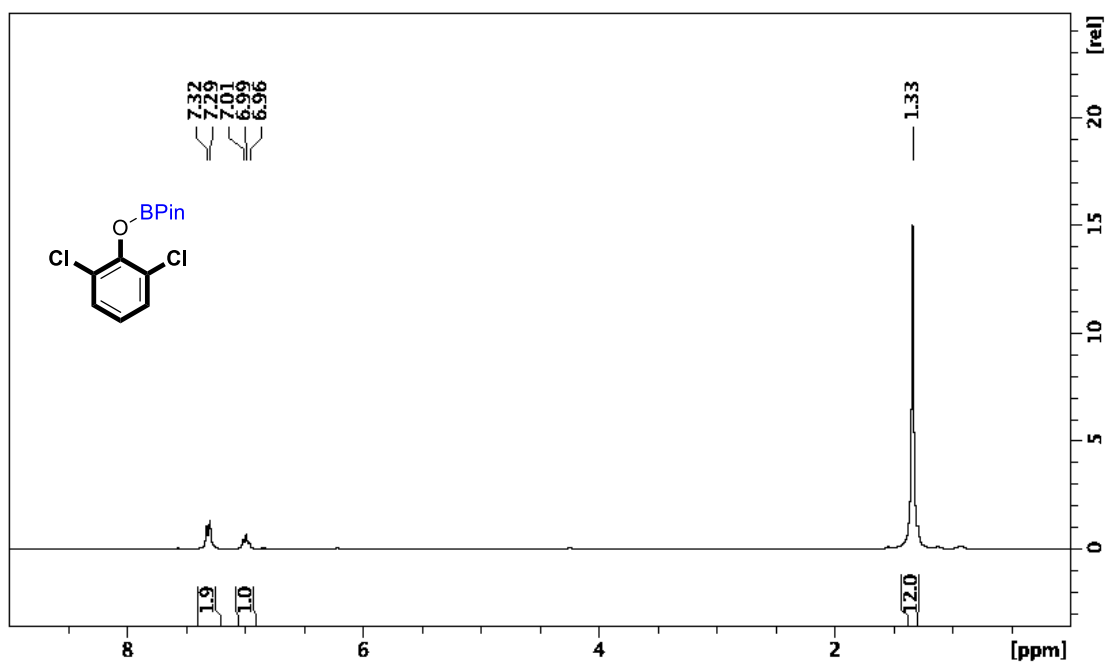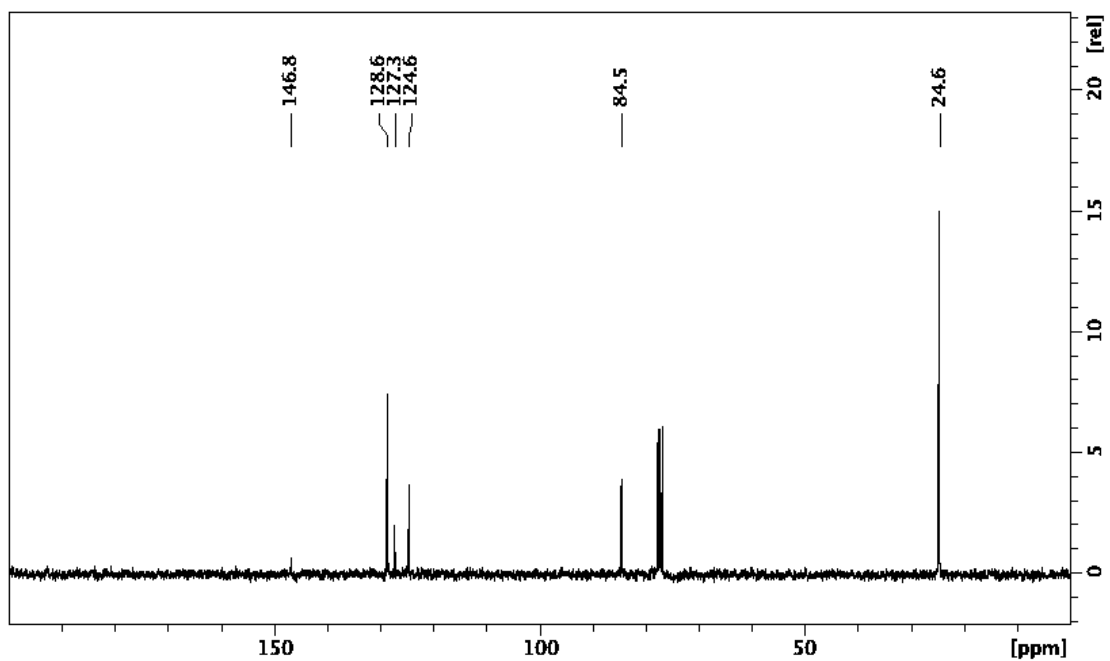

2i

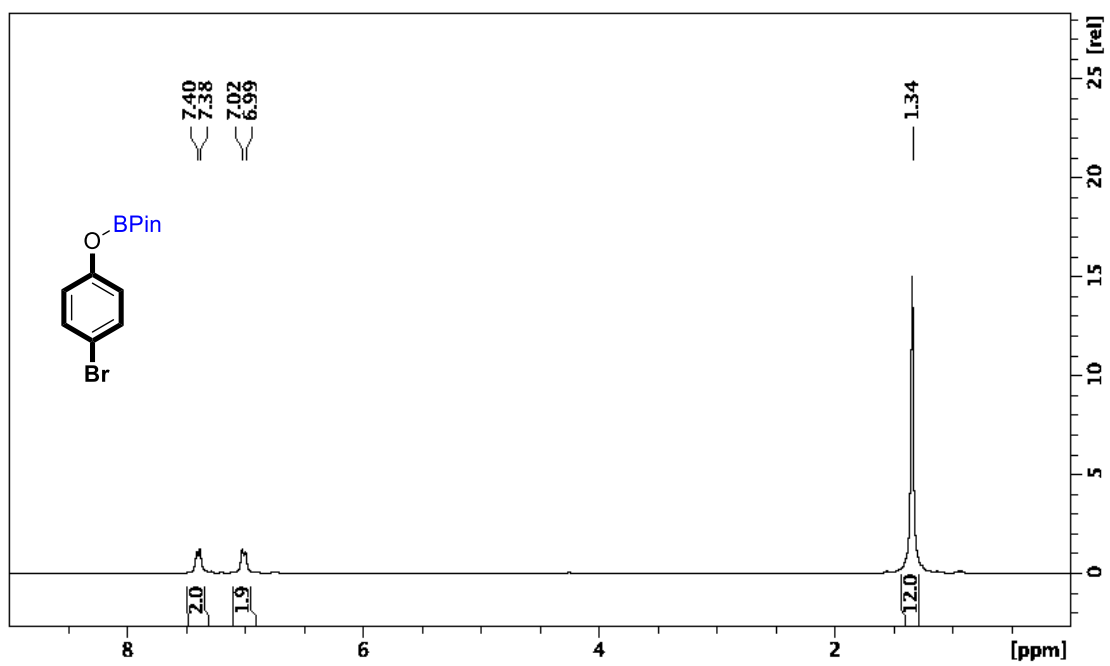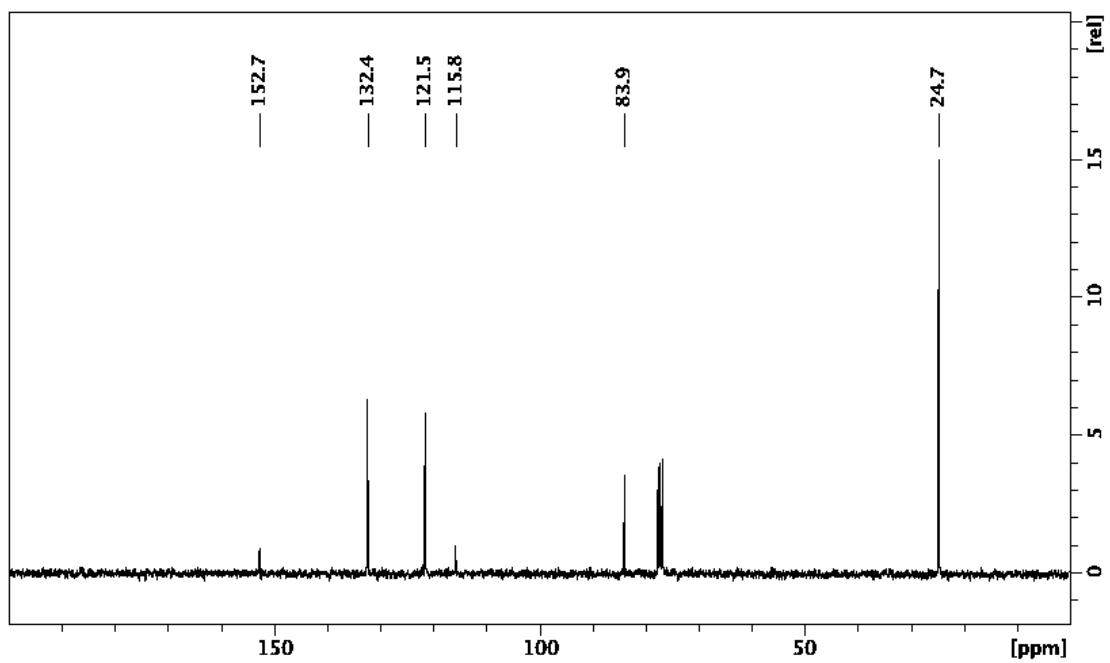

2j

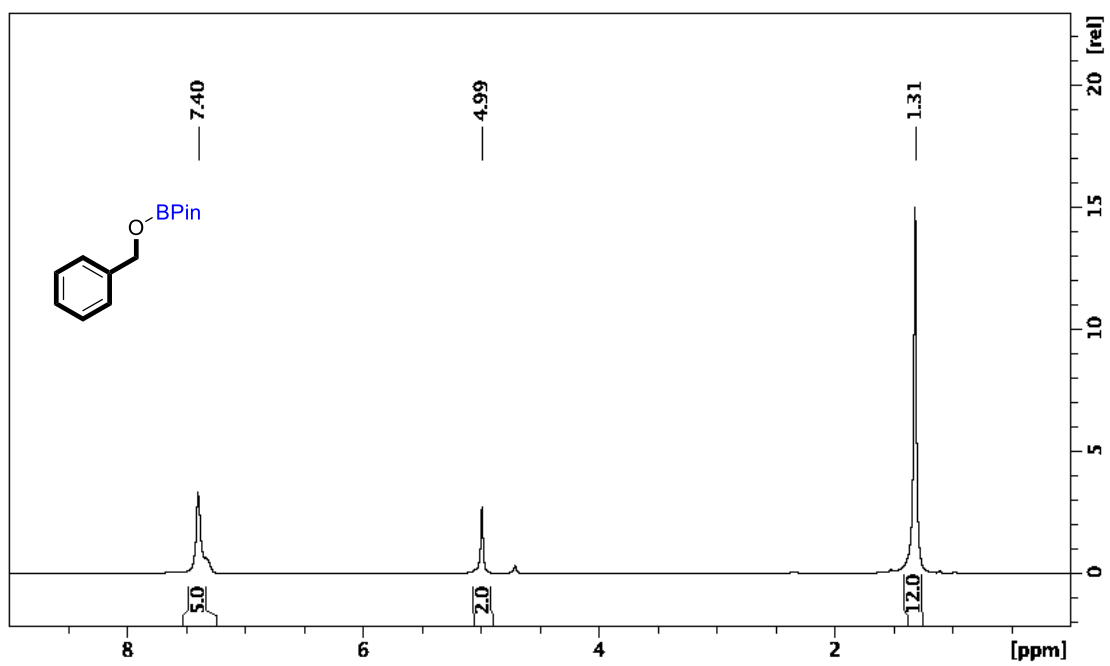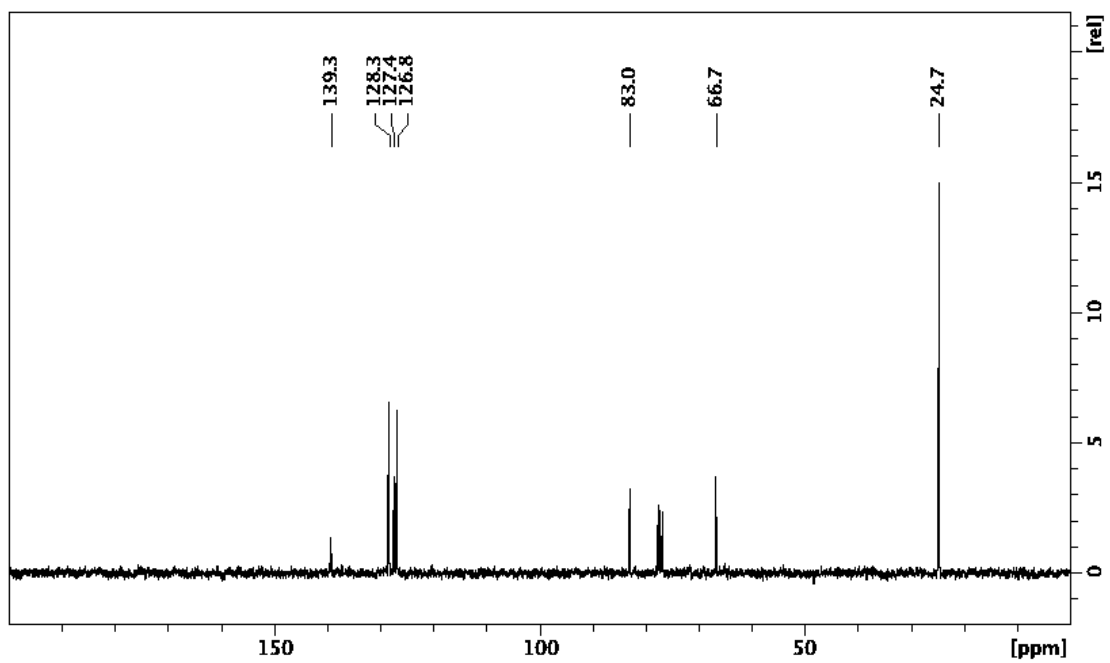

2k

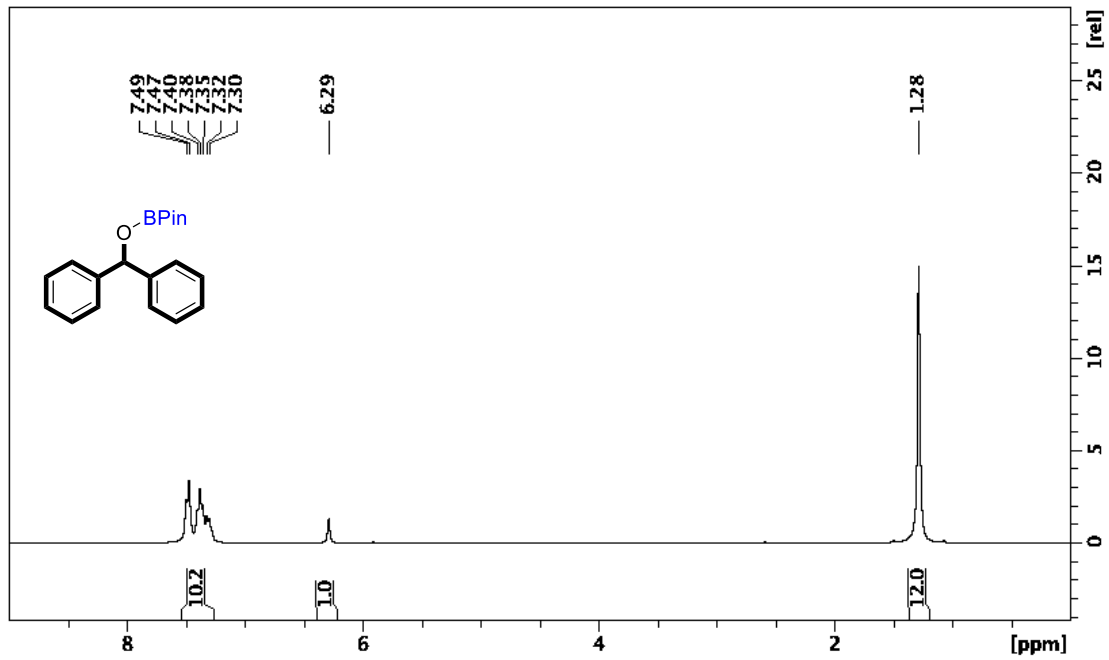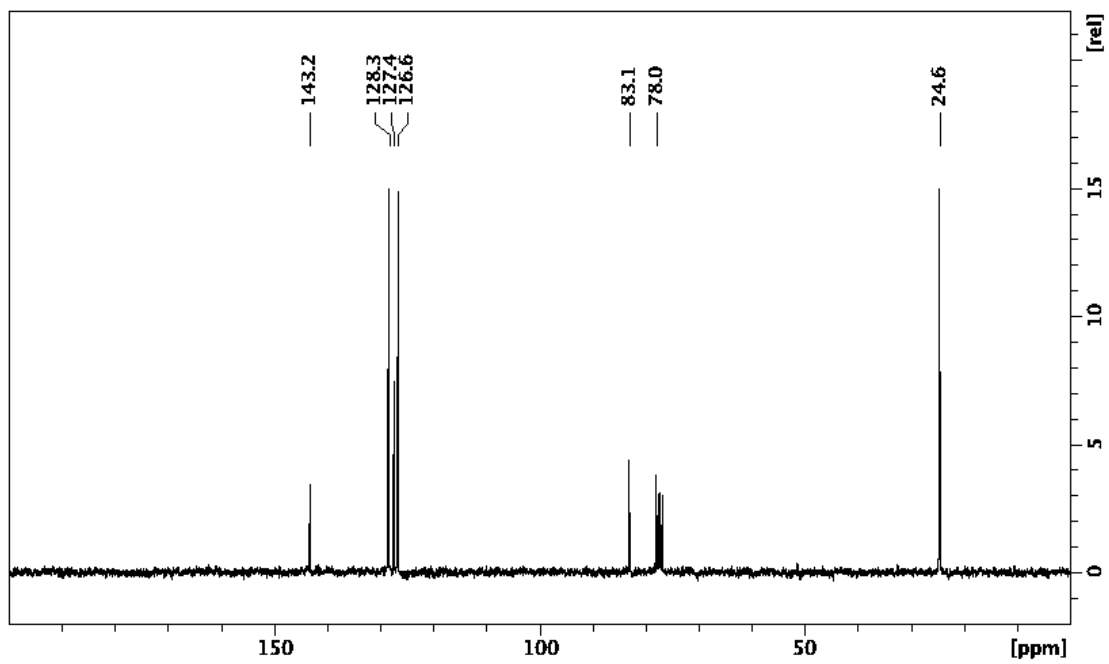

21

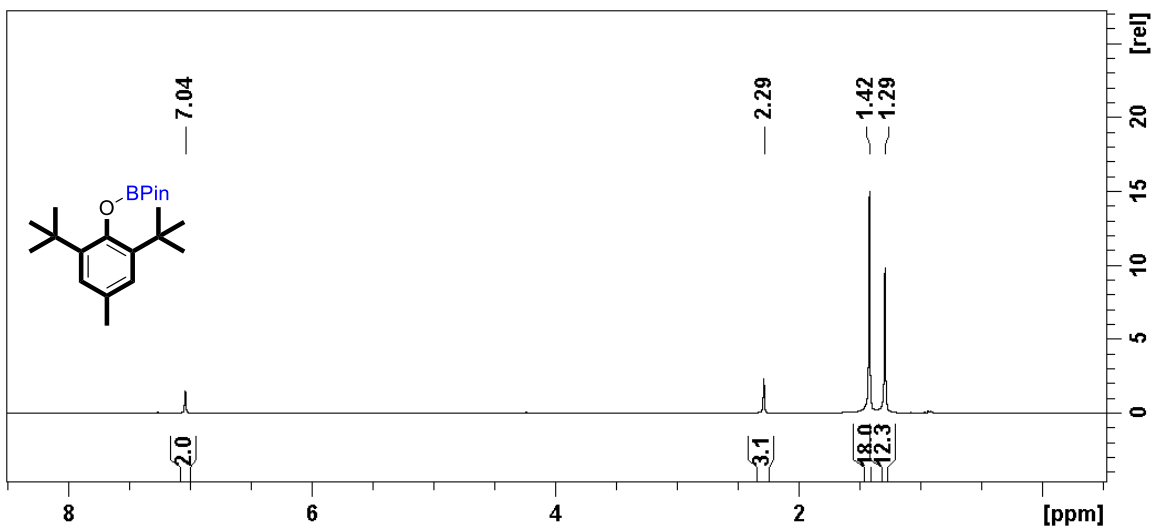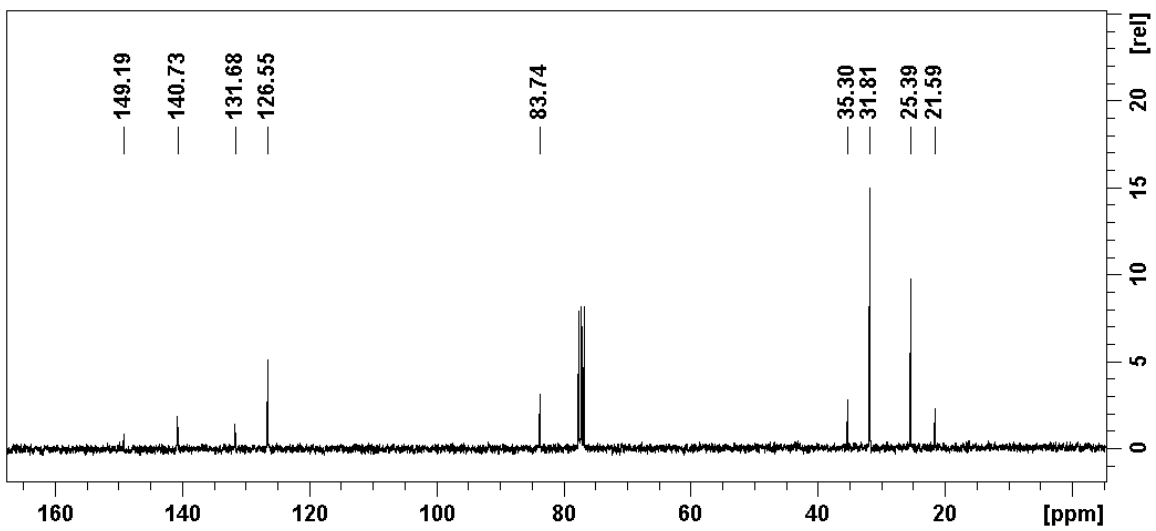



2m

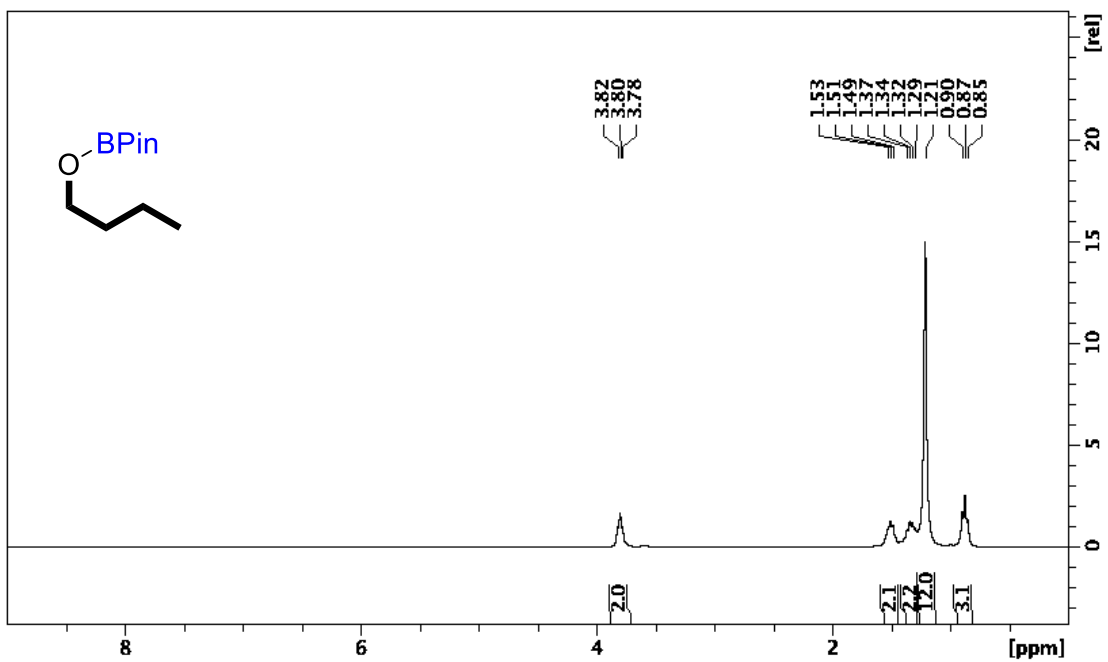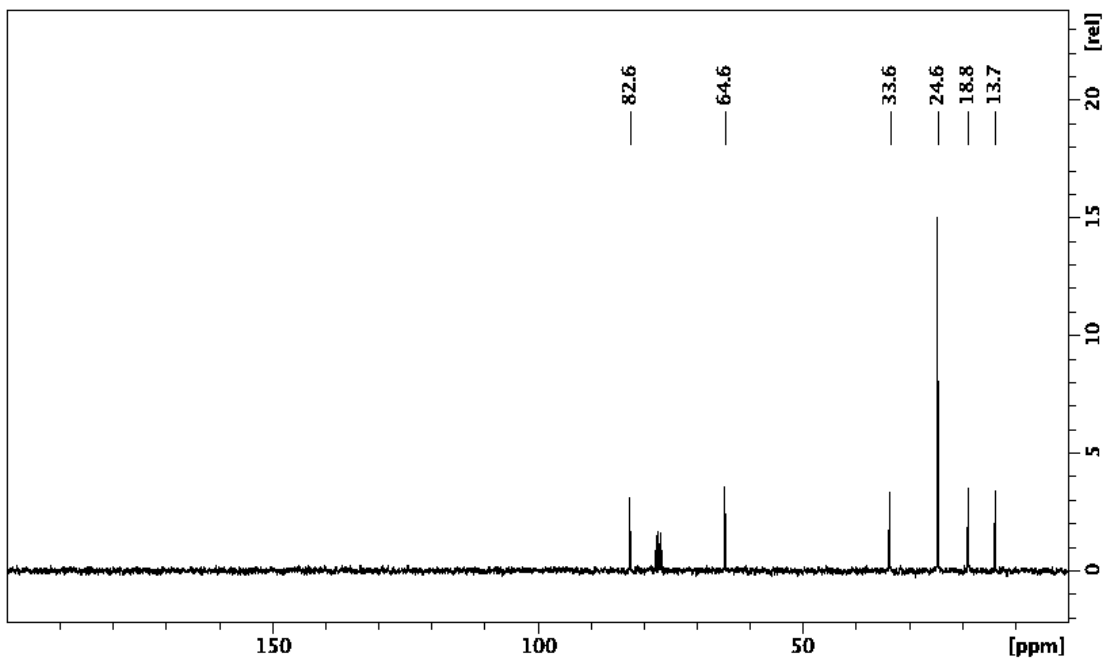

2n

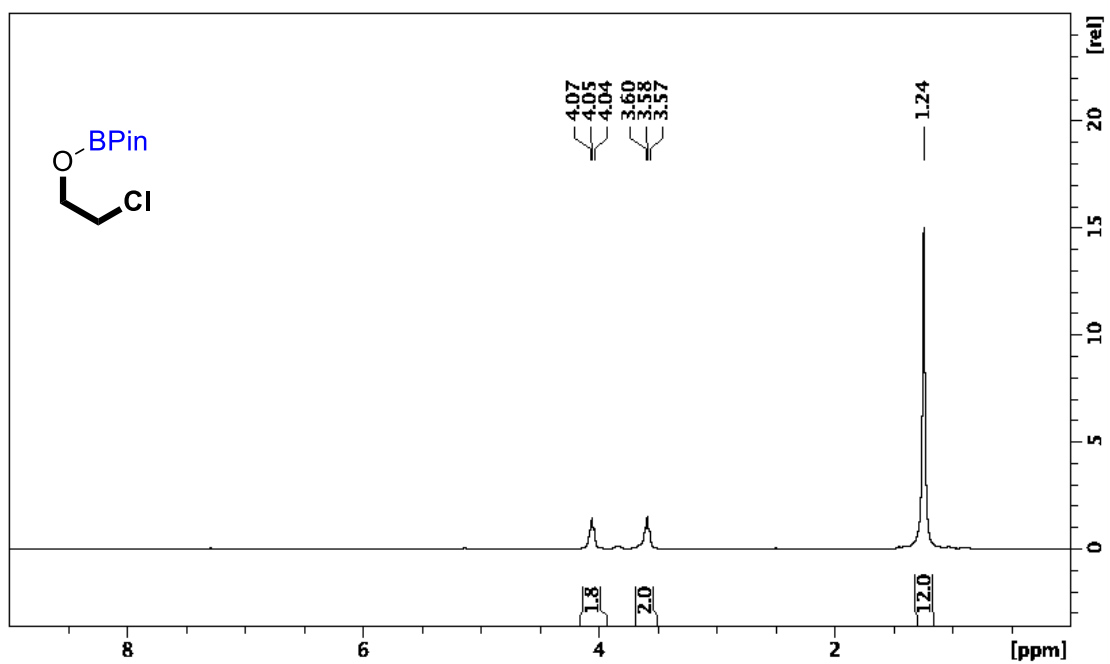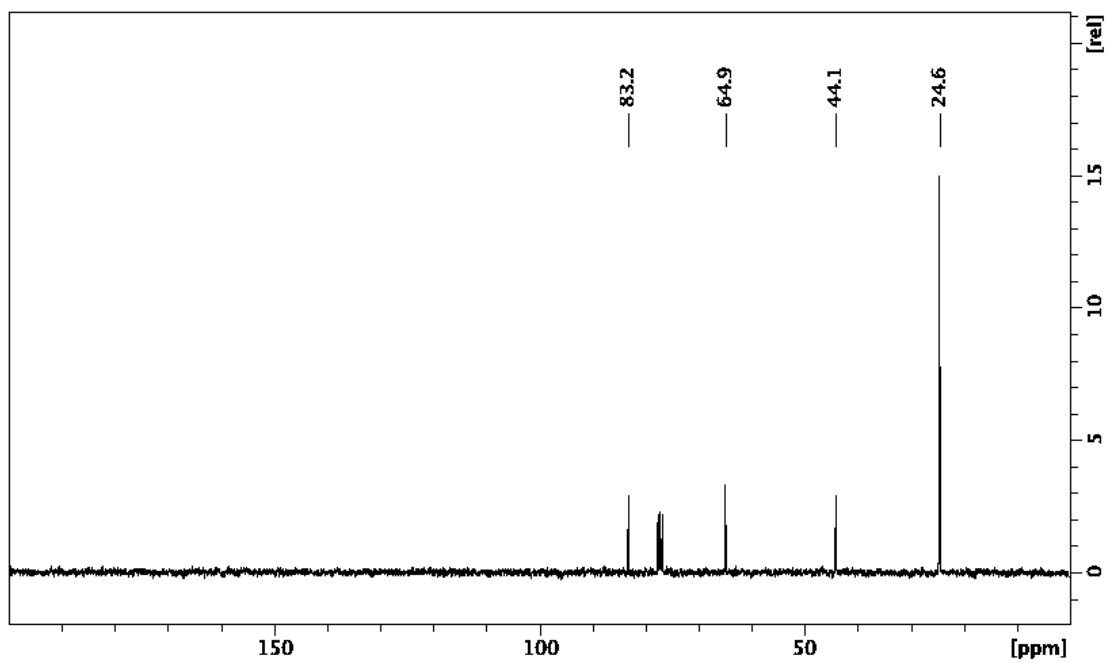

20

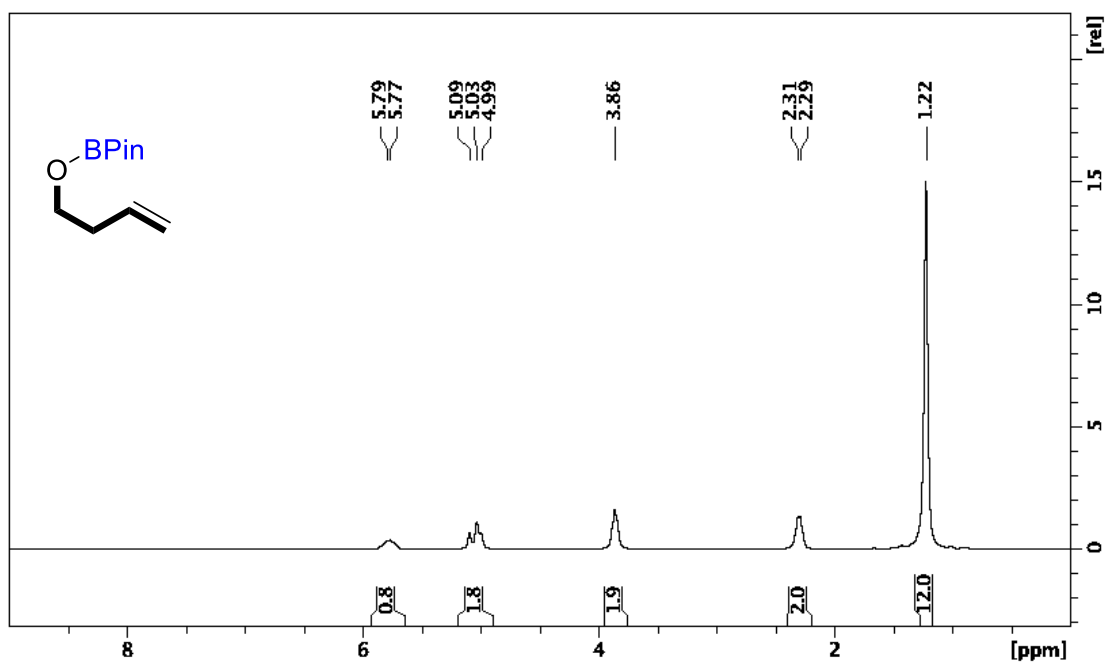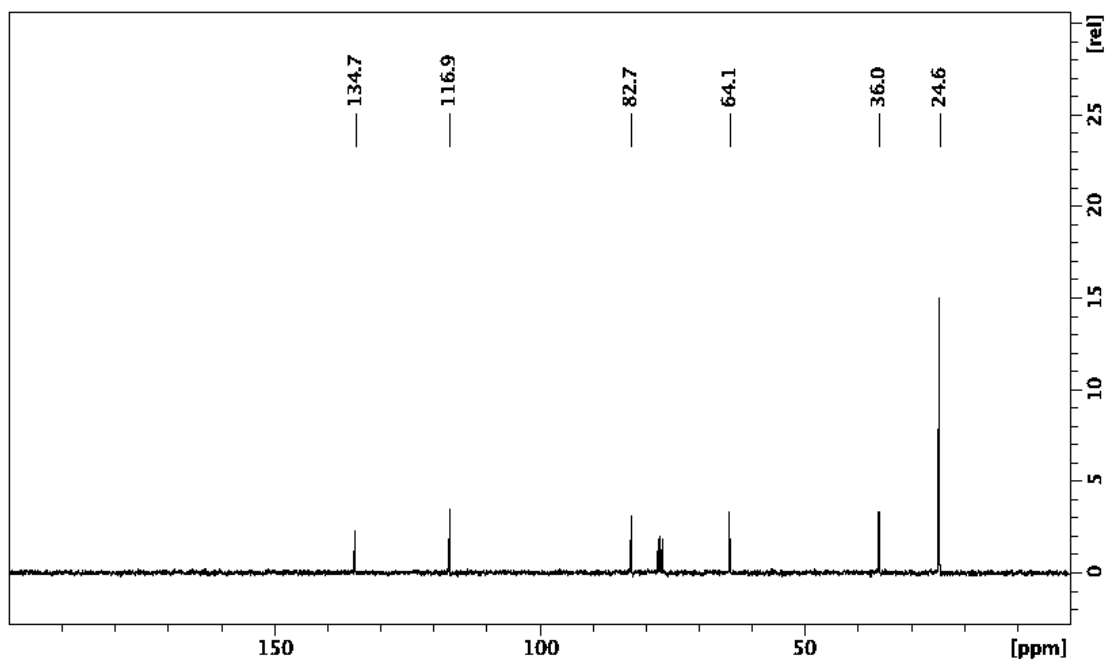

2p

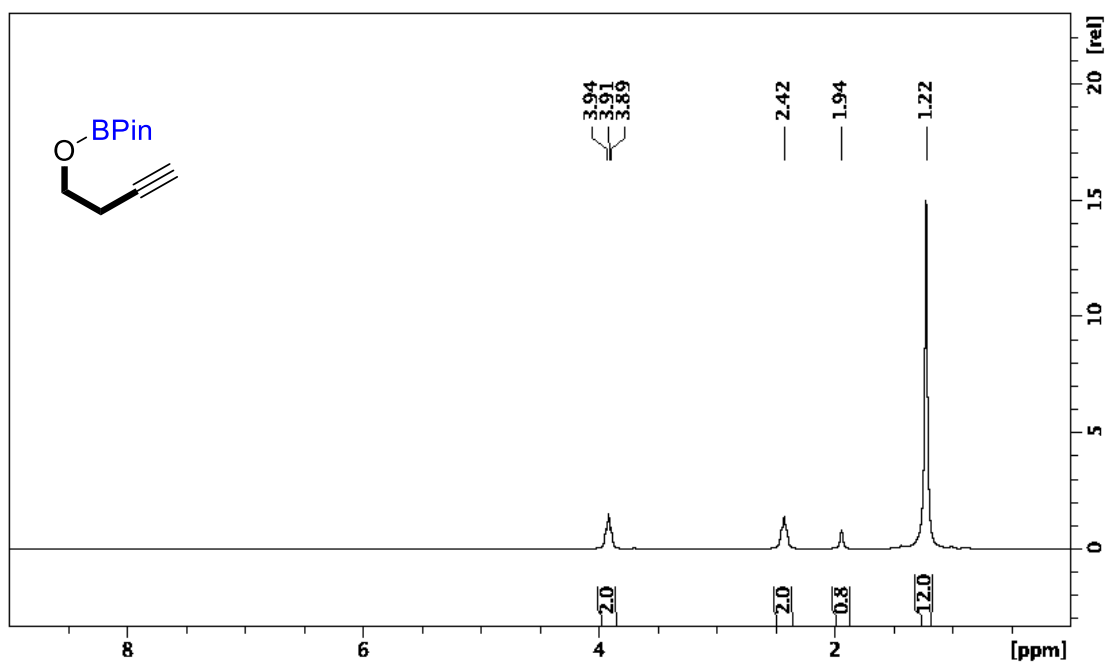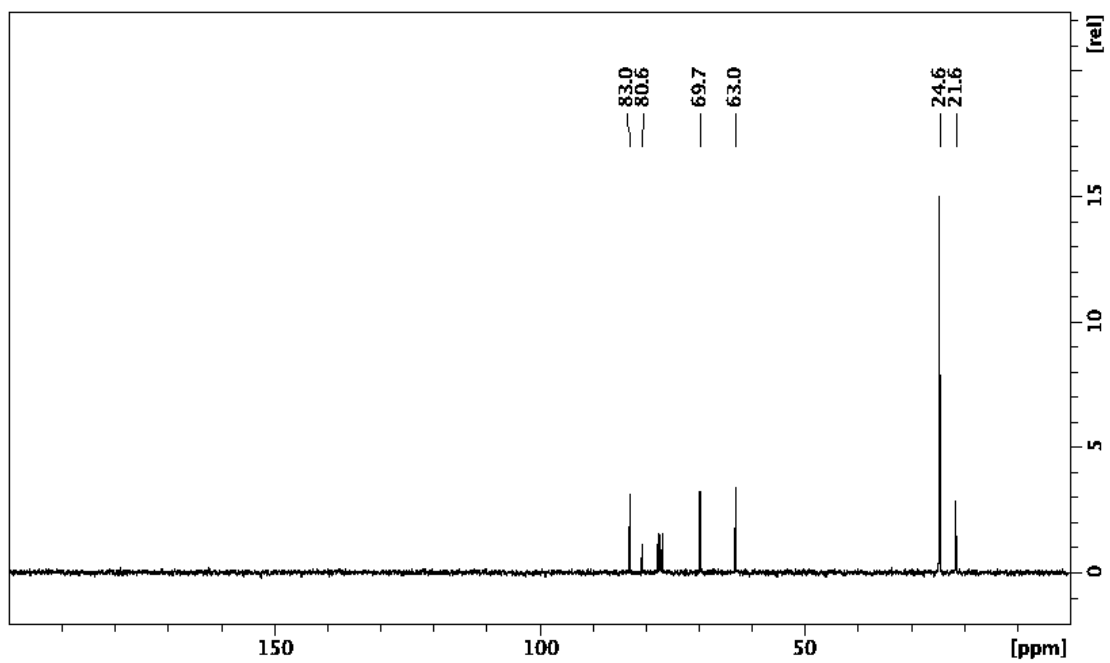

2q

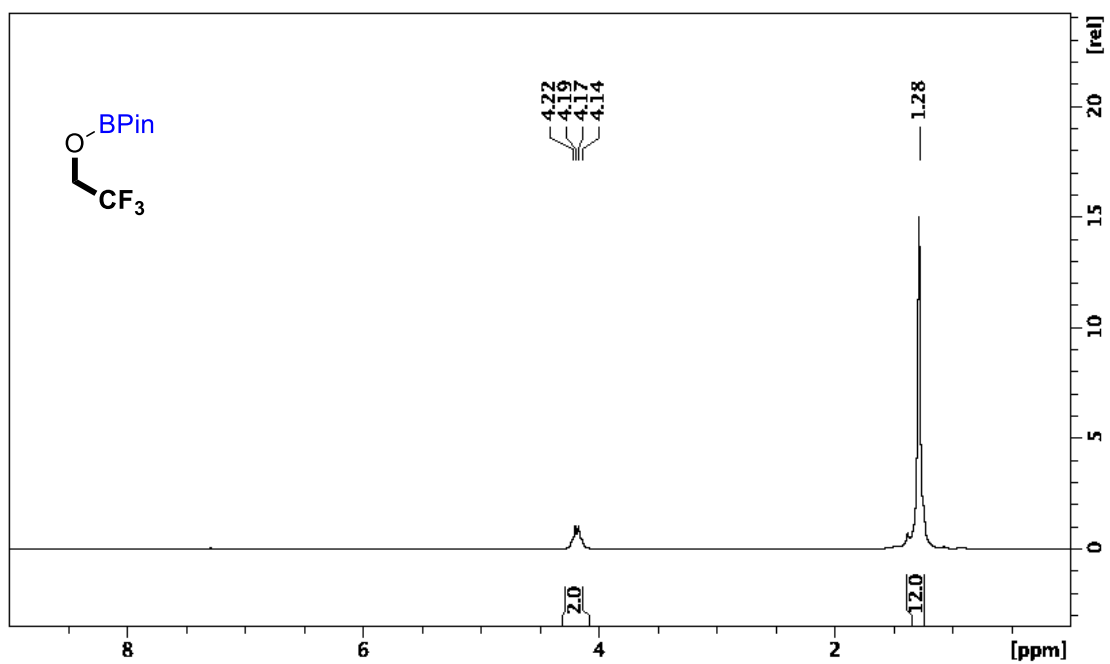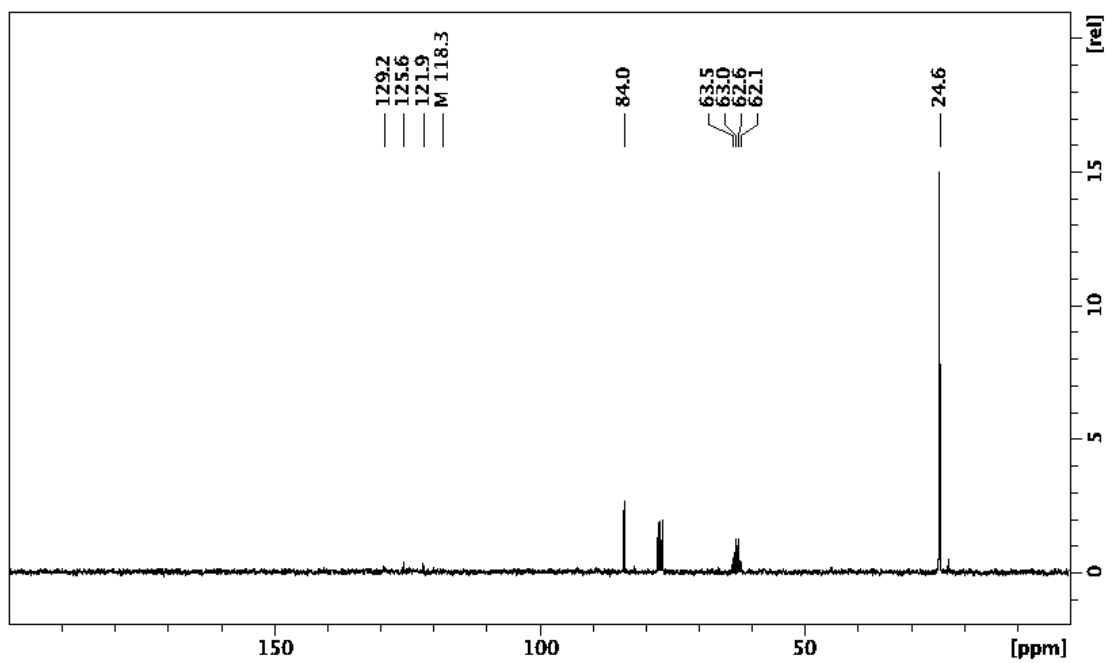

2r

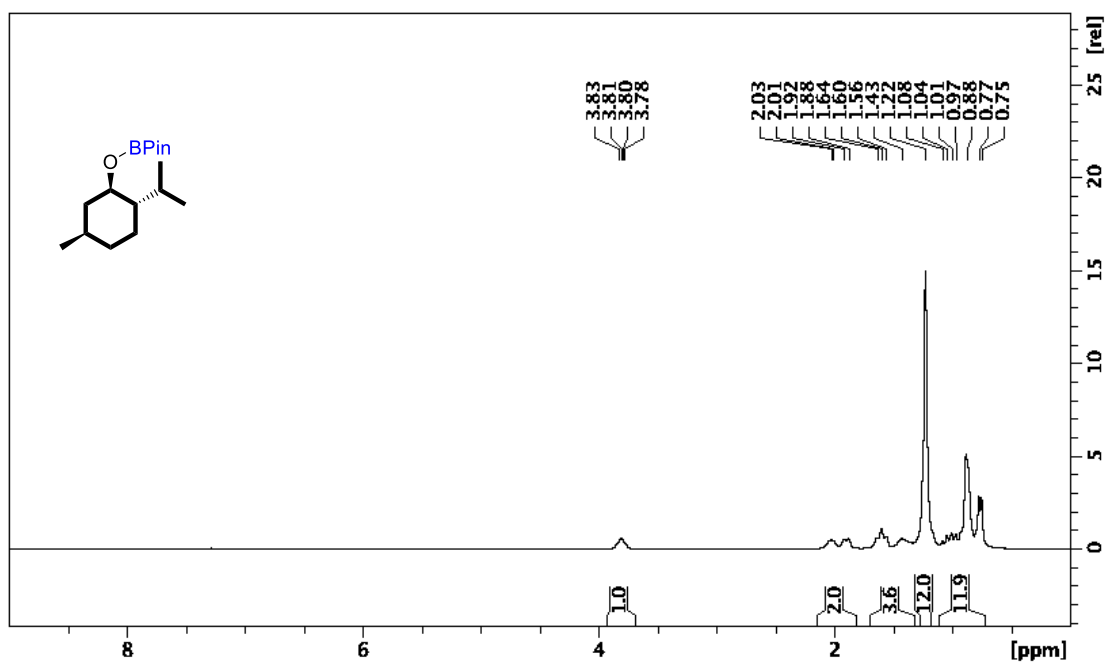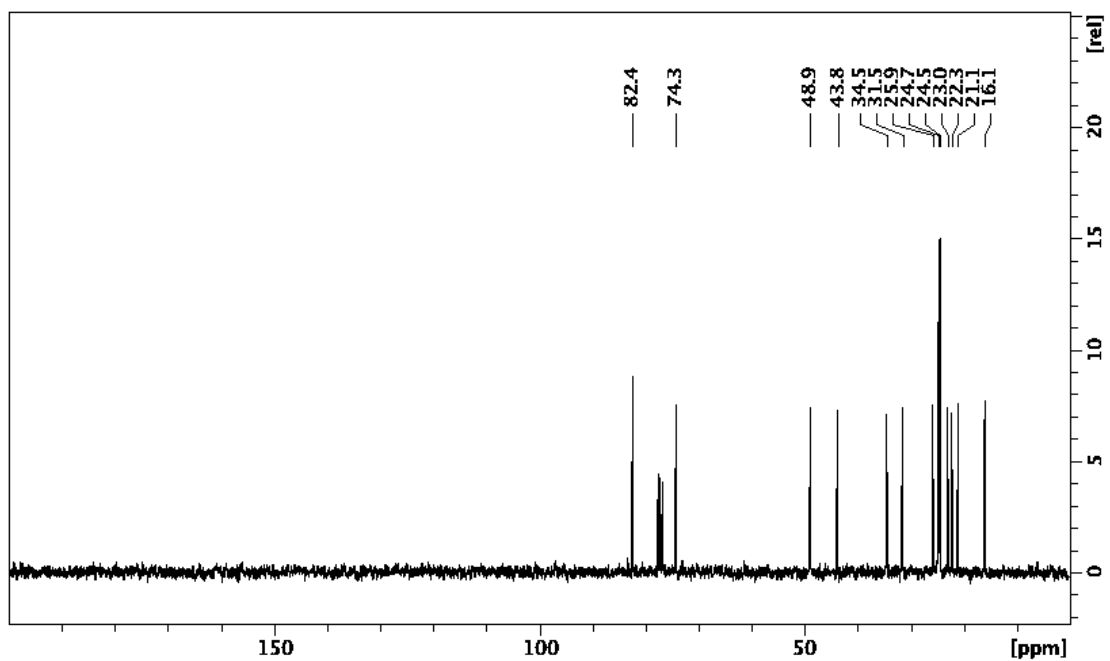

2s

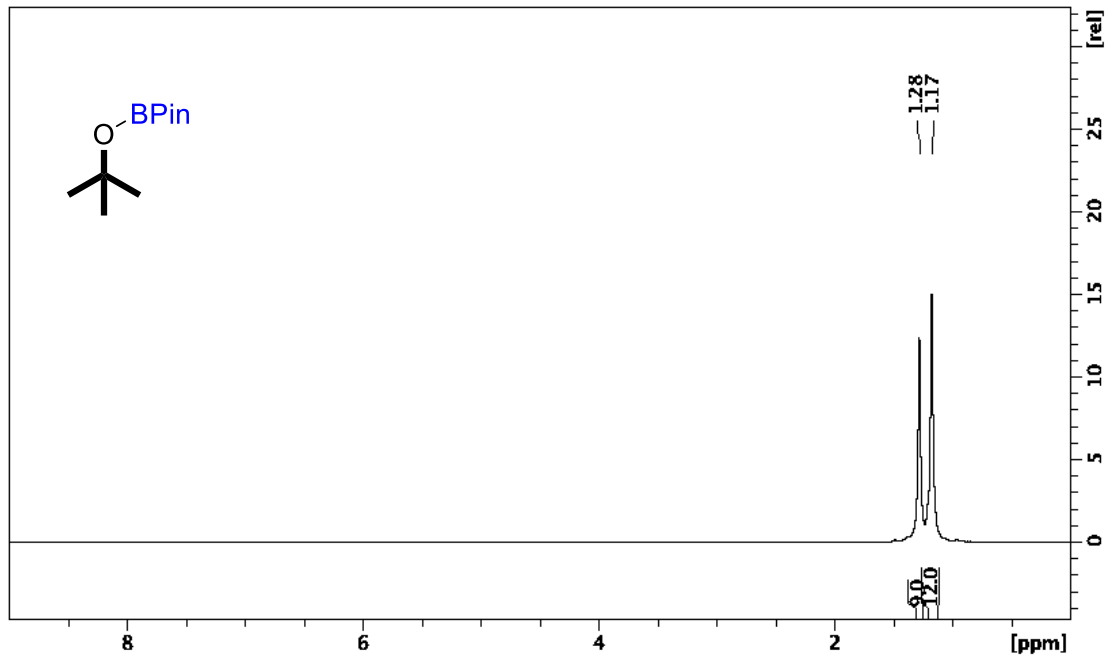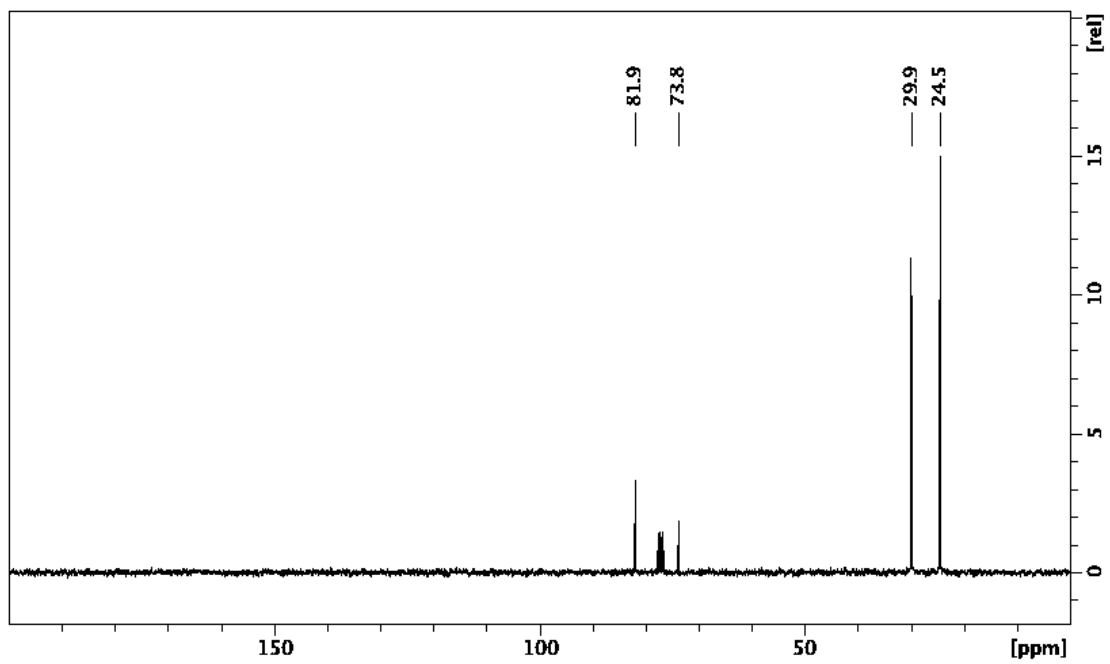

2t

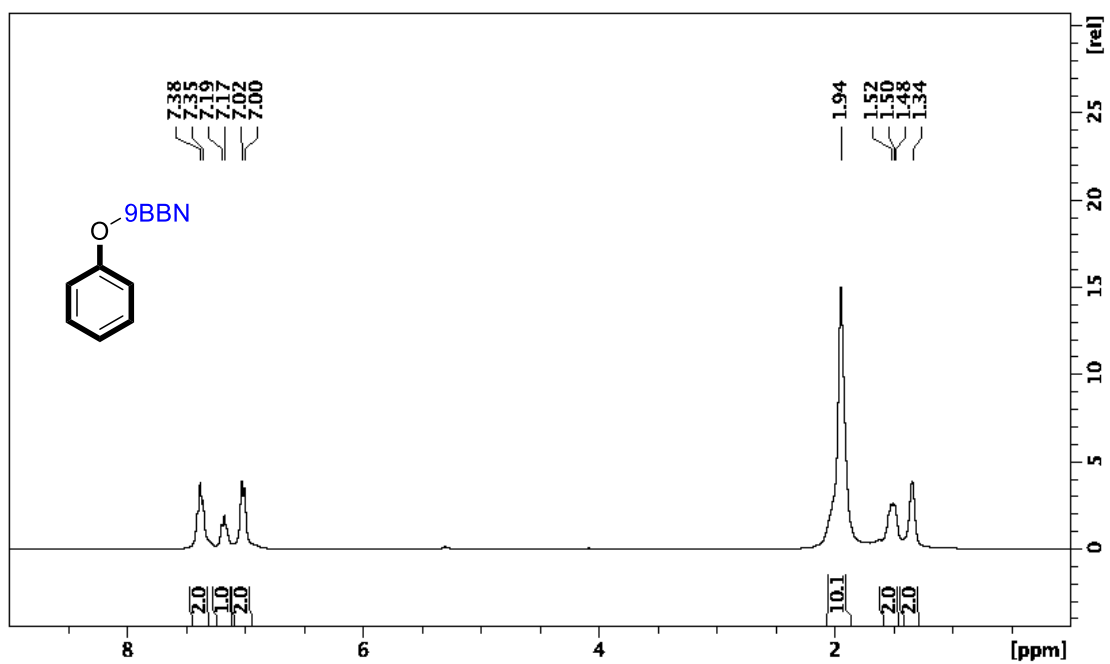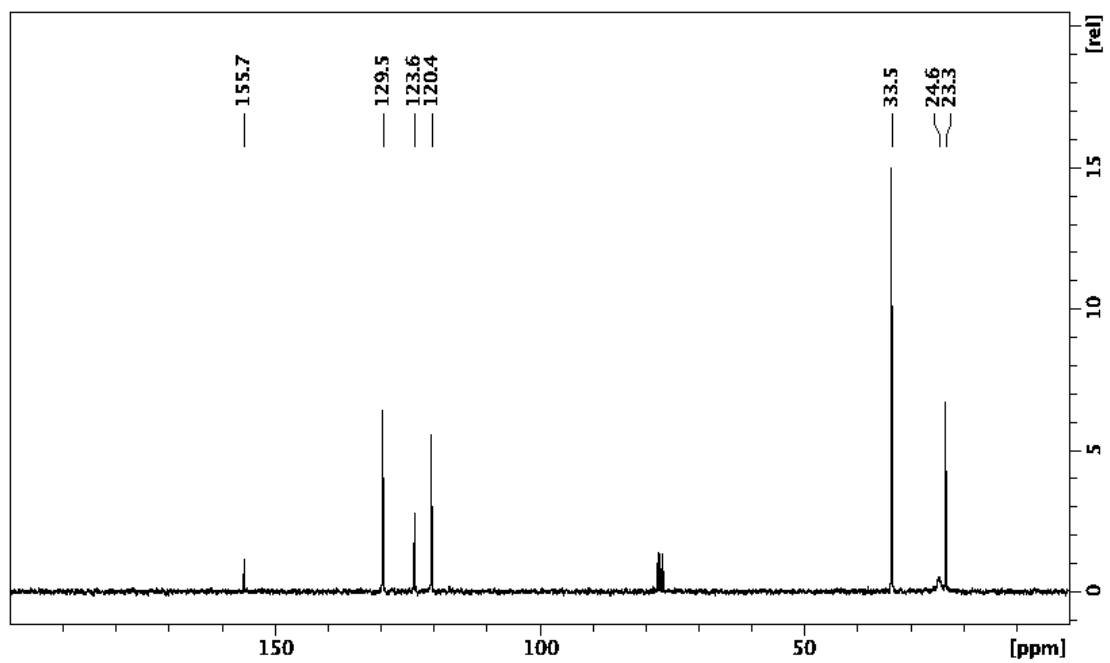



2u

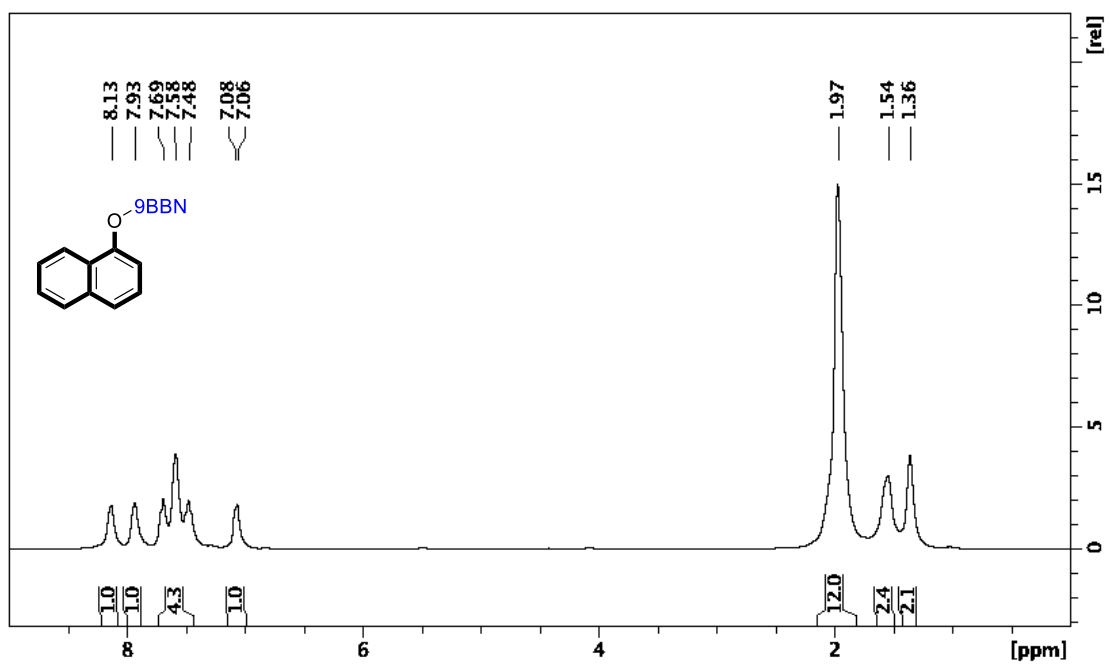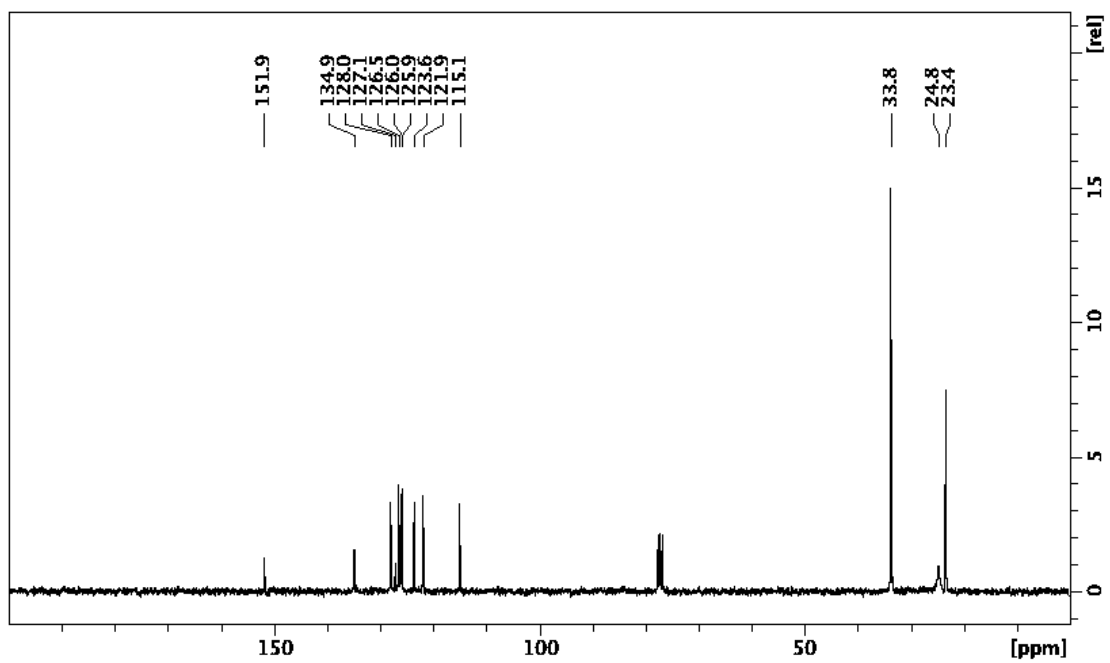

2v

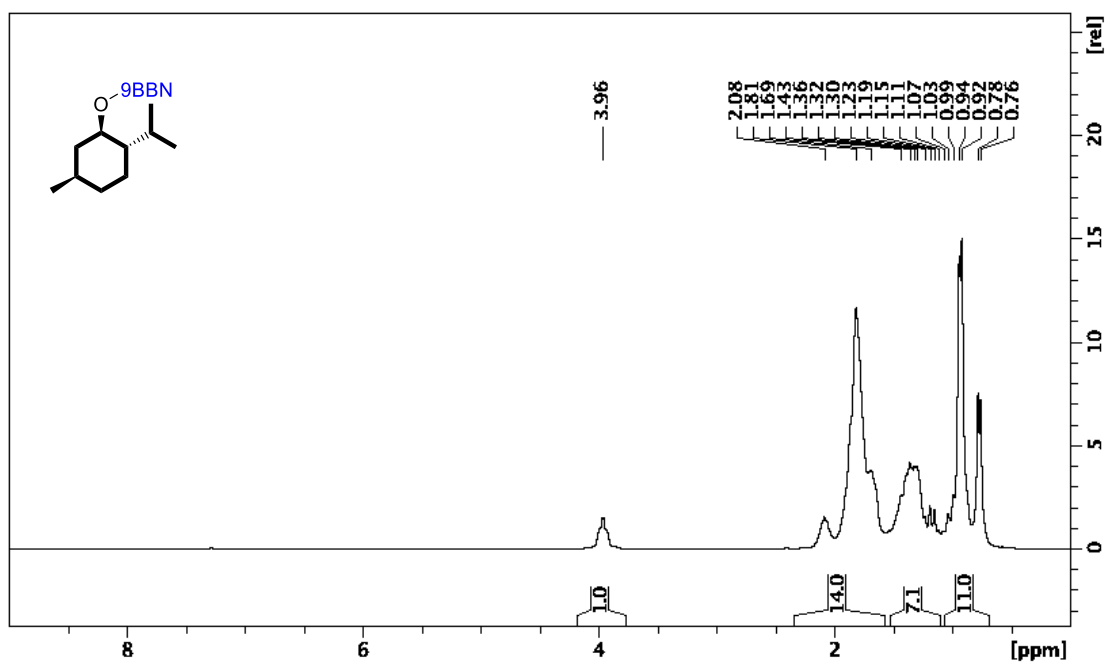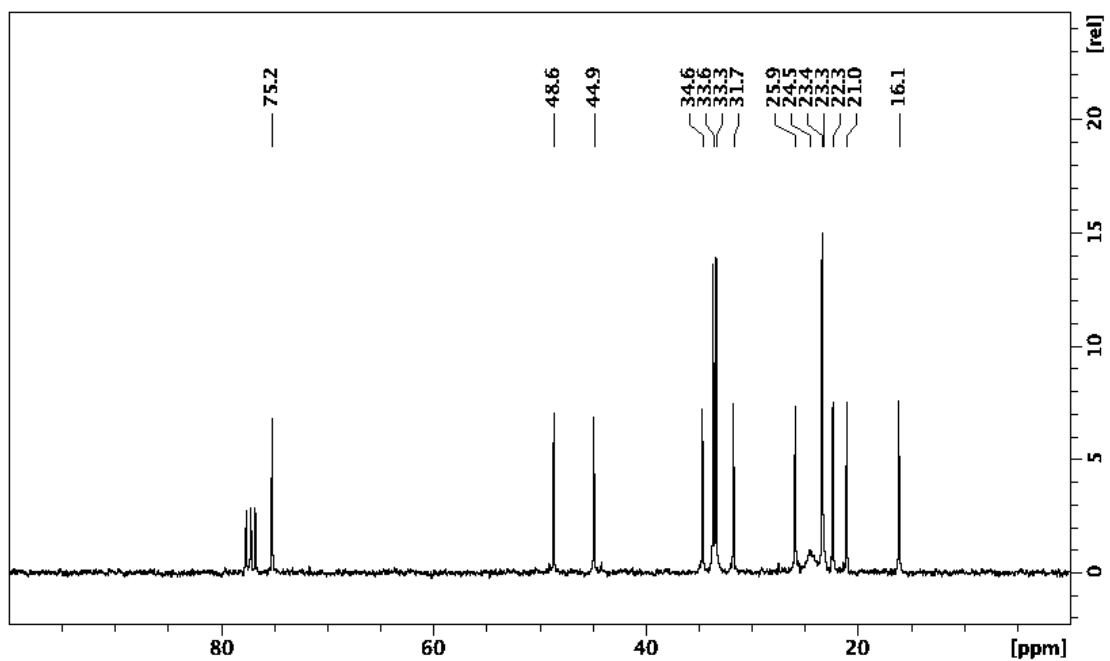

2w

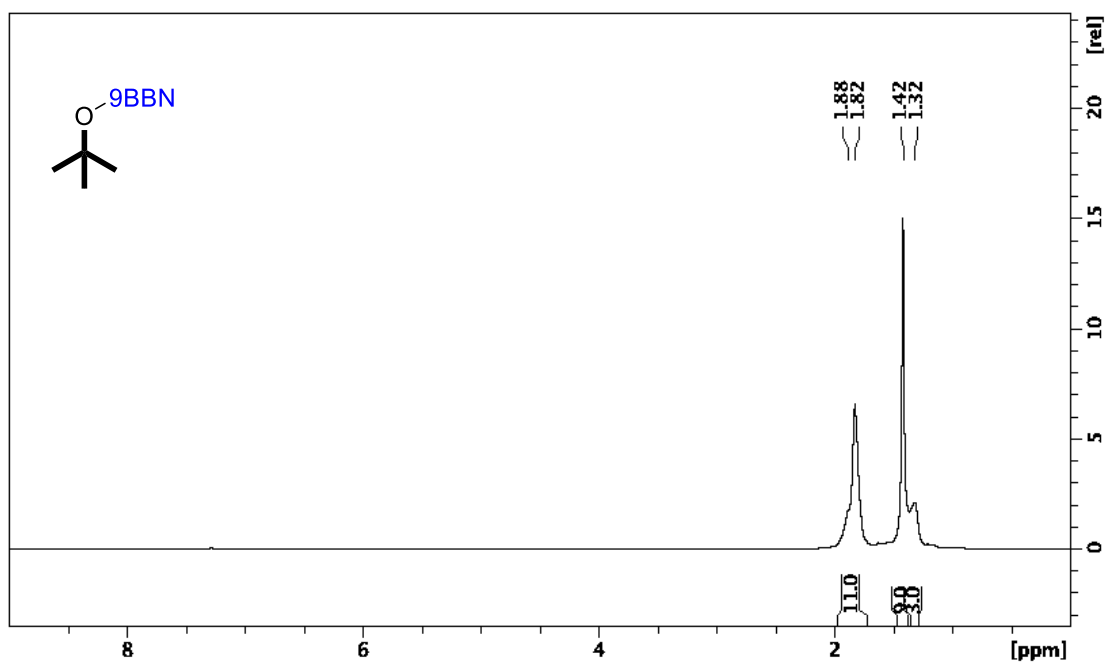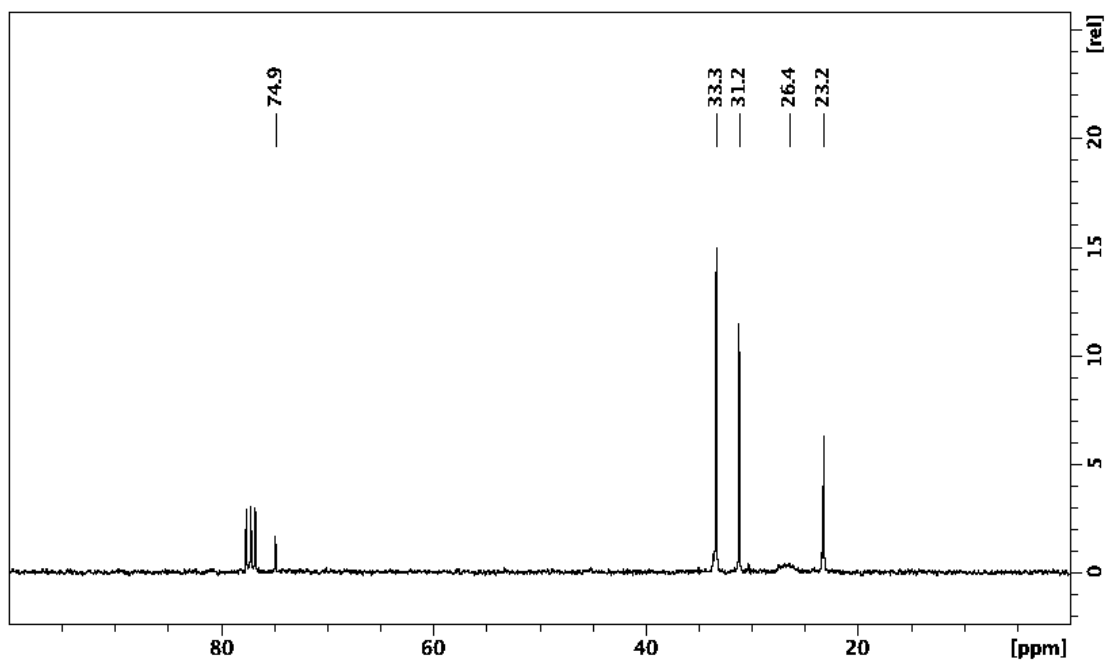

3a

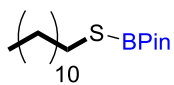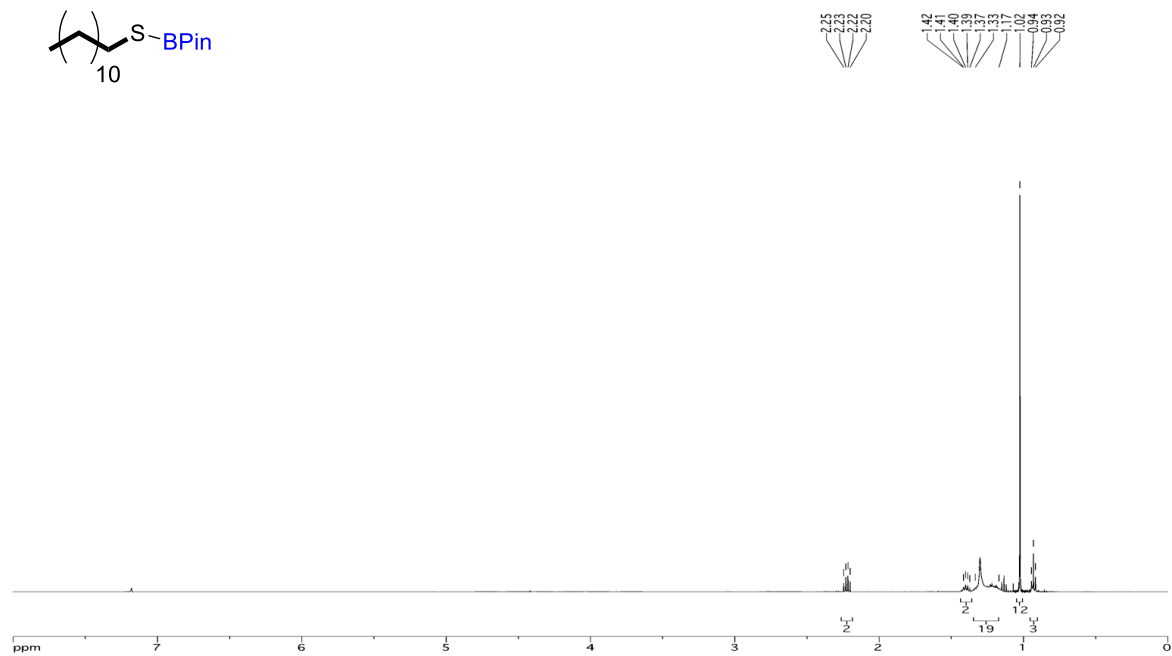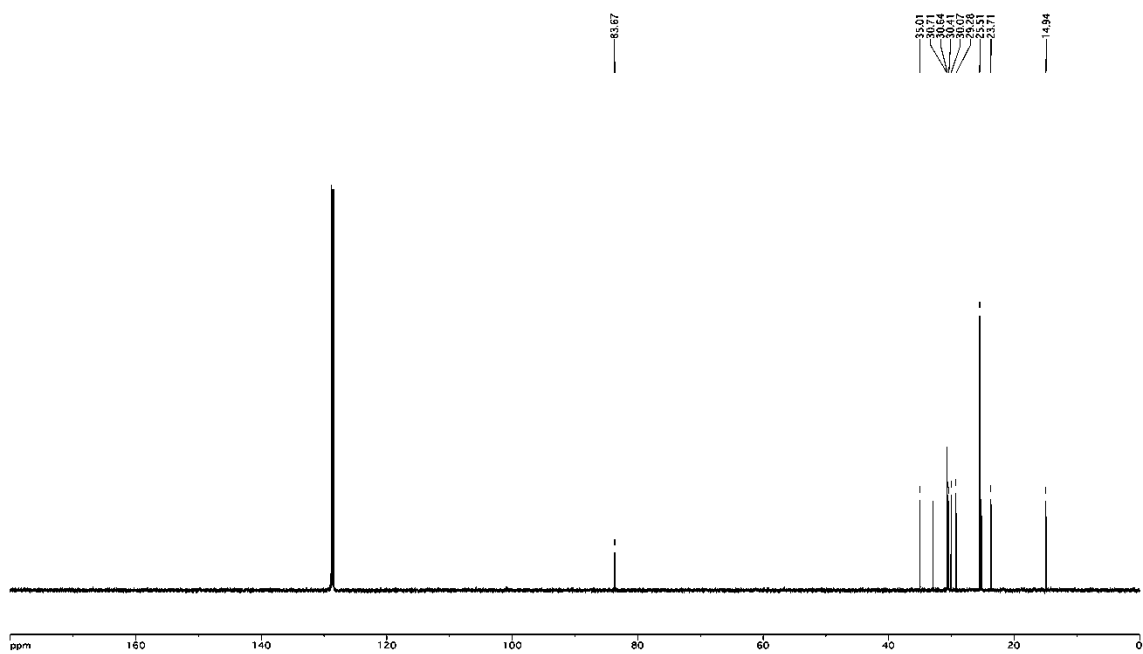

3b

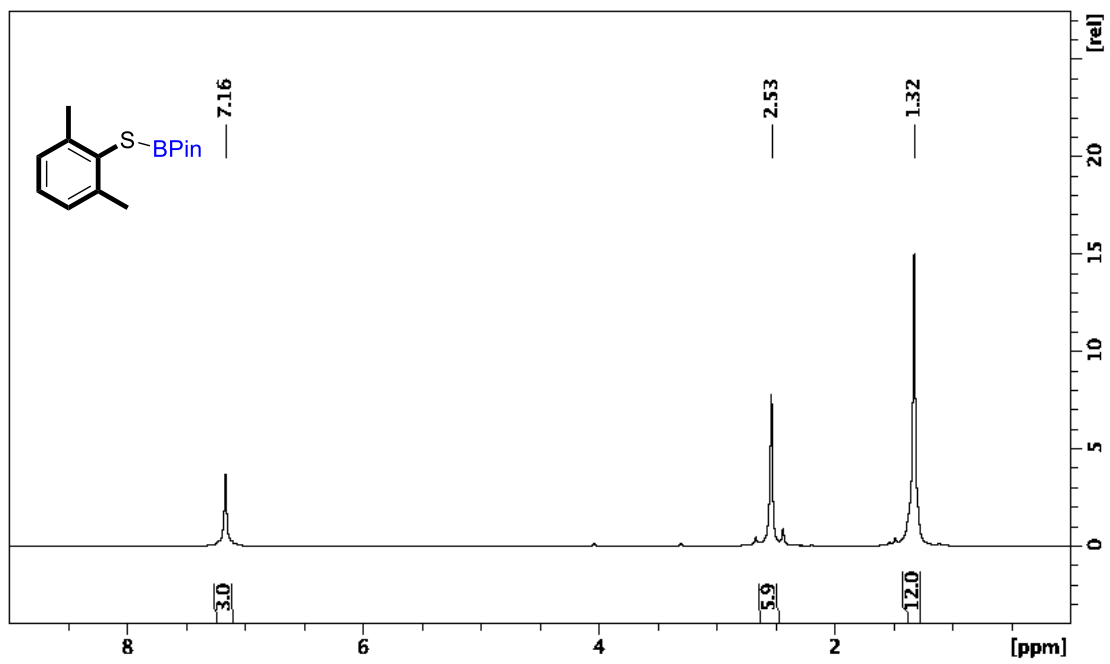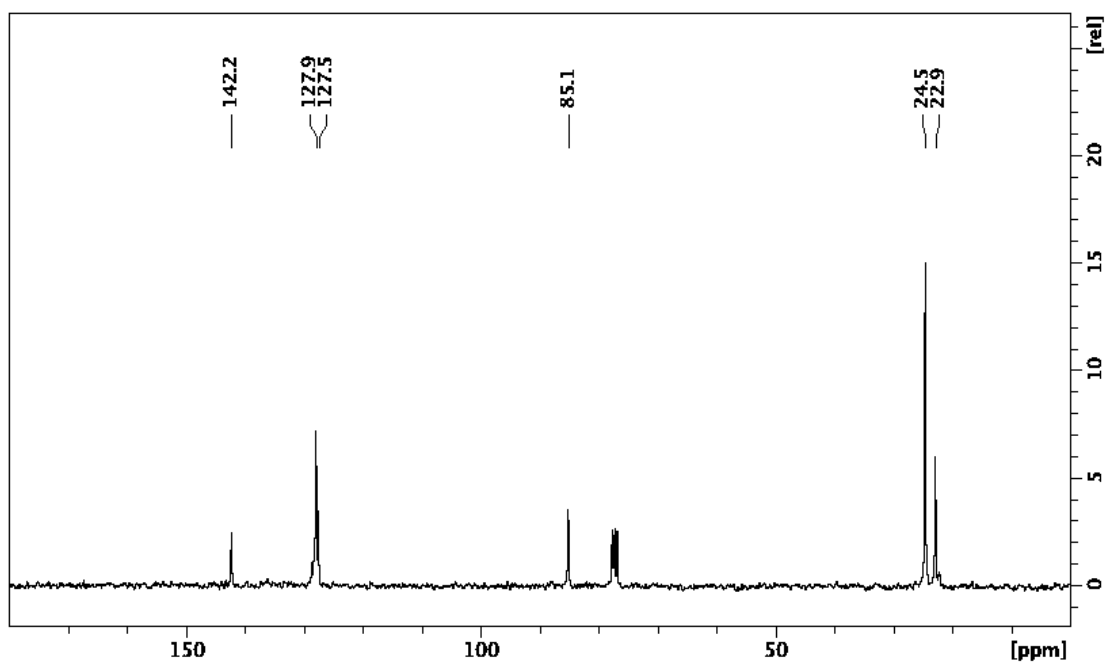

3c

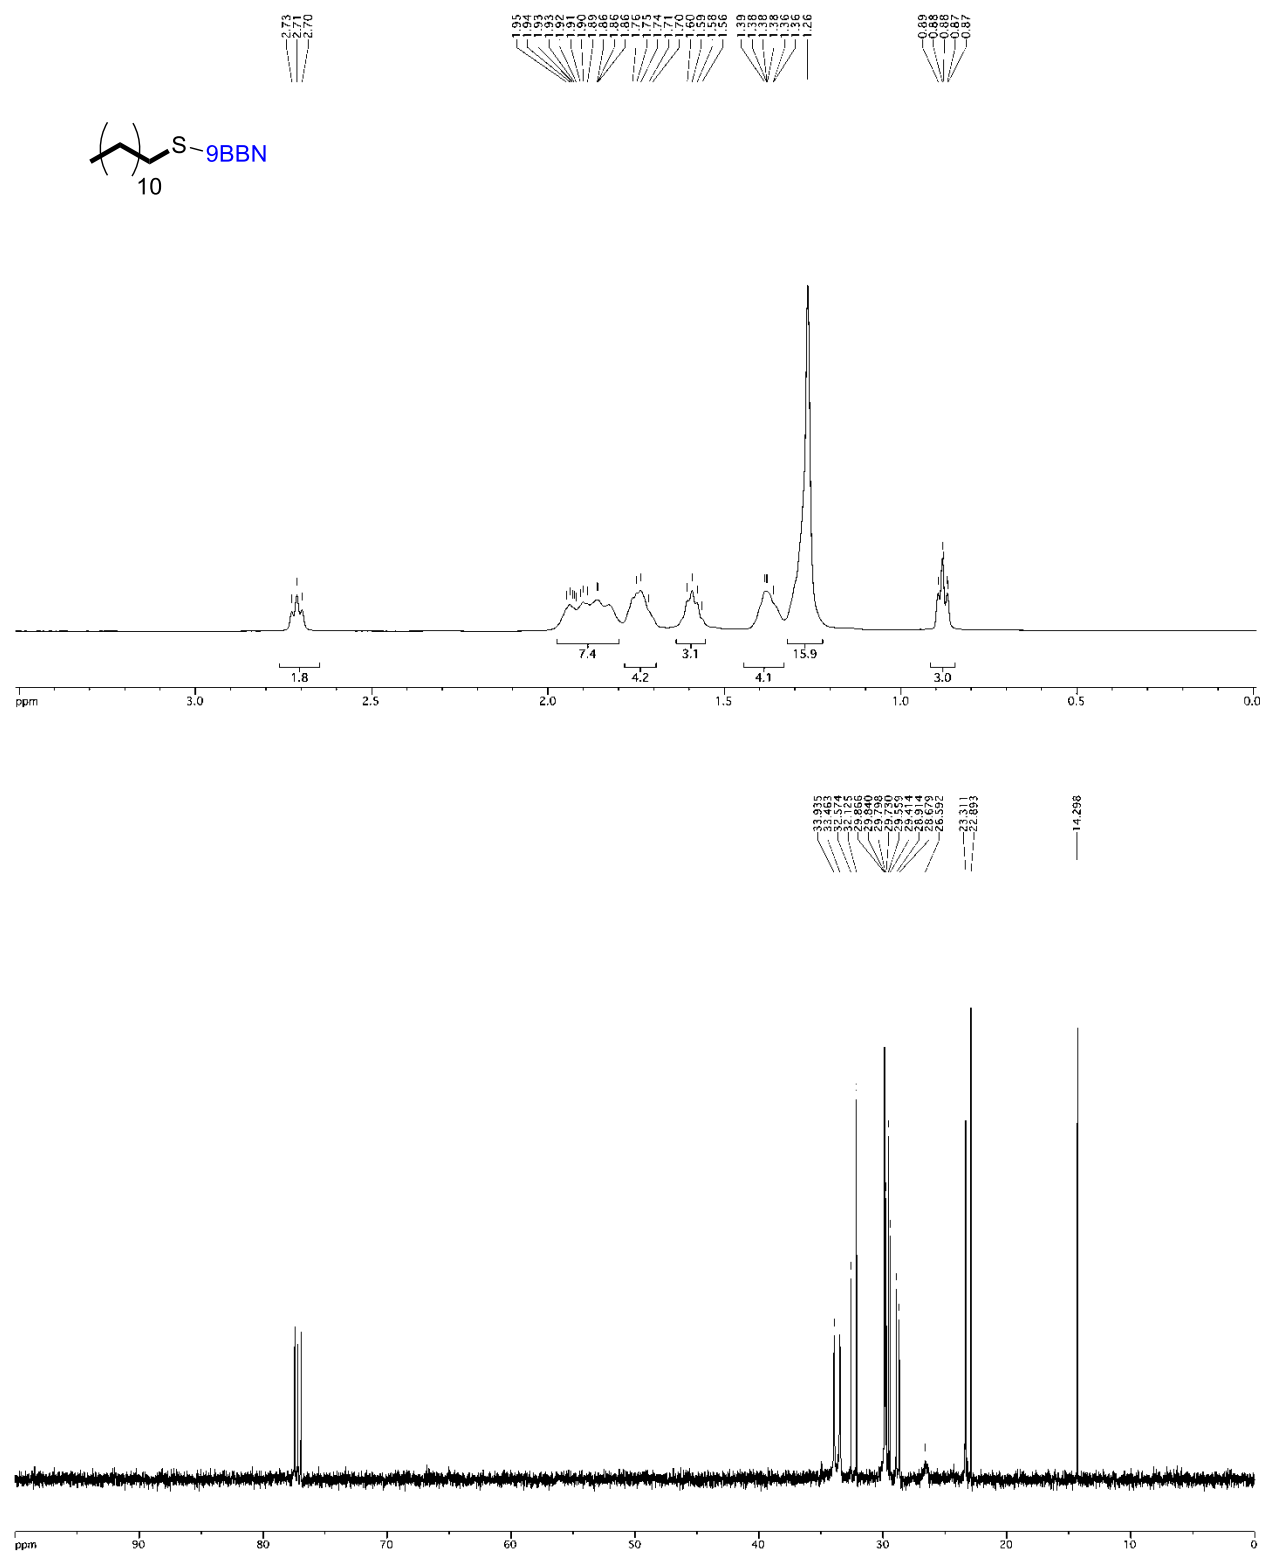

3d

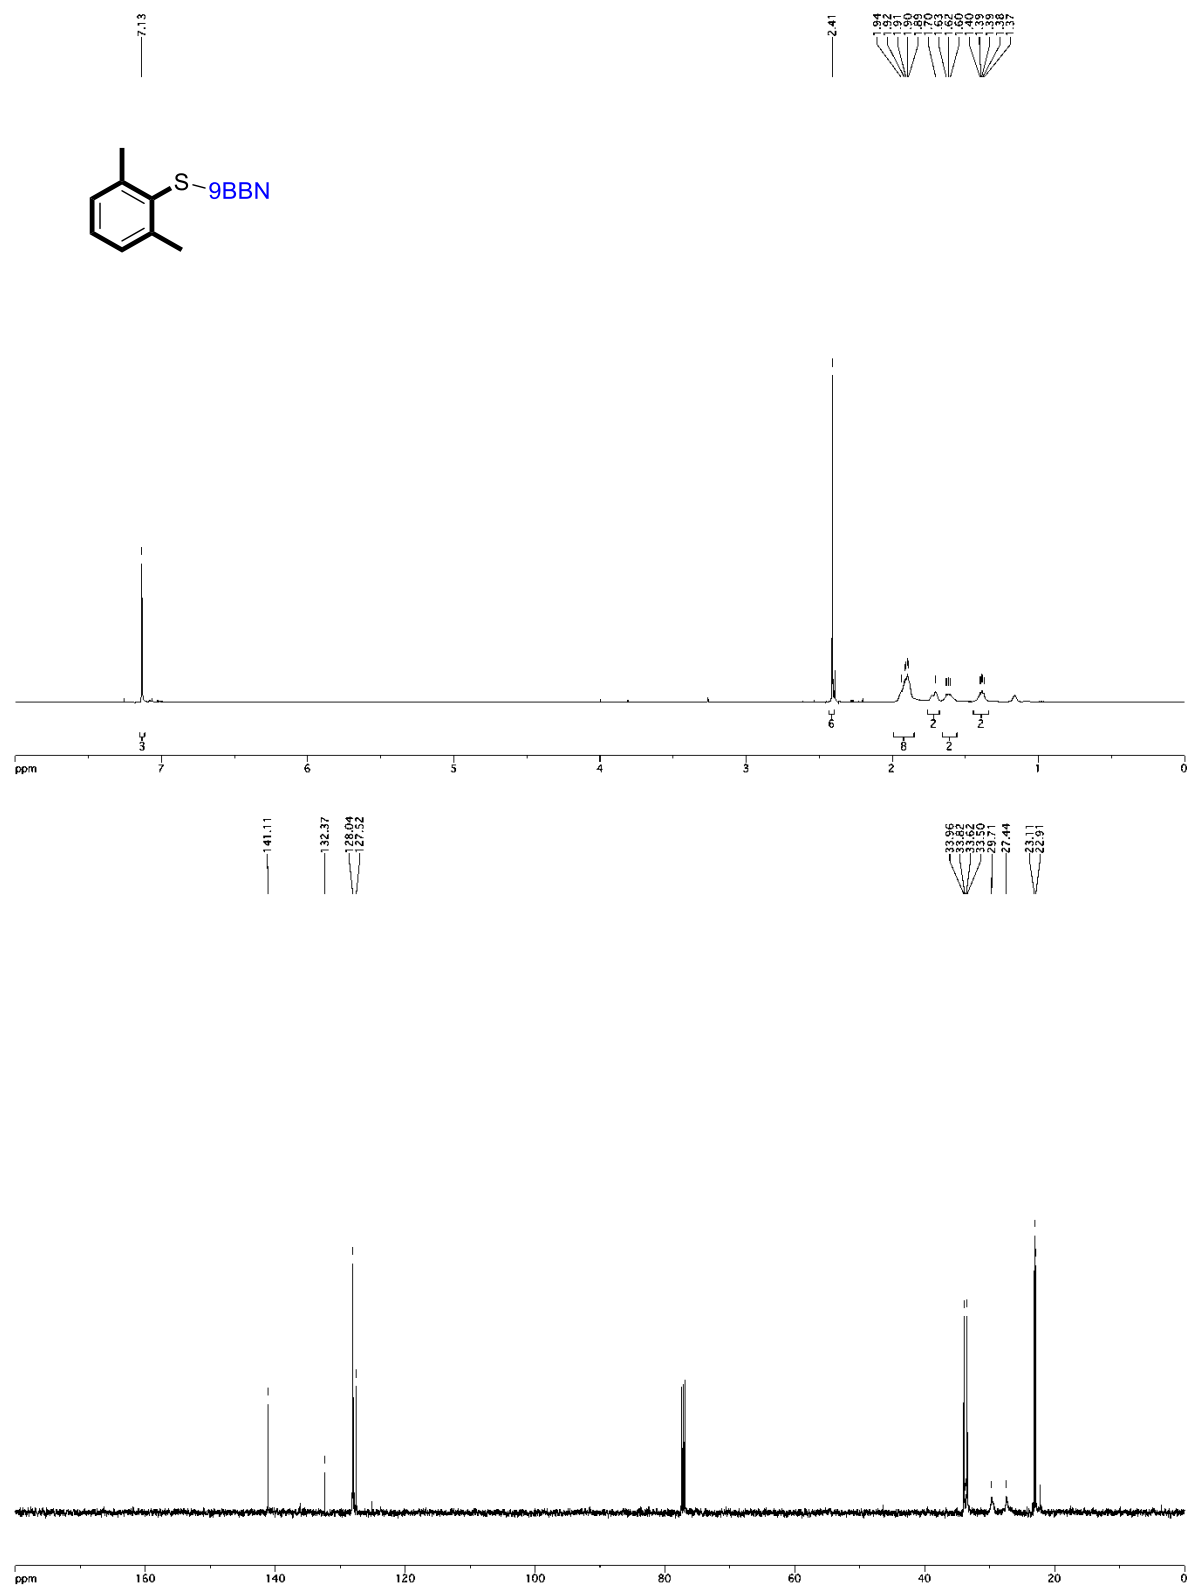

## I. X-ray

### Crystal data and structure refinement for AllylNH<sub>2</sub>HBPIn.

CCDC 1489647

|                                             |                                                               |
|---------------------------------------------|---------------------------------------------------------------|
| Identification code                         | AllylNH <sub>2</sub> HBPIn                                    |
| Empirical formula                           | C <sub>9</sub> H <sub>20</sub> BNO <sub>2</sub>               |
| Formula weight                              | 185.07                                                        |
| Temperature/K                               | 100.0                                                         |
| Crystal system                              | orthorhombic                                                  |
| Space group                                 | Iba2                                                          |
| a/Å                                         | 10.1195(6)                                                    |
| b/Å                                         | 29.385(2)                                                     |
| c/Å                                         | 7.4892(4)                                                     |
| α/°                                         | 90                                                            |
| β/°                                         | 90                                                            |
| γ/°                                         | 90                                                            |
| Volume/Å <sup>3</sup>                       | 2227.0(2)                                                     |
| Z                                           | 8                                                             |
| ρ <sub>calc</sub> /cm <sup>3</sup>          | 1.104                                                         |
| μ/mm <sup>-1</sup>                          | 0.074                                                         |
| F(000)                                      | 816.0                                                         |
| Crystal size/mm <sup>3</sup>                | 0.2 × 0.1 × 0.01                                              |
| Radiation                                   | MoKα (λ = 0.71073)                                            |
| 2θ range for data collection/°              | 2.772 to 56.246                                               |
| Index ranges                                | -13 ≤ h ≤ 13, -37 ≤ k ≤ 38, -9 ≤ l ≤ 9                        |
| Reflections collected                       | 8760                                                          |
| Independent reflections                     | 2442 [R <sub>int</sub> = 0.0709, R <sub>sigma</sub> = 0.0791] |
| Data/restraints/parameters                  | 2442/1/130                                                    |
| Goodness-of-fit on F <sup>2</sup>           | 1.005                                                         |
| Final R indexes [I ≥ 2σ (I)]                | R <sub>1</sub> = 0.0495, wR <sub>2</sub> = 0.0905             |
| Final R indexes [all data]                  | R <sub>1</sub> = 0.0893, wR <sub>2</sub> = 0.1063             |
| Largest diff. peak/hole / e Å <sup>-3</sup> | 0.19/-0.21                                                    |
| Flack parameter                             | 0.5                                                           |



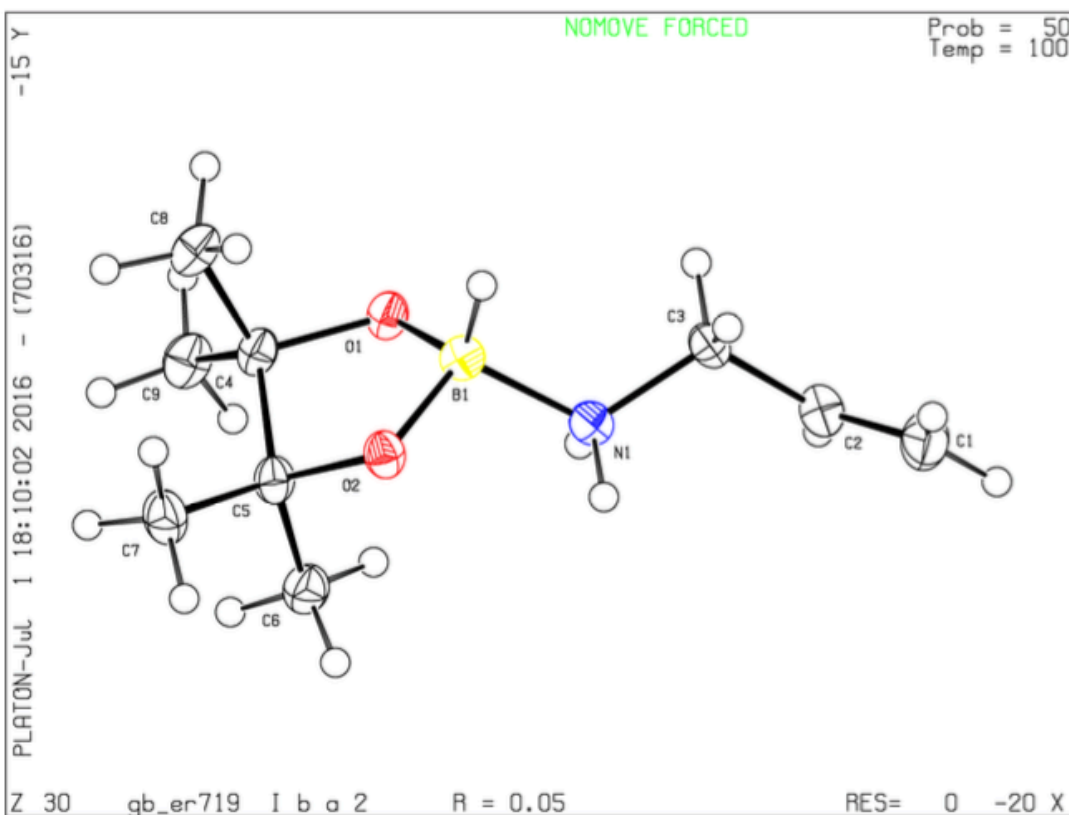

**Table 1 Bond Lengths for AllylNH2HBPIn.**

| Atom | Atom | Length/Å | Atom | Atom | Length/Å |
|------|------|----------|------|------|----------|
| O1   | C4   | 1.441(4) | C2   | C3   | 1.492(4) |
| O1   | B1   | 1.463(4) | C4   | C5   | 1.552(4) |
| O2   | C5   | 1.442(4) | C4   | C8   | 1.531(4) |
| O2   | B1   | 1.467(4) | C4   | C9   | 1.524(4) |
| N1   | C3   | 1.493(4) | C5   | C6   | 1.528(4) |
| N1   | B1   | 1.617(4) | C5   | C7   | 1.512(4) |
| C1   | C2   | 1.310(5) |      |      |          |

**Table 2 Bond Angles for AllylNH2HBPIn.**

| Atom | Atom | Atom | Angle/°  | Atom | Atom | Atom | Angle/°  |
|------|------|------|----------|------|------|------|----------|
| C4   | O1   | B1   | 106.9(2) | C9   | C4   | C8   | 109.5(3) |
| C5   | O2   | B1   | 108.6(2) | O2   | C5   | C4   | 101.7(2) |
| C3   | N1   | B1   | 116.3(2) | O2   | C5   | C6   | 108.4(3) |
| C1   | C2   | C3   | 123.9(3) | O2   | C5   | C7   | 108.7(3) |
| C2   | C3   | N1   | 112.1(3) | C6   | C5   | C4   | 112.1(3) |
| O1   | C4   | C5   | 102.0(2) | C7   | C5   | C4   | 115.2(3) |
| O1   | C4   | C8   | 108.7(2) | C7   | C5   | C6   | 110.2(3) |
| O1   | C4   | C9   | 108.7(3) | O1   | B1   | O2   | 105.6(3) |
| C8   | C4   | C5   | 112.4(3) | O1   | B1   | N1   | 108.4(3) |
| C9   | C4   | C5   | 115.0(2) | O2   | B1   | N1   | 109.2(2) |
